# Supplementary material for: Microtubules originate asymmetrically at the somatic golgi and are guided via Kinesin2 to maintain polarity within neurons
Source: eLife. 2020 Jul 13;9:e58943. doi: 10.7554/eLife.58943 (PMC7394546; doi:10.7554/eLife.58943)
Supplement: Figure 6—source data 1. [file elife-58943-fig6-data1.xlsx]

## Sheet: neuron1
221_ManII-EB1gfp_1.1_3s intv
		comet number	in first frame	from Golgi	angle from axon	Golgi number	postive or negative	new angle	new angle pasted			from golgi	not from goli
		1	y
		2	y
		3	y
		4	y
		5	y
		6	n	y	0.216	1	-1	-0.216	-0.216			21	15
		7	y
		8	n	y	5.6	2	1	5.6	5.6
		9	n	y	13.13	2	1	13.13	13.13
		10	n	y	8.667	3	-1	-8.667	-8.667
		11	n	n
		12	n	n
		13	n	y	88.2	4	-1	-88.2	-88.2
		14	n	y	158.5	5	1	158.5	158.5
		15	n	n
		16	n	y	30.2	6	-1	-30.2	-30.2
		17	n	y	20.21	6	-1	-20.21	-20.21
		18	n	n
		19	n	y	36.5	7	-1	-36.5	-36.5
		20	n	y	33.23	1	1	33.23	33.23
		21	n	y	24	1	-1	-24	-24
		22	n	n
		23	n	y	12.76	8	-1	-12.76	-12.76
		24	n	n
		25	n	y	19	9	-1	-19	-19
		26	n	n
		27	n	n
		28	n	n
		29	n	y	39.6	9	-1	-39.6	-39.6
		30	n	n
		31	n	y	4.1	2	1	4.1	4.1
		32	n	n
		33	n	n
		34	n	y	106.1	8	1	106.1	106.1
		35	n	y	128	4	-1	-128	-128
		36	n	n
		37	n	n
		38	n	y	23.3	9	-1	-23.3	-23.3
		39	n	y	19.6	7	1	19.6	19.6
		40	n	n
		41	n	y	20	6	-1	-20	-20
		42	n	y	22.6	1	-1	-22.6	-22.6

## Sheet: neuron9
221_ManII-EB1gfp_9_3s intv
		comet number	in first frame	from Golgi	angle from axon	golgi stack	postive or negative	new angle	new angle pasted
		1	n	y	12.2	1	1	12.2	12.2
		2	n	n
		3	n	n
		4	n	n
		5	n	y	9.8	2	1	9.8	9.8
		7	n	n
		9	n	y	61.4	3	1	61.4	61.4
		10	n	n
		11	n	y	25.1	1	1	25.1	25.1

## Sheet: neuron2
221_ManII-EB1gfp_2_3s intv
		comet number	in first frame	from Golgi	angle from axon	Golgi number	postive or negative	new angle	new angle pasted			from golgi	not from goli
		1	n	n								32	18
		2	n	y	9.2	1	-1	-9.2	-9.2
		3	n	y	8.7	2	-1	-8.7	-8.7
		4	n	y	11.5	3	1	11.5	11.5
		5	n	n
		6	n	n
		7	n	y	27.7	2	1	27.7	27.7
		8	n	n
		9	n	n
		10	n	y	79.8	4	-1	-79.8	-79.8
		11	n	n
		12	n	y	62.3	5	-1	-62.3	-62.3
		13	n	n
		14	n	y	170	5	1	170	170
		15	n	n
		16	n	n
		17	n	y	104.9	6	-1	-104.9	-104.9
		18	n	y	10.5	7	-1	-10.5	-10.5
		19	n	y	33.6	3	-1	-33.6	-33.6
		20	n	n
		21	n	y	3.7	7	1	3.7	3.7
		22	n	y	12.7	8	1	12.7	12.7
		23	n	y	12.8	1	-1	-12.8	-12.8
		24	n	y	0.5	2	1	0.5	0.5
		25	n	n
		26	n	n
		27	n	y	68.3	2	-1	-68.3	-68.3
		28	n	y	3	1	1	3	3
		29	n	n
		30	n	y	19	8	1	19	19
		31	n	y	128	1	1	128	128
		32	n	y	102.5	3	-1	-102.5	-102.5
		33	n	y	38.4	5	-1	-38.4	-38.4
		34	n	n
		35	n	y	118	5	-1	-118	-118
		36	n	y	88	6	1	88	88
		37	n	y	83.9	6	1	83.9	83.9
		38	n	y	154.8	6	-1	-154.8	-154.8
		39	n	n
		40	n	y	74.6	6	-1	-74.6	-74.6
		41	n	y	74	6	-1	-74	-74
		42	n	y	119	6	-1	-119	-119
		43	n	y	79	6	1	79	79
		45	n	y	118.5	6	-1	-118.5	-118.5
		46	n	n
		47	n	y	27	9	1	27	27
		48	n	y	2.9	9	1	2.9	2.9
		49	n	n
		50	n	n
		51	n	y	44	8	-1	-44	-44

## Sheet: neuron3
221_ManII-EB1gfp_3_3s intv_good one
		comet number	in first frame	from Golgi	angle from axon	Golgi number	postive or negative	new angle	new angle pasted			from golgi	not from goli
		1	n	y	15.1	1	-1	-15.1	-15.1			21	11
		2	n	y	86.3	2	1	86.3	86.3
		3	n	y	10.7	3	-1	-10.7	-10.7
		4	n	n
		5	n	y	15.8	2	1	15.8	15.8
		6	n	y	27.7	3	1	27.7	27.7
		7	n	n
		8	n	n
		9	n	n
		10	n	y	24.8	4	1	24.8	24.8
		11	n	y	29.8	4	-1	-29.8	-29.8
		12	n	y	19.8	4	-1	-19.8	-19.8
		13	n	n
		14	n	y	114
		15	n	y	91.4	5	-1	-91.4	-91.4
		16	n	y	63.2	5	-1	-63.2	-63.2
		17	n	y	57.9	5	-1	-57.9	-57.9
		18	n	y	7.8	5	-1	-7.8	-7.8
		19	n	n
		20	n	y	31.4	6	1	31.4	31.4
		21	n	n
		22	n	n
		23	n	n
		24	n	y	112	6	1	112	112
		25	n	y	158.5	7	1	158.5	158.5
		26	n	y	150	6	1	150	150
		28	n	n
		29	n	y	19.7	7	1	19.7	19.7
		30	n	y	28	7	1	28	28
		31	n	y	2.9	5	-1	-2.9	-2.9
		32	n	n
		33	n	y	107.5	8	1	107.5	107.5

## Sheet: neuron4
221_ManII-EB1gfp_4_3s intv
		comet number	in first frame	from Golgi	angle from axon	notes
		1	n	y	29.7
		2	n	n
		3	n	n
		4	n	n
		5	n	n
		6	n	y	77.7
		7	n	n

## Sheet: neuron6
221_ManII-EB1gfp_6_3s intv
		comet number	in first frame	from Golgi	angle from axon	Golgi number	postive or negative	new angle	new angle pasted
		1	n	n
		2	n	y	58.8	1	1	58.8	58.8
		3	n	y	0.3	1	-1	-0.3	-0.3
		4	n	n
		5	n	y	68.3	1	1	68.3	68.3
		6	n	y	45.2	2	1	45.2	45.2
		7	n	y	18.4	2	1	18.4	18.4
		8	n	y	48.1	1	1	48.1	48.1
		9	n	n
		10	n	n
		11	n	y	3	3	1	3	3
		12	n	n
		13	n	y	74.1	4	1	74.1	74.1
		14	n	n
		15	n	y	61.5	4	1	61.5	61.5
		16	n	n
		17	n	n
		18	n	n
		20	n	y	89.9	5	-1	-89.9	-89.9
		21	n	n
		22	n	y	4	6	-1	-4	-4
		23	n	y	20.8	6	1	20.8	20.8
		25	n	n
		26	n	y	47.2	7	-1	-47.2	-47.2
		27	n	y	81.1	7	-1	-81.1	-81.1
		28	n	y	144.6	7	-1	-144.6	-144.6
		29	n	y	144	7	-1	-144	-144
		30	n	y	138	8	-1	-138	-138
		31	n	y	140.6	9	-1	-140.6	-140.6
		32	n	y	141	9	-1	-141	-141
		34	n	n
		35	n	y	20.1	2	1	20.1	20.1
		36	n	y	30.5	2	1	30.5	30.5
		37	n	y	26.3	1	1	26.3	26.3
		38	n	y	1.74	1	-1	-1.74	-1.74
		39	n	y	12.9	10	1	12.9	12.9
		40	n	n
		41	n	y	109	10	1	109	109
		42	n	n
		43	n	n
		44	n	n
		45	n	n
		47	n	n
		48	n	n

## Sheet: neuron7
221_ManII-EB1gfp_7_3s intv
		comet number	in first frame	from Golgi	angle from axon	Golgi number	postive or negative	new angle	new angle pasted
		1	n	y	50.4	1	1	50.4	50.4
		2	n	y	12.3	1	-1	-12.3	-12.3
		3	n	y	24.6	1	-1	-24.6	-24.6
		4	n	n
		5	n	y	31.9	1	1	31.9	31.9
		6	n	y	4.1	2	-1	-4.1	-4.1
		7	n	y	16.7	1	1	16.7	16.7
		8	n	y	56.9	1	-1	-56.9	-56.9
		9	n	y	13.1	1	-1	-13.1	-13.1
		10	n	n
		11	n	y	10.1	1	1	10.1	10.1
		12	n	n
		13	n	y	0.62	3	-1	-0.62	-0.62
		14	n	y	7.4	3	1	7.4	7.4
		15	n	y	6.7	3	1	6.7	6.7
		16	n	y	5.7	3	1	5.7	5.7
		17	n	y	6.3	3	1	6.3	6.3
		18	n	y	4	3	1	4	4
		19	n	y	5.6	3	1	5.6	5.6
		20	n	y	37.5	3	-1	-37.5	-37.5
		21	n	y	18.1	3	-1	-18.1	-18.1
		22	n	y	57.8	4	-1	-57.8	-57.8
		23	n	y	166	4	-1	-166	-166
		24	n	y	29	4	-1	-29	-29
		25	n	y	27.2	4	1	27.2	27.2
		26	n	y	15.5	5	-1	-15.5	-15.5
		27	n	n
		28	n	n
		29	n	y	6.3	5	1	6.3	6.3
		30	n	n
		31	n	y	19.4	1	-1	-19.4	-19.4
		32	n	n
		33	n	n
		34	n	y	31.2	2	1	31.2	31.2
		35	n	y	31.7	3	1	31.7	31.7
		36	n	y	0.3	3	1	0.3	0.3
		37	n	n
		39	n	n
		40	n	n
		41	n	y	52.6	6	1	52.6	52.6
		42	n	y	8	7	1	8	8
		43	n	n
		44	n	n
		45	n	n
		46	n	y	73.3	8	-1	-73.3	-73.3
		47	n	n
		48	n	n
		49	n	n
		50	n	n
		51	n	n
		52	n	n
		53	n	y	25.4	8	1	25.4	25.4
		54	n	n
		55	n	n
		56	n	n
		57	n	y	31	8	1	31	31
		58	n	y	84	9	-1	-84	-84
		59	n	y	126	10	-1	-126	-126
		60	n	n
		61	n	y	103	11	1	103	103
		62	n	n
		63	n	y	121.3	11	1	121.3	121.3
		64	n	y	29.3	12	-1	-29.3	-29.3
		65	n	n
		66	n	n
		67	n	y	101	12	1	101	101
		68	n	y	31.1	13	-1	-31.1	-31.1
		69	n	n
		70	n	n
		71	n	n

## Sheet: neuron8
221_ManII-EB1gfp_8_3s intv
		comet number	in first frame	from Golgi	angle from axon	Golgi number	postive or negative	new angle	new angle pasted
		1	n	y	10	1	1	10	10
		2	n	n
		3	n	n
		4	n	y	137.2	1	-1	-137.2	-137.2
		5	n	y	169.8	1	-1	-169.8	-169.8
		6	n	y	33.8	2	-1	-33.8	-33.8
		7	n	n
		8	n	y	71.2	3	-1	-71.2	-71.2
		9	n	y	83.3	4	-1	-83.3	-83.3
		10	n	y	31	5	-1	-31	-31
		11	n	y	102.4	5	-1	-102.4	-102.4
		12	n	y	85.1	4	-1	-85.1	-85.1
		13	n	n
		14	n	y	164.6	2	1	164.6	164.6
		15	n	n
		16	n	y	177.3	6	-1	-177.3	-177.3
		17	n	y	86.5	5	-1	-86.5	-86.5
		18	n	y	72.6	3	-1	-72.6	-72.6
		19	n	y	75.2	3	-1	-75.2	-75.2
		20	n	n
		21	n	y	162	7	-1	-162	-162
		23	n	y	25.6	8	-1	-25.6	-25.6
		24	n	y	43	8	-1	-43	-43
		25	n	y	136.8	6	-1	-136.8	-136.8
		26	n	y	69.4	3	-1	-69.4	-69.4
		27	n	n
		28	n	y	89.1	3	1	89.1	89.1
		29	n	y	157.9	2	-1	-157.9	-157.9

## Sheet: calculating resultant vectors
																																											ADDING VECTORS
		Angles from each stack										Angle in RADIANS											Y value										X value										Y
	neruon1	golgi1	golgi2	golgi4	golgi6	golgi7	golgi8	golgi9				neruon1	golgi1	golgi2	golgi4	golgi6	golgi7	golgi8	golgi9				neruon1	golgi1	golgi2	golgi4	golgi6	golgi7	golgi8	golgi9			neruon1	golgi1	golgi2	golgi4	golgi6	golgi7	golgi8	golgi9			neruon1	golgi1	golgi2	golgi4	golgi6	golgi7	golgi8
		-0.216	5.6	-88.2	-30.2	-36.5	-12.76	-19					-0.00376991	0.0977384	-1.53938	-0.527089	-0.637045	-0.222704	-0.331613					0.999993	0.995227	0.0314108	0.864275	0.803857	0.975304	0.945519				-0.0037699	0.0975829	-0.999507	-0.50302	-0.594823	-0.220868	-0.325568				3.67323	2.96653	-0.584251	2.7424	1.74591	0.697989
		33.23	13.13	-128	-20.21	19.6	106.1	-39.6					0.579973	0.229162	-2.23402	-0.352731	0.342085	1.85179	-0.69115					0.836477	0.973857	-0.615661	0.938433	0.942057	-0.277315	0.770513				0.548001	0.227161	-0.788011	-0.345462	0.335452	0.960779	-0.637424
		-24	4.1		-20			-23.3					-0.418879	0.0715585		-0.349066			-0.406662					0.913545	0.997441		0.939693			0.918446				-0.406737	0.0714974		-0.34202			-0.395546			number of comets	4	3	2	3	2	2
		-22.6											-0.394444											0.92321										-0.384295									scaled Y value	0.918307	0.988842	-0.292125	0.914133	0.872957	0.348995
	neruon2	golgi1	golgi2	golgi3	golgi5	golgi6	golgi7	golgi8	golgi9			neruon2	golgi1	golgi2	golgi3	golgi5	golgi6	golgi7	golgi8	golgi9			neruon2	golgi1	golgi2	golgi3	golgi5	golgi6	golgi7	golgi8	golgi9		neruon2	golgi1	golgi2	golgi3	golgi5	golgi6	golgi7	golgi8	golgi9		neruon2	golgi1	golgi2	golgi3	golgi5	golgi6	golgi7
		-9.2	-8.7	11.5	-62.3	-104.9	-10.5	12.7	27				-0.16057	-0.151844	0.200713	-1.08734	-1.83085	-0.18326	0.221657	0.471239				0.987136	0.988494	0.979925	0.464842	-0.257133	0.983255	0.975535	0.891007			-0.159881	-0.151261	0.199368	-0.885394	-0.966376	-0.182236	0.219846	0.45399			2.34525	3.2436	1.59641	-0.205744	-1.25076	1.98117
		-12.8	27.7	-33.6	170	88	3.7	19	2.9				-0.223402	0.483456	-0.586431	2.96706	1.53589	0.0645772	0.331613	0.0506145				0.975149	0.885394	0.832921	-0.984808	0.0348995	0.997916	0.945519	0.998719			-0.221548	0.464842	-0.553392	0.173648	0.999391	0.0645323	0.325568	0.0505929
		3	0.5	-102.5	-38.4	83.9		-44					0.0523599	0.00872665	-1.78896	-0.670206	1.46433		-0.767945					0.99863	0.999962	-0.21644	0.783693	0.106264		0.71934				0.052336	0.00872654	-0.976296	-0.621148	0.994338		-0.694658			number of comets	4	4	3	4	9	2
		128	-68.3		-118	-154.8							2.23402	-1.19206		-2.05949	-2.70177							-0.615661	0.369747		-0.469472	-0.904827						0.788011	-0.929133		-0.882948	-0.425779					scaled Y value	0.586313	0.810899	0.532135	-0.051436	-0.138974	0.990585
						-74.6											-1.30202											0.265556										-0.964095
						-74											-1.29154											0.275637										-0.961262
						-119											-2.07694											-0.48481										-0.87462
						79											1.37881											0.190809										0.981627
						-118.5											-2.06822											-0.477159										-0.878817
	neruon3	golgi2	golgi3	golgi4	golgi5	golgi6	golgi7					neruon3	golgi2	golgi3	golgi4	golgi5	golgi6	golgi7					neruon3	golgi2	golgi3	golgi4	golgi5	golgi6	golgi7				neruon3	golgi2	golgi3	golgi4	golgi5	golgi6	golgi7				neruon3	golgi2	golgi3	golgi4	golgi5	golgi6	golgi7
		86.3	-10.7	24.8	-91.4	31.4	158.5						1.50622	-0.18675	0.432842	-1.59523	0.548033	2.76635						0.0645323	0.982613	0.907777	-0.0244322	0.853551	-0.930418					0.997916	-0.185667	0.419452	-0.999701	0.52101	0.366501					1.02675	1.86801	2.71642	2.94731	-0.387081	0.894001
		15.8	27.7	-29.8	-63.2	112	19.7						0.275762	0.483456	-0.520108	-1.10305	1.95477	0.34383						0.962218	0.885394	0.867765	0.450878	-0.374607	0.941471					0.27228	0.464842	-0.496974	-0.892586	0.927184	0.337095
				-19.8	-57.9	150	28								-0.345575	-1.01055	2.61799	0.488692								0.940881	0.531399	-0.866025	0.882948							-0.338738	-0.847122	0.5	0.469472				number of comets	2	2	3	5	3	3
					-7.8											-0.136136											0.990748										-0.135716						scaled Y value	0.513375	0.934003	0.905475	0.589462	-0.129027	0.298
					-2.9											-0.0506145											0.998719										-0.0505929
	neuron4 and 5 not applicable
	neruon6	golgi1	golgi2	golgi4	golgi6	golgi7	golgi9	golgi10				neruon6	golgi1	golgi2	golgi4	golgi6	golgi7	golgi9	golgi10				neruon6	golgi1	golgi2	golgi4	golgi6	golgi7	golgi9	golgi10			neruon6	golgi1	golgi2	golgi4	golgi6	golgi7	golgi9	golgi10			neruon6	golgi1	golgi2	golgi4	golgi6	golgi7	golgi9
		58.8	45.2	74.1	-4	-47.2	-140.6	12.9					1.02625	0.788889	1.29329	-0.0698132	-0.823795	-2.45393	0.225147					0.518027	0.704634	0.273959	0.997564	0.679441	-0.772734	0.974761				0.855364	0.709571	0.961741	-0.0697565	-0.73373	-0.634731	0.22325				4.45162	3.45423	0.751118	1.93239	-0.789993	-1.54988
		-0.3	18.4	61.5	20.8	-81.1	-141	109					-0.00523599	0.321141	1.07338	0.363028	-1.41546	-2.46091	1.90241					0.999986	0.948876	0.477159	0.934826	0.15471	-0.777146	-0.325568				-0.00523596	0.315649	0.878817	0.355107	-0.98796	-0.62932	0.945519
		68.3	20.1			-144.6							1.19206	0.350811			-2.52375							0.369747	0.939094			-0.815128						0.929133	0.34366			-0.579281					number of comets	6	4	2	2	4	2
		48.1	30.5			-144							0.839503	0.532325			-2.51327							0.667833	0.861629			-0.809017						0.744312	0.507538			-0.587785					scaled Y value	0.741936	0.863558	0.375559	0.966195	-0.197498	-0.77494
		26.3											0.459022											0.896486										0.443071
		-1.74											-0.0303687											0.999539										-0.0303641
	neruon7	golgi1	golgi2	golgi3	golgi4	golgi5	golgi8	golgi11	golgi12			neruon7	golgi1	golgi2	golgi3	golgi4	golgi5	golgi8	golgi11	golgi12			neruon7	golgi1	golgi2	golgi3	golgi4	golgi5	golgi8	golgi11	golgi12		neruon7	golgi1	golgi2	golgi3	golgi4	golgi5	golgi8	golgi11	golgi12		neruon7	golgi1	golgi2	golgi3	golgi4	golgi5	golgi8
		50.4	-4.1	-0.62	-57.8	-15.5	-73.3	103	-29.3				0.879646	-0.0715585	-0.010821	-1.0088	-0.270526	-1.27933	1.79769	-0.511381				0.637424	0.997441	0.999941	0.532876	0.96363	0.287361	-0.224951	0.872069			0.770513	-0.0714974	-0.0108208	-0.846193	-0.267238	-0.957822	0.97437	-0.489382			7.7783	1.85281	10.5613	1.32662	1.95759	2.04786
		-12.3	31.2	7.4	-166	6.3	25.4	121.3	101				-0.214675	0.544543	0.129154	-2.89725	0.109956	0.443314	2.11708	1.76278				0.977046	0.855364	0.991671	-0.970296	0.993961	0.903335	-0.519519	-0.190809			-0.21303	0.518027	0.128796	-0.241922	0.109734	0.428935	0.854459	0.981627
		-24.6		6.7	-29		31						-0.429351		0.116937	-0.506145		0.541052						0.909236		0.993171	0.87462		0.857167					-0.416281		0.116671	-0.48481		0.515038				number of comets	9	2	11	4	2	3
		31.9		5.7	27.2								0.55676		0.0994838	0.47473								0.848972		0.995056	0.889416							0.528438		0.0993197	0.457098						scaled Y value	0.864256	0.926403	0.960114	0.331654	0.978796	0.682621
		16.7		6.3									0.29147		0.109956									0.957822		0.993961								0.287361		0.109734
		-56.9		4									-0.993092		0.0698132									0.546102		0.997564								-0.837719		0.0697565
		-13.1		5.6									-0.228638		0.0977384									0.973976		0.995227								-0.226651		0.0975829
		10.1		-37.5									0.176278		-0.654498									0.984503		0.793353								0.175367		-0.608761
		-19.4		-18.1									-0.338594		-0.315905									0.943223		0.950516								-0.332161		-0.310676
				31.7											0.553269											0.850811										0.525472
				0.3											0.00523599											0.999986										0.00523596
	neruon8	golgi1	golgi2	golgi3	golgi4	golgi5	golgi6	golgi8				neruon8	golgi1	golgi2	golgi3	golgi4	golgi5	golgi6	golgi8				neruon8	golgi1	golgi2	golgi3	golgi4	golgi5	golgi6	golgi8			neruon8	golgi1	golgi2	golgi3	golgi4	golgi5	golgi6	golgi8			neruon8	golgi1	golgi2	golgi3	golgi4	golgi5	golgi6
		10	-33.8	-71.2	-83.3	-31	-177.3	-25.6					0.174533	-0.589921	-1.24267	-1.45386	-0.541052	-3.09447	-0.446804					0.984808	0.830984	0.322266	0.116671	0.857167	-0.99889	0.901833				0.173648	-0.556296	-0.946649	-0.993171	-0.515038	-0.0471065	-0.432086				-0.733118	-1.05964	1.2443	0.202088	0.703481	-1.72786
		-137.2	164.6	-72.6	-85.1	-102.4	-136.8	-43					-2.39459	2.87281	-1.26711	-1.48528	-1.78722	-2.38761	-0.750492					-0.73373	-0.964095	0.299041	0.0854169	-0.214735	-0.728969	0.731354				-0.679441	0.265556	-0.95424	-0.996345	-0.976672	-0.684547	-0.681998
		-169.8	-157.9	-75.2		-86.5							-2.96357	-2.75587	-1.31249		-1.50971							-0.984196	-0.926529	0.255446		0.0610485						-0.177085	-0.376224	-0.966823		-0.998135					number of comets	3	3	5	2	3	2
				-69.4											-1.21126											0.351842										-0.93606							scaled Y value	-0.244373	-0.353213	0.24886	0.101044	0.234494	-0.863929
				89.1											1.55509											0.0157073										0.999877
	neruon9	golgi1										neruon9	golgi1										neruon9	golgi1									neruon9	golgi1									neruon9	golgi1
		12.2											0.21293											0.977416										0.211325										1.88298
		25.1											0.438078											0.905569										0.424199
																																											number of comets	2
																																											scaled Y value	0.941492
[truncated: 26 more columns]

## Sheet: random data
					Random data to look at distance from average angle
																Difference from mean
	neruon1	golgi1	golgi2	golgi3	golgi4	golgi5	golgi6	golgi7	golgi8	golgi9						golgi1	golgi2		golgi4		golgi6	golgi7	golgi8	golgi9
		-159	36	-176	-135	111	71	55	-71	-162						-165.25	-6.66667		-96.5		-10.3333	10.5	-49	-124.333
		23	-9		58		96	34	27	51						16.75	-51.6667		96.5		14.6667	-10.5	49	88.6667
		47	101				77			-2						40.75	58.3333				-4.33333			35.6667
		114														107.75
		6.25	42.6667	-176	-38.5	111	81.3333	44.5	-22	-37.6667
	neruon2	golgi1	golgi2	golgi3	golgi4	golgi5	golgi6	golgi7	golgi8	golgi9						golgi1	golgi2	golgi3	golgi4	golgi5	golgi6	golgi7	golgi8	golgi9
		-168	-46	-175	7	92	-91	-92	-108	104						-86	-18	-159.667		50.5	-118.333	-107.5	-117.333	73.5
		166	96	17		167	166	123	169	-43						248	124	32.3333		125.5	138.667	107.5	159.667	-73.5
		-151	11	112		-70	-4		-33							-69	39	127.333		-111.5	-31.3333		-42.3333
		-175	-173			-23	-37									-93	-145			-64.5	-64.3333
							180														152.667
							81														53.6667
							-62														-89.3333
							-158														-185.333
							171														143.667
		-82	-28	-15.3333	7	41.5	27.3333	15.5	9.33333	30.5
	neruon3	golgi1	golgi2	golgi3	golgi4	golgi5	golgi6	golgi7	golgi8								golgi2	golgi3	golgi4	golgi5	golgi6	golgi7
		-102	42	102	-84	-138	-22	-136	-171								-59	111	-109.333	-54	17	-59.3333
			160	-120	80	-119	16	-62									59	-111	54.6667	-35	55	14.6667
					80	-92	-111	-32											54.6667	-8	-72	44.6667
						-86														-2
						15														99
																				84
		-102	101	-9	25.3333	-84	-39	-76.6667	-171
	neuron4 and 5 not applicable
	neruon6	golgi1	golgi2	golgi3	golgi4	golgi5	golgi6	golgi7	golgi8	golgi9	golgi10					golgi1	golgi2		golgi4		golgi6	golgi7		golgi9	golgi10
		29	137	-52	53	-70	-23	14	-95	68	-149					12.3333	43		-49.5		54	54.5		-16.5	-97.5
		41	158		152		-131	-164		101	46					24.3333	64		49.5		-54	-123.5		16.5	97.5
		-110	135					-70								-126.667	41					-29.5
		44	-54					58								27.3333	-148					98.5
		17														0.333333
		79														62.3333
		16.6667	94	-52	102.5	-70	-77	-40.5	-95	84.5	-51.5
	neruon7	golgi1	golgi2	golgi3	golgi4	golgi5	golgi6	golgi7	golgi8	golgi9	golgi10	golgi11	golgi12	golgi13		golgi1	golgi2	golgi3	golgi4	golgi5			golgi8			golgi11	golgi12
		45	158	-23	129	-141	72	164	151	-147	-164	-37	140	101		21.6667	51	-17.0909	77.5	-56.5			149.333			3	43.5
		86	56	-171	103	-28			10			-43	53			62.6667	-51	-165.091	51.5	56.5			8.33333			-3	-43.5
		-140		21	-113				-156							-163.333		26.9091	-164.5				-157.667
		24		-128	87											0.666667		-122.091	35.5
		-18		113												-41.3333		118.909
		161		64												137.667		69.9091
		120		-64												96.6667		-58.0909
		-64		-9												-87.3333		-3.09091
		-4		113												-27.3333		118.909
				117														122.909
				-98														-92.0909
		23.3333	107	-5.90909	51.5	-84.5	72	164	1.66667	-147	-164	-40	96.5	101
	neruon8	golgi1	golgi2	golgi3	golgi4	golgi5	golgi6	golgi7	golgi8							golgi1	golgi2	golgi3	golgi4	golgi5	golgi6		golgi8
		-65	-24	168	51	-163	35	-144	15							29	24	106.8	21.5	-132.667	-41		57.5
		-97	16	154	8	-24	117		-100							-3	64	92.8	-21.5	6.33333	41		-57.5
		-120	-136	163		96										-26	-88	101.8		126.333
				-67														-128.2
				-112														-173.2
		-94	-48	61.2	29.5	-30.3333	76	-144	-42.5
	neruon8	golgi1	golgi2	golgi3												golgi1
		-142	-85	33												-59.5
		-23														59.5
		-82.5	-85	33

[truncated: 3 more sheets: random1 vector, random2 vector, random3 vector]
