# Supplementary material for: Microtubules originate asymmetrically at the somatic golgi and are guided via Kinesin2 to maintain polarity within neurons
Source: eLife. 2020 Jul 13;9:e58943. doi: 10.7554/eLife.58943 (PMC7394546; doi:10.7554/eLife.58943)
Supplement: Figure 7—source data 1. [file elife-58943-fig7-data1.xlsx]

## Sheet: 94h1-1
	date	RNAi	movie name	comet number	in first frame	origin (soma, dendrite,axon)	approach axon/dendrite/no	enter axon/dendrite	polarity	angle of comet from axon	Turning events
	2019-06-17	37CRNAI	94h1-1	1	y	s	n	n/a	n/a
	2019-06-17	37CRNAI	94h1-1	2	y	s	n	n/a	n/a
	2019-06-17	37CRNAI	94h1-1	3	y	s	n	n/a	n/a
	2019-06-17	37CRNAI	94h1-1	4	y	s	n	n/a	n/a
	2019-06-17	37CRNAI	94h1-1	5	y	s	d	n	n/a
	2019-06-17	37CRNAI	94h1-1	6	y	d	n	n/a	r
	2019-06-17	37CRNAI	94h1-1	7	y	s	a	n	n/a
	2019-06-17	37CRNAI	94h1-1	8	y	s	a	y	a
	2019-06-17	37CRNAI	94h1-1	9	y	s	a	n	n/a
	2019-06-17	37CRNAI	94h1-1	10	y	s	a	n	n/a
	2019-06-17	37CRNAI	94h1-1	11	y	s	a	n	n/a
	2019-06-17	37CRNAI	94h1-1	12	n	d	a	n	r		n
	2019-06-17	37CRNAI	94h1-1	13	n	s	n	n/a	n/a	4.241	n/a
	2019-06-17	37CRNAI	94h1-1	14	y	s	n	n/a	n/a
	2019-06-17	37CRNAI	94h1-1	15	y	d	n	n/a	n/a (1 frame)
	2019-06-17	37CRNAI	94h1-1	17	n	s	n	n/a	n/a	27.771	y
	2019-06-17	37CRNAI	94h1-1	18	n	s	n	n/a	n/a	130.858	n/a
	2019-06-17	37CRNAI	94h1-1	19	y	s	n	n/a	n/a
	2019-06-17	37CRNAI	94h1-1	20	n	s	d	n	n/a	153.175	n
	2019-06-17	37CRNAI	94h1-1	21	n	s	n	n/a	n/a	11.706	n
	2019-06-17	37CRNAI	94h1-1	22	n	s	n	n/a	n/a	8.994	n/a
	2019-06-17	37CRNAI	94h1-1	23	n	s	n	n/a	n/a	5.28	y
	2019-06-17	37CRNAI	94h1-1	24	y	s	n	n/a	n/a
	2019-06-17	37CRNAI	94h1-1	25	n	s	n	n/a	n/a	37.676	n/a
	2019-06-17	37CRNAI	94h1-1	26	n	s	d	n	n/a	117.546	n
	2019-06-17	37CRNAI	94h1-1	27	n	d	n	n/a	n/a (1 frame)		n/a
	2019-06-17	37CRNAI	94h1-1	28	n	d	n	n/a	a		n/a
	2019-06-17	37CRNAI	94h1-1	29	y	d	n	n/a	r
	2019-06-17	37CRNAI	94h1-1	30	n	d	n	n/a	r		n/a
	2019-06-17	37CRNAI	94h1-1	31	n	d	n	n/a	r		n/a
	2019-06-17	37CRNAI	94h1-1	32	n	d	n	n/a	r		n
	2019-06-17	37CRNAI	94h1-1	33	y	s	a	y	a
	2019-06-17	37CRNAI	94h1-1	34	y	s	n	n/a	n/a
	2019-06-17	37CRNAI	94h1-1	36	y	s	n	n/a	n/a
	2019-06-17	37CRNAI	94h1-1	37	n	s	a	n	n/a	0.711	y
	2019-06-17	37CRNAI	94h1-1	38	n	s	a	y	a	8.122	y
	2019-06-17	37CRNAI	94h1-1	39	y	s	n	n/a	n/a
	2019-06-17	37CRNAI	94h1-1	40	n	s	n	n/a	n/a	1.312	n/a
	2019-06-17	37CRNAI	94h1-1	41	n	s	n	n/a	n/a	10.846	n/a
	2019-06-17	37CRNAI	94h1-1	42	n	s	n	n/a	n/a	35.006	n/a
	2019-06-17	37CRNAI	94h1-1	43	n	s	n	n/a	n/a	31.663	y
	2019-06-17	37CRNAI	94h1-1	44	n	s	n	n/a	n/a	155.684	n/a
	2019-06-17	37CRNAI	94h1-1	45	n	s	n	n/a	n/a	157.676	n/a
	2019-06-17	37CRNAI	94h1-1	46	n	d	n	n/a	r		y
	2019-06-17	37CRNAI	94h1-1	47	n	d	n	n/a	r		n/a
	2019-06-17	37CRNAI	94h1-1	48	n	d	n	n/a	r		n/a
	2019-06-17	37CRNAI	94h1-1	49	n	s	n	n/a	n/a	51.475	n/a
	2019-06-17	37CRNAI	94h1-1	50	n	s	n	n/a	n/a	110.397	n/a
	2019-06-17	37CRNAI	94h1-1	52	n	s	n	n/a	n/a	2.31	y
	2019-06-17	37CRNAI	94h1-1	53	n	d	n	n/a	r		n/a
	2019-06-17	37CRNAI	94h1-1	54	n	d	n	n/a	a		n/a
	2019-06-17	37CRNAI	94h1-1	55	n	s	n	n/a	n/a	17.969	y
	2019-06-17	37CRNAI	94h1-1	56	n	s	d	n	n/a	171.112	n/a
	2019-06-17	37CRNAI	94h1-1	57	n	s	n	n/a	n/a	n/a	n/a
	2019-06-17	37CRNAI	94h1-1	58	n	s	n	n/a	n/a	n/a	n/a
	2019-06-17	37CRNAI	94h1-1	59	n	s	a	n	n/a	62.92	y
	2019-06-17	37CRNAI	94h1-1	60	n	d	n	n/a	r		n/a
	2019-06-17	37CRNAI	94h1-1	61	n	s	n	n/a	n/a	30.811	n
	2019-06-17	37CRNAI	94h1-1	62	n	d	n	n/a	r		y
	2019-06-17	37CRNAI	94h1-1	63	n	s	n	n/a	n/a	29.002	n/a
	2019-06-17	37CRNAI	94h1-1	64	n	s	n	n/a	n/a	4.378	n/a
	2019-06-17	37CRNAI	94h1-1	65	n	s	n	n/a	n/a	34.073	n/a
	2019-06-17	37CRNAI	94h1-1	67	n	s	n	n/a	n/a	22.788	n/a
	2019-06-17	37CRNAI	94h1-1	68	n	s	d	n	n/a	129.872	n/a
	2019-06-17	37CRNAI	94h1-1	69	n	s	n	n/a	n/a	n/a	n/a
	2019-06-17	37CRNAI	94h1-1	70	n	s	n	n/a	n/a	45.11	n/a
	2019-06-17	37CRNAI	94h1-1	72	n	d	n	n/a	r		n/a
	2019-06-17	37CRNAI	94h1-1	73	n	d	n	n/a	r		n/a
	2019-06-17	37CRNAI	94h1-1	74	n	d	n	n/a	r		n/a
	2019-06-17	37CRNAI	94h1-1	75	n	a	n	n/a	n/a		n/a
	2019-06-17	37CRNAI	94h1-1	76	n	d	n	n/a	r		n/a
	2019-06-17	37CRNAI	94h1-1	77	n	s	a	y	n/a	25.567	n/a
	2019-06-17	37CRNAI	94h1-1	78	n	s	n	n/a	n/a	0.015	y
	2019-06-17	37CRNAI	94h1-1	79	n	d	n	n/a	r		n/a
	2019-06-17	37CRNAI	94h1-1	80	n	d	n	n/a	r		y
	2019-06-17	37CRNAI	94h1-1	81	n	d	n	n/a	a		n/a
	2019-06-17	37CRNAI	94h1-1	82	n	d	n	n/a	a		n/a
	2019-06-17	37CRNAI	94h1-1	83	n	s	n	n/a	n/a	n/a	y
	2019-06-17	37CRNAI	94h1-1	84	n	s	n	n/a	n/a	6.911	n/a
	2019-06-17	37CRNAI	94h1-1	85	n	s	n	n/a	n/a	n/a	n/a
	2019-06-17	37CRNAI	94h1-1	86	n	s	n	n/a	n/a	n/a	n/a
	2019-06-17	37CRNAI	94h1-1	88	n	s	n	n/a	n/a	30.602	n/a

## Sheet: 94h_2
	date	RNAi	movie name	comet number	in first frame	origin (soma, dendrite,axon)	approach axon/dendrite/no	enter axon/dendrite	polarity	angle from axon	Turning events
	2019-06-17	37CRNAI	94h_2	1	y	a	n	n/a	a
	2019-06-17	37CRNAI	94h_2	2	y	a	n	n/a	a
	2019-06-17	37CRNAI	94h_2	3	n	s	n	n/a	n/a	166.507	n/a
	2019-06-17	37CRNAI	94h_2	4	n	s	a	n	n/a	0	n/a
	2019-06-17	37CRNAI	94h_2	5	n	s	a	n	n/a	8.673	n/a
	2019-06-17	37CRNAI	94h_2	6	n	s	n	n/a	n/a	124.695	n/a
	2019-06-17	37CRNAI	94h_2	7	n	a	n	n/a	a		n/a
	2019-06-17	37CRNAI	94h_2	8	n	s	n	n/a	n/a	113.444	n
	2019-06-17	37CRNAI	94h_2	9	y	d	n	n/a	r
	2019-06-17	37CRNAI	94h_2	10	y	d	n	n/a	r
	2019-06-17	37CRNAI	94h_2	11	n	d	n	n/a	r		n/a
	2019-06-17	37CRNAI	94h_2	12	n	d	n	n/a	r		n/a
	2019-06-17	37CRNAI	94h_2	13	n	s	n	n/a	n/a	28.413	n/a
	2019-06-17	37CRNAI	94h_2	14	n	s	n	n/a	n/a	n/a	n/a
	2019-06-17	37CRNAI	94h_2	16	n	a	n	n/a	a		n/a
	2019-06-17	37CRNAI	94h_2	17	n	a	a	y	a		n/a
	2019-06-17	37CRNAI	94h_2	18	n	d	n	n/a	r		n/a
	2019-06-17	37CRNAI	94h_2	19	n	d	n	n/a	r		n/a
	2019-06-17	37CRNAI	94h_2	20	n	d	n	n/a	r		n/a
	2019-06-17	37CRNAI	94h_2	21	n	d	n	n/a	r		n/a
	2019-06-17	37CRNAI	94h_2	23	n	d	n	n/a	r		n/a
	2019-06-17	37CRNAI	94h_2	24	n	d	n	n/a	r		n/a
	2019-06-17	37CRNAI	94h_2	25	n	d	n	n/a	n/a		n/a

## Sheet: 94h_3
	date	RNAi	movie name	comet number	in first frame	origin (soma, dendrite,axon)	approach axon/dendrite/no	enter axon/dendrite	polarity	angle from axon	Turning events
	2019-06-17	37CRNAI	94h_3	1	y	s	n	n/a	n/a
	2019-06-17	37CRNAI	94h_3	2	n	s	d	n	n/a	97.886	n/a
	2019-06-17	37CRNAI	94h_3	3	n	s	n	n/a	n/a	n/a	n/a
	2019-06-17	37CRNAI	94h_3	4	n	s	n	n/a	n/a	71.565	y
	2019-06-17	37CRNAI	94h_3	5	y	s	n	n/a	n/a
	2019-06-17	37CRNAI	94h_3	6	y	s	n	n/a	n/a
	2019-06-17	37CRNAI	94h_3	7	n	s	n	n/a	n/a	n/a	n/a
	2019-06-17	37CRNAI	94h_3	8	n	s	n	n/a	n/a	164.358	n/a
	2019-06-17	37CRNAI	94h_3	9	n	s	n	n/a	n/a	n/a	n/a
	2019-06-17	37CRNAI	94h_3	10	y	d	n	n/a	r
	2019-06-17	37CRNAI	94h_3	11	y	d	n	n/a	n/a
	2019-06-17	37CRNAI	94h_3	12	n	s	n	n/a	n/a	23.009	n/a
	2019-06-17	37CRNAI	94h_3	13	y	s	n	n/a	n/a
	2019-06-17	37CRNAI	94h_3	14	n	s	n	n/a	n/a	18.625	n/a
	2019-06-17	37CRNAI	94h_3	15	y	s	n	n/a	n/a
	2019-06-17	37CRNAI	94h_3	16	y	s	n	n/a	n/a
	2019-06-17	37CRNAI	94h_3	17	n	s	a	y	n/a	22.62	n/a
	2019-06-17	37CRNAI	94h_3	18	n	s	a	n	n/a	15.832	n/a
	2019-06-17	37CRNAI	94h_3	19	n	d	n	n/a	r		n/a
	2019-06-17	37CRNAI	94h_3	20	n	d	n	n/a	r		n/a
	2019-06-17	37CRNAI	94h_3	21	y	d	n	n/a	r
	2019-06-17	37CRNAI	94h_3	22	n	d	n	n/a	r		n/a
	2019-06-17	37CRNAI	94h_3	23	n	d	n	n/a	r		n/a
	2019-06-17	37CRNAI	94h_3	24	n	d	n	n/a	r		n/a
	2019-06-17	37CRNAI	94h_3	25	n	s	n	n/a	n/a	125.059	y
	2019-06-17	37CRNAI	94h_3	27	n	s	n	n/a	n/a	167.807	n/a
	2019-06-17	37CRNAI	94h_3	28	n	s	n	n/a	n/a	21.705	y
	2019-06-17	37CRNAI	94h_3	29	n	s	n	n/a	n/a	127.322	y
	2019-06-17	37CRNAI	94h_3	30	n	s	n	n/a	n/a	43.428	y
	2019-06-17	37CRNAI	94h_3	31	n	s	n	n/a	n/a	24.294	y
	2019-06-17	37CRNAI	94h_3	32	n	s	n	n/a	n/a	2.361	n/a
	2019-06-17	37CRNAI	94h_3	33	n	s	n	n/a	n/a	162.542	n
	2019-06-17	37CRNAI	94h_3	34	n	a	n	n/a	a		n/a
	2019-06-17	37CRNAI	94h_3	35	n	s	n	n/a	n/a	7.913	n
	2019-06-17	37CRNAI	94h_3	36	n	s	a	n	n/a	7.125	n/a
	2019-06-17	37CRNAI	94h_3	37	n	s	n	n/a	n/a	n/a	n/a
	2019-06-17	37CRNAI	94h_3	38	n	s	n	n/a	n/a	n/a	n/a
	2019-06-17	37CRNAI	94h_3	39	n	s	n	n/a	n/a	n/a	n/a
	2019-06-17	37CRNAI	94h_3	40	n	s	a	y	4	0.398	n/a
	2019-06-17	37CRNAI	94h_3	41	n	s	n	n/a	n/a	n/a	n/a
	2019-06-17	37CRNAI	94h_3	43	n	s	d	n	n/a	132.523	n/a
	2019-06-17	37CRNAI	94h_3	44	y	a	n	n/a	a
	2019-06-17	37CRNAI	94h_3	45	y	a	n	n/a	a
	2019-06-17	37CRNAI	94h_3	46	n	a	n	n/a	a		n/a
	2019-06-17	37CRNAI	94h_3	47	n	a	n	n/a	a		n/a
	2019-06-17	37CRNAI	94h_3	48	n	a	n	n/a	a		n/a
	2019-06-17	37CRNAI	94h_3	49	n	a	n	n/a	a		n/a
	2019-06-17	37CRNAI	94h_3	51	n	d	n	n/a	r		n/a

## Sheet: 94h_5
	date	RNAi	movie name	comet number	in first frame	origin (soma, dendrite,axon)	approach axon/dendrite/no	enter axon/dendrite	polarity	angle from axon		Turning events
	2019-06-17	37CRNAI	94h_3	1	y	s	a	n	n/a
	2019-06-17	37CRNAI	94h_3	2	y	s	a	y	n/a
	2019-06-17	37CRNAI	94h_3	3	n	s	n	n/a	n/a	10.763		n/a
	2019-06-17	37CRNAI	94h_3	4	n	s	a	y	n/a	12.165		n/a
	2019-06-17	37CRNAI	94h_3	5	y	a	n	n/a	a
	2019-06-17	37CRNAI	94h_3	6	y	a	n	n/a	a
	2019-06-17	37CRNAI	94h_3	7	n	a	n	n/a	a			n/a
	2019-06-17	37CRNAI	94h_3	8	y	a	n	n/a	a
	2019-06-17	37CRNAI	94h_3	9	n	a	n	n/a	a			n/a
	2019-06-17	37CRNAI	94h_3	10	n	a	n	n/a	a			n/a
	2019-06-17	37CRNAI	94h_3	11	n	s	a	n	n/a	3.621		n/a
	2019-06-17	37CRNAI	94h_3	12	n	s	n	n/a	n/a	174.256		n
	2019-06-17	37CRNAI	94h_3	13	n	s	n	n/a	n/a	34.144		n/a
	2019-06-17	37CRNAI	94h_3	14	y	d	n	n/a	r
	2019-06-17	37CRNAI	94h_3	15	y	d	n	n/a	r
	2019-06-17	37CRNAI	94h_3	16	n	d	n	n/a	r			n/a
	2019-06-17	37CRNAI	94h_3	17	n	d	n	n/a	a			n/a
	2019-06-17	37CRNAI	94h_3	18	n	d	n	n/a	r			y
	2019-06-17	37CRNAI	94h_3	19	y	d	n	n/a	r
	2019-06-17	37CRNAI	94h_3	21	n	s	d	y	n/a	89.537	this looks like a minus end	n/a
	2019-06-17	37CRNAI	94h_3	22	n	d	n	n/a	r			n/a
	2019-06-17	37CRNAI	94h_3	23	y	d	n	n/a	r
	2019-06-17	37CRNAI	94h_3	24	y	d	n	n/a	n/a
	2019-06-17	37CRNAI	94h_3	25	n	d	n	n/a	r			n/a
	2019-06-17	37CRNAI	94h_3	26	n	d	n	n/a	r			n/a
	2019-06-17	37CRNAI	94h_3	27	n	d	n	n/a	r			n/a
	2019-06-17	37CRNAI	94h_3	28	n	d	n	n/a	r			n/a
	2019-06-17	37CRNAI	94h_3	30	n	d	n	n/a	r			y
	2019-06-17	37CRNAI	94h_3	31	n	d	n	n/a	r			n/a
	2019-06-17	37CRNAI	94h_3	32	n	d	n	n/a	r			n/a
	2019-06-17	37CRNAI	94h_3	33	n	d	n	n/a	r			n/a
	2019-06-17	37CRNAI	94h_3	35	n	d	n	n/a	r			n/a
	2019-06-17	37CRNAI	94h_3	36	n	d	n	n/a	r			n/a
	2019-06-17	37CRNAI	94h_3	38	y	s	n	n/a	n/a
	2019-06-17	37CRNAI	94h_3	39	n	s	n	n/a	n/a	73.847		n/a
	2019-06-17	37CRNAI	94h_3	41	n	s	n	n/a	n/a	n/a		n/a
	2019-06-17	37CRNAI	94h_3	42	n	s	n	n/a	n/a	70.956		y
	2019-06-17	37CRNAI	94h_3	43	n	d	n	n/a	r			n
	2019-06-17	37CRNAI	94h_3	44	n	d	n	n/a	r			n/a
	2019-06-17	37CRNAI	94h_3	45	n	d	n	n/a	r			n/a
	2019-06-17	37CRNAI	94h_3	46	n	d	n	n/a	r			n/a
	2019-06-17	37CRNAI	94h_3	47	n	d	n	n/a	r			n
	2019-06-17	37CRNAI	94h_3	48	n	s	n	n/a	n/a	n/a		n/a
	2019-06-17	37CRNAI	94h_3	49	n	d	n	n/a	r			n/a
	2019-06-17	37CRNAI	94h_3	50	n	s	n	n/a	n/a	12.724		n
	2019-06-17	37CRNAI	94h_3	51	n	s	a	y	n/a	5.847		n/a
	2019-06-17	37CRNAI	94h_3	52	y	s	n	n/a	n/a
	2019-06-17	37CRNAI	94h_3	53	n	s	n	n/a	n/a	36.601		y
	2019-06-17	37CRNAI	94h_3	54	n	s	n	n/a	n/a	101.42		n
	2019-06-17	37CRNAI	94h_3	55	n	s	n	n/a	n/a	65.989		y
	2019-06-17	37CRNAI	94h_3	56	n	s	n	n/a	n/a	120.964		n/a
	2019-06-17	37CRNAI	94h_3	57	y	s	n	n/a	n/a
	2019-06-17	37CRNAI	94h_3	58	n	s	n	n/a	n/a	92.14		n/a
	2019-06-17	37CRNAI	94h_3	59	n	s	a	n	n/a	11.665		y
	2019-06-17	37CRNAI	94h_3	60	n	s	n	n/a	n/a	n/a		n/a
	2019-06-17	37CRNAI	94h_3	61	n	s	n	n/a	n/a	13.936		y
	2019-06-17	37CRNAI	94h_3	62	y	s	n	n/a	n/a
	2019-06-17	37CRNAI	94h_3	64	y	s	n	n/a	n/a
	2019-06-17	37CRNAI	94h_3	65	n	s	n	n/a	n/a	163.257		n/a
	2019-06-17	37CRNAI	94h_3	66	n	s	n	n/a	n/a	41.82		n/a
	2019-06-17	37CRNAI	94h_3	67	n	s	n	n/a	n/a	170.329		n/a
	2019-06-17	37CRNAI	94h_3	68	n	s	n	n/a	n/a	54.866		n/a
	2019-06-17	37CRNAI	94h_3	69	n	s	a	y	n/a	31.851		y
	2019-06-17	37CRNAI	94h_3	70	n	s	n	n/a	n/a	n/a		n/a
	2019-06-17	37CRNAI	94h_3	71	n	s	n	n/a	n/a	6.783		n/a
	2019-06-17	37CRNAI	94h_3	72	n	s	n	n/a	n/a	174.019		n/a
	2019-06-17	37CRNAI	94h_3	73	n	s	a	n	n/a	8.448		n/a
	2019-06-17	37CRNAI	94h_3	74	n	s	n	n/a	n/a	28.861		y
	2019-06-17	37CRNAI	94h_3	75	n	s	n	n/a	n/a	47.031		n/a
	2019-06-17	37CRNAI	94h_3	76	n	s	n	n/a	n/a	12.719		y
	2019-06-17	37CRNAI	94h_3	77	n	s	n	n/a	n/a	1.296		n/a
	2019-06-17	37CRNAI	94h_3	78	n	s	n	n/a	n/a	0.616		n/a
	2019-06-17	37CRNAI	94h_3	79	n	d	n	n/a	r			n/a
	2019-06-17	37CRNAI	94h_3	80	n	s	n	n/a	n/a	52.547		n/a
	2019-06-17	37CRNAI	94h_3	82	n	d	n	n/a	r			y
	2019-06-17	37CRNAI	94h_3	83	n	d	n	n/a	r			n/a
	2019-06-17	37CRNAI	94h_3	84	n	d	n	n/a	r			n/a
	2019-06-17	37CRNAI	94h_3	85	n	d	n	n/a	r			n/a
	2019-06-17	37CRNAI	94h_3	86	n	s	n	n/a	n/a	179.95		n/a
	2019-06-17	37CRNAI	94h_3	87	n	s	n	n/a	n/a	135.719		n/a
	2019-06-17	37CRNAI	94h_3	88	n	s	n	n/a	n/a			n/a
	2019-06-17	37CRNAI	94h_3	89	n	s	n	n/a	n/a	68.28		n/a
	2019-06-17	37CRNAI	94h_3	90	n	s	n	n/a	n/a	4.676		n/a
	2019-06-17	37CRNAI	94h_3	91	n	s	n	n/a	n/a	136.165		n/a
	2019-06-17	37CRNAI	94h_3	92	n	s	a	n	n/a	6.366		n/a
	2019-06-17	37CRNAI	94h_3	94	n	s	n	n/a	n/a	21.088		n
	2019-06-17	37CRNAI	94h_3	95	n	s	n	n/a	n/a	17.021		n
	2019-06-17	37CRNAI	94h_3	96	n	s	n	n/a	n/a	15.562		n
	2019-06-17	37CRNAI	94h_3	98	n	s	n	n/a	n/a	9.52		n/a
	2019-06-17	37CRNAI	94h_3	100	n	s	a	y	n/a	19.44		n/a
	2019-06-17	37CRNAI	94h_3	102	n	s	n	n/a	n/a	16.184		n/a
	2019-06-17	37CRNAI	94h_3	103	n	s	n	n/a	n/a	52.723		y
	2019-06-17	37CRNAI	94h_3	104	n	s	n	n/a	n/a	36.237		y
	2019-06-17	37CRNAI	94h_3	105	n	s	n	n/a	n/a	41.594		n/a
	2019-06-17	37CRNAI	94h_3	106	n	s	n	n/a	n/a	44.147		n/a
	2019-06-17	37CRNAI	94h_3	107	n	s	n	n/a	n/a	15.619		n/a
	2019-06-17	37CRNAI	94h_3	109	y	a	n	n/a	a
	2019-06-17	37CRNAI	94h_3	110	n	s	n	n/a	n/a	179.15		y
	2019-06-17	37CRNAI	94h_3	111	n	s	n	n/a	n/a	67.318		n
	2019-06-17	37CRNAI	94h_3	112	n	s	n	n/a	n/a	95.819		n/a
	2019-06-17	37CRNAI	94h_3	113	n	s	n	n/a	n/a	82.376		n/a
	2019-06-17	37CRNAI	94h_3	114	n	s	n	n/a	n/a	36.399		n/a
	2019-06-17	37CRNAI	94h_3	115	n	s	n	n/a	n/a	40.986		n/a
	2019-06-17	37CRNAI	94h_3	116	n	s	n	n/a	n/a	n/a		n/a

## Sheet: 94hAPF_1
	date	RNAi	movie name	comet number	in first frame	origin (soma, dendrite,axon)	approach axon/dendrite/no	enter axon/dendrite	polarity	angle from axon	Turning events
	2019-06-18	37CRNAI	94hAPF_1	1	y	d	n	n/a	r
	2019-06-18	37CRNAI	94hAPF_1	2	y	d	n	n/a	r/a (turn)
	2019-06-18	37CRNAI	94hAPF_1	3	y	s	n	n/a	n/a
	2019-06-18	37CRNAI	94hAPF_1	4	y	s	n	n/a	n/a
	2019-06-18	37CRNAI	94hAPF_1	5	n	s	n	n/a	n/a	28.496	n/a
	2019-06-18	37CRNAI	94hAPF_1	6	y	s	n	n/a	n/a
	2019-06-18	37CRNAI	94hAPF_1	7	y	d	n	n/a	r
	2019-06-18	37CRNAI	94hAPF_1	8	n	s	n	n/a	n/a	1.947	n/a
	2019-06-18	37CRNAI	94hAPF_1	9	y	s	a	y	n/a
	2019-06-18	37CRNAI	94hAPF_1	10	n	s	n	n/a	n/a	41.648	y
	2019-06-18	37CRNAI	94hAPF_1	11	n	s	n	n/a	n/a	152.4	y
	2019-06-18	37CRNAI	94hAPF_1	12	n	s	n	n/a	n/a	49.764	n/a
	2019-06-18	37CRNAI	94hAPF_1	13	n	s	a	y	n/a	3.366	n/a
	2019-06-18	37CRNAI	94hAPF_1	14	n	s	n	n/a	n/a	17.494	n/a
	2019-06-18	37CRNAI	94hAPF_1	15	n	s	n	n/a	n/a	19.312	y
	2019-06-18	37CRNAI	94hAPF_1	16	n	s	n	n/a	n/a	59.903	n/a
	2019-06-18	37CRNAI	94hAPF_1	17	n	s	n	n/a	n/a	133.693	n/a
	2019-06-18	37CRNAI	94hAPF_1	19	y	a	n	n/a	a
	2019-06-18	37CRNAI	94hAPF_1	20	n	s	n	n/a	n/a	n/a	n/a
	2019-06-18	37CRNAI	94hAPF_1	21	y	d	n	n/a	r
	2019-06-18	37CRNAI	94hAPF_1	22	y	d	n	n/a	r
	2019-06-18	37CRNAI	94hAPF_1	23	n	d	n	n/a	r		n/a
	2019-06-18	37CRNAI	94hAPF_1	24	n	d	n	n/a	r		n/a
	2019-06-18	37CRNAI	94hAPF_1	25	n	d	n	n/a	a		n/a
	2019-06-18	37CRNAI	94hAPF_1	26	n	d	n	n/a	a		n/a
	2019-06-18	37CRNAI	94hAPF_1	27	n	d	n	n/a	r		n/a
	2019-06-18	37CRNAI	94hAPF_1	28	n	d	n	n/a	r		n/a
	2019-06-18	37CRNAI	94hAPF_1	29	n	d	n	n/a	a		n/a
	2019-06-18	37CRNAI	94hAPF_1	30	n	d	n	n/a	r		n/a
	2019-06-18	37CRNAI	94hAPF_1	31	n	d	n	n/a	r		n/a
	2019-06-18	37CRNAI	94hAPF_1	32	n	d	n	n/a	r		n/a
	2019-06-18	37CRNAI	94hAPF_1	34	n	d	n	n/a	r		n/a
	2019-06-18	37CRNAI	94hAPF_1	35	n	d	n	n/a	r/a (turn)		n/a
	2019-06-18	37CRNAI	94hAPF_1	37	n	d	n	n/a	r		n/a
	2019-06-18	37CRNAI	94hAPF_1	38	n	d	n	n/a	r		n/a
	2019-06-18	37CRNAI	94hAPF_1	40	n	d	n	n/a	r		n/a
	2019-06-18	37CRNAI	94hAPF_1	41	n	d	n	n/a	r		n/a
	2019-06-18	37CRNAI	94hAPF_1	42	n	d	n	n/a	r		n/a
	2019-06-18	37CRNAI	94hAPF_1	43	n	d	n	n/a	n/a		n/a
	2019-06-18	37CRNAI	94hAPF_1	44	n	d	n	n/a	r		n/a
	2019-06-18	37CRNAI	94hAPF_1	45	n	d	n	n/a	r		n/a
	2019-06-18	37CRNAI	94hAPF_1	47	n	d	n	n/a	r		n/a
	2019-06-18	37CRNAI	94hAPF_1	51	n	s	n	n/a	n/a	88.176	n/a
	2019-06-18	37CRNAI	94hAPF_1	52	n	s	n	n/a	n/a	n/a	n/a
												1
												2
												3
												4
												5
												6
												7
												8
												9
												10
												11

## Sheet: 94hAPF_6
	date	RNAi	movie name	comet number	in first frame	origin (soma, dendrite,axon)	approach axon/dendrite/no	enter axon/dendrite	polarity	angle from axon	Turning events
	2019-06-18	37CRNAI	94hAPF_6	1	y	s	n	n/a	n/a
	2019-06-18	37CRNAI	94hAPF_6	2	y	d	n	n/a	r
	2019-06-18	37CRNAI	94hAPF_6	3	y	a	n	n/a	a
	2019-06-18	37CRNAI	94hAPF_6	4	y	s	a	y	n/a
	2019-06-18	37CRNAI	94hAPF_6	5	n	s	a	y	n/a	42.274	n
	2019-06-18	37CRNAI	94hAPF_6	6	n	a	n	n/a	a		n/a
	2019-06-18	37CRNAI	94hAPF_6	7	n	s	n	n/a	n/a	83.234	n/a
	2019-06-18	37CRNAI	94hAPF_6	8	n	s	n	n/a	n/a	76.264	n/a
	2019-06-18	37CRNAI	94hAPF_6	9	n	s	a	n	n/a	0.731	y
	2019-06-18	37CRNAI	94hAPF_6	10	n	s	a	y	n/a	4.399	n/a
	2019-06-18	37CRNAI	94hAPF_6	11	y	s	n	n/a	n/a
	2019-06-18	37CRNAI	94hAPF_6	12	n	d	n	n/a	r		n/a
	2019-06-18	37CRNAI	94hAPF_6	13	n	s	d	n	n/a	148.389	n/a
	2019-06-18	37CRNAI	94hAPF_6	14	n	d	n	n/a	r		n/a
	2019-06-18	37CRNAI	94hAPF_6	15	n	d	n	n/a	r		n/a
	2019-06-18	37CRNAI	94hAPF_6	16	n	d	n	n/a	r		n/a
	2019-06-18	37CRNAI	94hAPF_6	17	n	s	n	n/a	n/a	145.954	n
	2019-06-18	37CRNAI	94hAPF_6	18	n	s	n	n/a	n/a	171.193	n/a
	2019-06-18	37CRNAI	94hAPF_6	19	n	s	a	y	n/a	15.709	y
	2019-06-18	37CRNAI	94hAPF_6	20	n	s	n	n/a	n/a	71.822	y
	2019-06-18	37CRNAI	94hAPF_6	21	n	s	n	n/a	n/a	98.658	n/a
	2019-06-18	37CRNAI	94hAPF_6	22	n	s	n	n/a	n/a	154.406	n/a
	2019-06-18	37CRNAI	94hAPF_6	23	n	s	a	n	n/a	16.993	y
	2019-06-18	37CRNAI	94hAPF_6	24	n	s	a	y	n/a	24.075	n
	2019-06-18	37CRNAI	94hAPF_6	25	n	s	n	n/a	n/a	80.009	n/a
	2019-06-18	37CRNAI	94hAPF_6	26	n	s	n	n/a	n/a	91.134	n/a
	2019-06-18	37CRNAI	94hAPF_6	27	n	a	n	n/a	r		n/a
	2019-06-18	37CRNAI	94hAPF_6	29	n	d	n	n/a	r		n/a
	2019-06-18	37CRNAI	94hAPF_6	30	n	d	n	n/a	r		n/a
	2019-06-18	37CRNAI	94hAPF_6	31	n	d	n	n/a	r		n/a
	2019-06-18	37CRNAI	94hAPF_6	32	n	d	n	n/a	r		n/a
	2019-06-18	37CRNAI	94hAPF_6	33	n	d	n	n/a	r		n/a
	2019-06-18	37CRNAI	94hAPF_6	35	n	s	n	n/a	n/a	101.264	n/a
	2019-06-18	37CRNAI	94hAPF_6	36	n	s	n	n/a	n/a	n/a	n/a

## Sheet: 94hAPF_7
	date	RNAi	movie name	comet number	in first frame	origin (soma, dendrite,axon)	approach axon/dendrite/no	enter axon/dendrite	polarity	angle from axon	Turning events
	2019-06-18	37CRNAI	94hAPF_7	1	y	a	n	n/a	a
	2019-06-18	37CRNAI	94hAPF_7	2	y	a	n	n/a	a
	2019-06-18	37CRNAI	94hAPF_7	3	y	a	n	n/a	a
	2019-06-18	37CRNAI	94hAPF_7	4	y	d	n	n/a	n/a
	2019-06-18	37CRNAI	94hAPF_7	5	n	s	n	n/a	n/a	135.282	n/a
	2019-06-18	37CRNAI	94hAPF_7	6	n	s	n	n/a	n/a	135.995	n/a
	2019-06-18	37CRNAI	94hAPF_7	7	n	s	n	n/a	n/a	71.106	y
	2019-06-18	37CRNAI	94hAPF_7	8	n	s	n	n/a	n/a	n/a	n
	2019-06-18	37CRNAI	94hAPF_7	9	n	s	n	n/a	n/a	156.337	n/a
	2019-06-18	37CRNAI	94hAPF_7	10	n	s	n	n/a	n/a	96.489	n
	2019-06-18	37CRNAI	94hAPF_7	11	n	s	n	n/a	n/a	91.637	n/a
	2019-06-18	37CRNAI	94hAPF_7	12	n	d	n	n/a	r		n/a
	2019-06-18	37CRNAI	94hAPF_7	13	n	d	n	n/a	r		n/a
	2019-06-18	37CRNAI	94hAPF_7	14	n	s	n	n/a	n/a	86.348	n/a
	2019-06-18	37CRNAI	94hAPF_7	16	n	s	n	n/a	n/a	20.294	n
	2019-06-18	37CRNAI	94hAPF_7	17	n	s	n	n/a	n/a	141.654	n/a
	2019-06-18	37CRNAI	94hAPF_7	18	y	s	n	n/a	n/a
	2019-06-18	37CRNAI	94hAPF_7	19	n	a	n	n/a	a		n/a
	2019-06-18	37CRNAI	94hAPF_7	20	n	s	n	n/a	n/a	35.446	n/a
	2019-06-18	37CRNAI	94hAPF_7	21	n	s	n	n/a	n/a	54.189	n/a
	2019-06-18	37CRNAI	94hAPF_7	22	n	s	n	n/a	n/a	n/a	n/a
	2019-06-18	37CRNAI	94hAPF_7	23	n	a	n	n/a	a		n/a
	2019-06-18	37CRNAI	94hAPF_7	24	n	a	n	n/a	a		n/a

## Sheet: 94hAPF_4
	date	RNAi	movie name	comet number	in first frame	origin (soma, dendrite,axon)	approach axon/dendrite/no	enter axon/dendrite	polarity	angle of comet from axon		Turning events
	2019-06-18	37CRNAI	94hAPF_4	1	y	s	a	y	n/a
	2019-06-18	37CRNAI	94hAPF_4	2	y	s	n	n/a	n/a
	2019-06-18	37CRNAI	94hAPF_4	3	y	s	a	y	n/a
	2019-06-18	37CRNAI	94hAPF_4	4	y	s	n	n/a	n/a
	2019-06-18	37CRNAI	94hAPF_4	5	y	s	n	n/a	n/a
	2019-06-18	37CRNAI	94hAPF_4	6	y	s	n	n/a	n/a
	2019-06-18	37CRNAI	94hAPF_4	7	n	s	n	n/a	n/a	1	16.596	n/a
	2019-06-18	37CRNAI	94hAPF_4	8	n	s	n	n/a	n/a	3	97.738	n/a
	2019-06-18	37CRNAI	94hAPF_4	9	y	s	n	n/a	n/a
	2019-06-18	37CRNAI	94hAPF_4	10	n	s	n	n/a	n/a	4	89.157	n/a
	2019-06-18	37CRNAI	94hAPF_4	11	n	s	n	n/a	n/a	24	59.621	n/a
	2019-06-18	37CRNAI	94hAPF_4	12	y	d	n	n/a	r
	2019-06-18	37CRNAI	94hAPF_4	13	y	d	n	n/a	r
	2019-06-18	37CRNAI	94hAPF_4	14	y	s	d	n	n/a
	2019-06-18	37CRNAI	94hAPF_4	15	n	s	a	y	n/a	16	39.094	n/a
	2019-06-18	37CRNAI	94hAPF_4	16	n	a	a	n	n/a			n/a
	2019-06-18	37CRNAI	94hAPF_4	17	n	s	a	n	n/a	25	47.974	y
	2019-06-18	37CRNAI	94hAPF_4	18	n	s	a	n	n/a	10	42.61	y
	2019-06-18	37CRNAI	94hAPF_4	19	n	s	a	y	n/a	11	42.886	y
	2019-06-18	37CRNAI	94hAPF_4	20	n	d	n	n/a	r			y
	2019-06-18	37CRNAI	94hAPF_4	22	n	s	n	n/a	n/a	14	178.62	n
	2019-06-18	37CRNAI	94hAPF_4	23	n	s	n	n/a	n/a	12	4.172	n/a
	2019-06-18	37CRNAI	94hAPF_4	24	n	s	n	n/a	n/a	6	30.376	n/a
	2019-06-18	37CRNAI	94hAPF_4	25	n	s	n	n/a	n/a	7	44.51	n/a
	2019-06-18	37CRNAI	94hAPF_4	26	n	s	d	n	n/a	9	146.608	n/a
	2019-06-18	37CRNAI	94hAPF_4	27	n	s	a	y	n/a	17	2.726	n/a
	2019-06-18	37CRNAI	94hAPF_4	28	n	s	n	n/a	n/a	26	14.234	n
	2019-06-18	37CRNAI	94hAPF_4	29	n	s	n	n/a	n/a	27	6.937	n
	2019-06-18	37CRNAI	94hAPF_4	30	n	s	a	n	n/a	15	44.635	n/a
	2019-06-18	37CRNAI	94hAPF_4	31	n	s	n	n/a	n/a	28	5.856	n/a
	2019-06-18	37CRNAI	94hAPF_4	32	n	s	a	n	n/a	19	2.023	n/a
	2019-06-18	37CRNAI	94hAPF_4	33	n	s	a	y	n/a	29	7.595	n/a
	2019-06-18	37CRNAI	94hAPF_4	35	n	s	a	y	n/a	30	12.579	n/a
	2019-06-18	37CRNAI	94hAPF_4	36	n	s	a	n	n/a	31	22.989	n/a
	2019-06-18	37CRNAI	94hAPF_4	37	n	d	n	n/a	r			y
	2019-06-18	37CRNAI	94hAPF_4	39	n	d	n	n/a	r			y
	2019-06-18	37CRNAI	94hAPF_4	40	n	s	n	n/a	n/a	32	78.69	n/a
	2019-06-18	37CRNAI	94hAPF_4	41	n	s	n	n/a	n/a	5	33.046	n/a
	2019-06-18	37CRNAI	94hAPF_4	42	n	s	n	n/a	n/a	33	147.313	n
	2019-06-18	37CRNAI	94hAPF_4	43	n	s	n	n/a	n/a	34	34.372	n/a
	2019-06-18	37CRNAI	94hAPF_4	44	n	s	n	n/a	n/a	13	3.167	n/a
	2019-06-18	37CRNAI	94hAPF_4	45	n	s	d	n	n/a	35	151.367	n/a
	2019-06-18	37CRNAI	94hAPF_4	46	n	s	d	n	n/a	36	148.187	n/a
	2019-06-18	37CRNAI	94hAPF_4	47	n	d	n	n/a	r			n/a
	2019-06-18	37CRNAI	94hAPF_4	48	n	d	n	n/a	r			y
	2019-06-18	37CRNAI	94hAPF_4	49	n	d	n	n/a	r			y
	2019-06-18	37CRNAI	94hAPF_4	51	n	s	n	n/a	n/a	37	80.06	y
	2019-06-18	37CRNAI	94hAPF_4	52	n	d	n	n/a	r			y
	2019-06-18	37CRNAI	94hAPF_4	53	n	s	n	n/a	n/a	18	72.536	y
	2019-06-18	37CRNAI	94hAPF_4	55	n	d	n	n/a	r			y
	2019-06-18	37CRNAI	94hAPF_4	57	y	s	n	n/a	n/a
	2019-06-18	37CRNAI	94hAPF_4	58	y	s	n	n/a	n/a
	2019-06-18	37CRNAI	94hAPF_4	59	n	s	n	n/a	n/a		n/a	n/a
	2019-06-18	37CRNAI	94hAPF_4	61	n	s	a	n	n/a	22	18.524	n
	2019-06-18	37CRNAI	94hAPF_4	62	n	d	n	n/a	r			n/a
	2019-06-18	37CRNAI	94hAPF_4	63	n	d	n	n/a	r			n/a
	2019-06-18	37CRNAI	94hAPF_4	64	n	d	n	n/a	r			n/a
	2019-06-18	37CRNAI	94hAPF_4	66	n	d	n	n/a	r			n/a
	2019-06-18	37CRNAI	94hAPF_4	68	n	d	n	n/a	r			n/a
	2019-06-18	37CRNAI	94hAPF_4	70	n	d	n	n/a	r			n/a
	2019-06-18	37CRNAI	94hAPF_4	72	n	d	n	n/a	r			y
	2019-06-18	37CRNAI	94hAPF_4	74	n	s	n	n/a	n/a	38	6.689	y
	2019-06-18	37CRNAI	94hAPF_4	75	n	s	n	n/a	n/a	20	89.132	n/a
	2019-06-18	37CRNAI	94hAPF_4	76	n	s	n	n/a	n/a	21	3.945	n/a
	2019-06-18	37CRNAI	94hAPF_4	77	n	s	a	unknown (end movie)	n/a	23	2.386	n/a
	2019-06-18	37CRNAI	94hAPF_4	79	n	s	a	unknown (end movie)	n/a			n/a
	2019-06-18	37CRNAI	94hAPF_4	82	n	d	n	n/a	r			n/a
	2019-06-18	37CRNAI	94hAPF_4	83	n	d	n	n/a	r			n/a
	2019-06-18	37CRNAI	94hAPF_4	84	n	d	n	n/a	r			n/a
	2019-06-18	37CRNAI	94hAPF_4	85	n	s	n	n/a	n/a	39	129.222	n/a

## Sheet: 94hAPF_8
	date	RNAi	movie name	comet number	in first frame	origin (soma, dendrite,axon)	approach axon/dendrite/no	enter axon/dendrite	polarity	angle of comet from axon	notes	Turning events
	2019-06-18	37CRNAI	94hAPF_8	1	y	a	n	n/a	a
	2019-06-18	37CRNAI	94hAPF_8	2	n	s	a	n	n/a	7.07		n/a
	2019-06-18	37CRNAI	94hAPF_8	3	y	s	n	n/a	n/a
	2019-06-18	37CRNAI	94hAPF_8	4	n	s	n	n/a	n/a	n/a		n/a
	2019-06-18	37CRNAI	94hAPF_8	5	n	s	a	y	n/a	2.594		n/a
	2019-06-18	37CRNAI	94hAPF_8	6	n	s	d	y	n/a	177.06		n/a
	2019-06-18	37CRNAI	94hAPF_8	7	n	d	na	n/a	r			n/a
	2019-06-18	37CRNAI	94hAPF_8	8	n	d	na	n/a	r			n
	2019-06-18	37CRNAI	94hAPF_8	9	n	s	n	n/a	n/a	171.444		n
	2019-06-18	37CRNAI	94hAPF_8	10	n	s	d	n	n/a	149.191		y
	2019-06-18	37CRNAI	94hAPF_8	11	n	s	n	n/a	n/a	88.914		n/a
	2019-06-18	37CRNAI	94hAPF_8	12	n	s	n	n/a	n/a	31.702		n/a
	2019-06-18	37CRNAI	94hAPF_8	13	n	s	d	n	n/a	147.643		n
	2019-06-18	37CRNAI	94hAPF_8	14	n	s	n	n/a	n/a	23.454		n/a
	2019-06-18	37CRNAI	94hAPF_8	16	n	s	n	n/a	n/a	n/a		n/a
	2019-06-18	37CRNAI	94hAPF_8	17	n	s	d	n	n/a	165.812		n
	2019-06-18	37CRNAI	94hAPF_8	18	n	s	n	n/a	n/a	104.036		y
	2019-06-18	37CRNAI	94hAPF_8	19	n	d	na	n/a	r			n/a
	2019-06-18	37CRNAI	94hAPF_8	21	n	s	n	n/a	n/a	0.165		y
	2019-06-18	37CRNAI	94hAPF_8	22	n	s	n	n/a	n/a	n/a		n/a
	2019-06-18	37CRNAI	94hAPF_8	23	n	s	n	n/a	n/a	36.752		n/a
	2019-06-18	37CRNAI	94hAPF_8	24	n	d	na	n/a	r			n
	2019-06-18	37CRNAI	94hAPF_8	25	n	d	na	n/a	r			n/a
	2019-06-18	37CRNAI	94hAPF_8	26	n	d	na	n/a	r			n/a
	2019-06-18	37CRNAI	94hAPF_8	27	n	d	na	n/a	r			n/a
	2019-06-18	37CRNAI	94hAPF_8	28	n	d	na	n/a	r			n/a
	2019-06-18	37CRNAI	94hAPF_8	29	n	d	na	n/a	r			n/a
	2019-06-18	37CRNAI	94hAPF_8	31	n	s	n	n/a	n/a	27.8		y
	2019-06-18	37CRNAI	94hAPF_8	32	n	s	a	y	n/a	17.305		n/a
	2019-06-18	37CRNAI	94hAPF_8	33	n	s	d	y	n/a	160.379	this looks like a minus end	n/a
	2019-06-18	37CRNAI	94hAPF_8	34	n	d	na	n/a	r			n/a
	2019-06-18	37CRNAI	94hAPF_8	35	n	d	na	n/a	r			n/a
	2019-06-18	37CRNAI	94hAPF_8	36	n	d	na	n/a	r			n
	2019-06-18	37CRNAI	94hAPF_8	37	n	d	na	n/a	r			n
	2019-06-18	37CRNAI	94hAPF_8	39	n	d	na	n/a	r			n/a
	2019-06-18	37CRNAI	94hAPF_8	41	n	s	a	y	n/a	14.97		n
	2019-06-18	37CRNAI	94hAPF_8	42	n	s	a	y	n/a	10.939		n/a
	2019-06-18	37CRNAI	94hAPF_8	43	n	s	n	n/a	n/a	35.079		n/a
	2019-06-18	37CRNAI	94hAPF_8	44	n	s	a	y	n/a	38.377		y
	2019-06-18	37CRNAI	94hAPF_8	45	n	s	n	n/a	n/a	172.669		n/a
	2019-06-18	37CRNAI	94hAPF_8	46	n	s	a	y	n/a	68.962	good example of turning microtubule	y
	2019-06-18	37CRNAI	94hAPF_8	47	n	s	n	n/a	n/a	167.905		n/a
	2019-06-18	37CRNAI	94hAPF_8	49	n	s	n	n/a	n/a	7.145		n/a
	2019-06-18	37CRNAI	94hAPF_8	51	n	s	n	n/a	n/a	172.938		n
	2019-06-18	37CRNAI	94hAPF_8	52	y	a	n	n/a	a
	2019-06-18	37CRNAI	94hAPF_8	53	n	s	n	n/a	n/a	104.49		n/a
	2019-06-18	37CRNAI	94hAPF_8	54	n	s	d	y	n/a	113.281		n
	2019-06-18	37CRNAI	94hAPF_8	55	n	s	d	n	n/a	163.225		n/a
	2019-06-18	37CRNAI	94hAPF_8	56	n	s	n	n/a	n/a	20.89		n
	2019-06-18	37CRNAI	94hAPF_8	57	n	d	na	n/a	r			y
	2019-06-18	37CRNAI	94hAPF_8	59	n	d	na	n/a	r			n/a
	2019-06-18	37CRNAI	94hAPF_8	60	n	d	na	n/a	r			y
	2019-06-18	37CRNAI	94hAPF_8	62	n	d	na	n/a	r			n/a
	2019-06-18	37CRNAI	94hAPF_8	64	n	d	na	n/a	r			n/a
	2019-06-18	37CRNAI	94hAPF_8	66	y	s	n	n/a	n/a
	2019-06-18	37CRNAI	94hAPF_8	67	n	s	n	n/a	n/a	2.49		y
	2019-06-18	37CRNAI	94hAPF_8	68	n	s	n	n/a	n/a	165.448		n
	2019-06-18	37CRNAI	94hAPF_8	69	n	s	n	n/a	n/a	91.227		n/a
	2019-06-18	37CRNAI	94hAPF_8	70	n	s	n	n/a	n/a	39.769		n/a

## Sheet: 3_3_19_L1N1
	date	RNAi	movie name	comet number	in first frame	origin (soma, dendrite,axon)	approach axon/dendrite/no	enter axon/dendrite	polarity	Turning events
	2019-03-03	37CRNAI	L1N1	1	y	s	n	na	na
	2019-03-03	37CRNAI	L1N1	2	n	s	d	n	na	n/a
	2019-03-03	37CRNAI	L1N1	3	n	s	n	na	na	n/a
	2019-03-03	37CRNAI	L1N1	4	n	s	n	na	na	n/a
	2019-03-03	37CRNAI	L1N1	5	n	s	d	n	na	n/a
	2019-03-03	37CRNAI	L1N1	6	n	s	n	na	na	n/a
	2019-03-03	37CRNAI	L1N1	7	n	s	n	na	na	n/a
	2019-03-03	37CRNAI	L1N1	8	n	s	n	na	na	n/a
	2019-03-03	37CRNAI	L1N1	9	n	s	n	na	na	y
	2019-03-03	37CRNAI	L1N1	10	n	s	n	na	na	n
	2019-03-03	37CRNAI	L1N1	11	n	s	n	na	na	n/a
	2019-03-03	37CRNAI	L1N1	12	n	s	d	n	na	n/a
	2019-03-03	37CRNAI	L1N1	13	n	s	n	na	na	y
	2019-03-03	37CRNAI	L1N1	14	n	s	d	y	na	n/a
	2019-03-03	37CRNAI	L1N1	15	n	s	n	na	na	n
	2019-03-03	37CRNAI	L1N1	16	n	s	d	y	na	n/a
	2019-03-03	37CRNAI	L1N1	17	n	s	n	na	na	n/a
	2019-03-03	37CRNAI	L1N1	18	n	s	n	na	na	n/a
	2019-03-03	37CRNAI	L1N1	19	n	s	n	na	na	n/a
	2019-03-03	37CRNAI	L1N1	20	n	s	n	na	na	n/a
	2019-03-03	37CRNAI	L1N1	21	n	s	n	na	na	n/a
	2019-03-03	37CRNAI	L1N1	22	n	s	d	y	na	n/a
	2019-03-03	37CRNAI	L1N1	23	n	s	n	na	na	y
	2019-03-03	37CRNAI	L1N1	24	n	s	n	na	na	n
	2019-03-03	37CRNAI	L1N1	25	n	s	n	na	na	n/a
	2019-03-03	37CRNAI	L1N1	26	n	s	n	na	na	n
	2019-03-03	37CRNAI	L1N1	27	n	s	d	y	na	n/a
	2019-03-03	37CRNAI	L1N1	28	n	s	a	y	na	n/a
	2019-03-03	37CRNAI	L1N1	29	n	s	n	na	na
	2019-03-03	37CRNAI	L1N1	30	n	s	n	na	na	y
	2019-03-03	37CRNAI	L1N1	31	n	s	n	na	na	n/a
	2019-03-03	37CRNAI	L1N1	32	n	s	n	na	na
	2019-03-03	37CRNAI	L1N1	33	n	d	na	na	r	n/a
	2019-03-03	37CRNAI	L1N1	34	n	d	na	na	r	n
	2019-03-03	37CRNAI	L1N1	35	n	d	na	na	r	y
	2019-03-03	37CRNAI	L1N1	36	n	d	na	na	r	n
	2019-03-03	37CRNAI	L1N1	37	n	d	na	na	r	y
	2019-03-03	37CRNAI	L1N1	38	n	d	na	na	r	n/a
	2019-03-03	37CRNAI	L1N1	39	n	d	na	na	r	y
	2019-03-03	37CRNAI	L1N1	40	n	s	n	na	na
	2019-03-03	37CRNAI	L1N1	41	n	s	n	na	na	y
	2019-03-03	37CRNAI	L1N1	42	n	d	na	na	r	n/a
	2019-03-03	37CRNAI	L1N1	43	n	s	n	na	na	n/a
	2019-03-03	37CRNAI	L1N1	44	n	s	n	na	na
	2019-03-03	37CRNAI	L1N1	45	n	s	n	na	na
	2019-03-03	37CRNAI	L1N1	46	n	d	na	na	r	y
	2019-03-03	37CRNAI	L1N1	47	n	s	n	na	na	y
	2019-03-03	37CRNAI	L1N1	48	n	s	n	na	na	y
	2019-03-03	37CRNAI	L1N1	49	n	s	n	na	na	y
	2019-03-03	37CRNAI	L1N1	50	n	s	n	na	na	n/a
	2019-03-03	37CRNAI	L1N1	51	n	d	na	na	r	n/a
	2019-03-03	37CRNAI	L1N1	52	n	s	n	na	na	n/a
	2019-03-03	37CRNAI	L1N1	53	n	s	a	y	na
	2019-03-03	37CRNAI	L1N1	54	n	s	n	na	na	y
	2019-03-03	37CRNAI	L1N1	55	n	s	n	na	na	y
	2019-03-03	37CRNAI	L1N1	56	n	s	n	na	na
	2019-03-03	37CRNAI	L1N1	57	n	s	n	na	na	y
	2019-03-03	37CRNAI	L1N1	58	n	s	n	na	na	y
	2019-03-03	37CRNAI	L1N1	59	n	s	n	na	na	n
	2019-03-03	37CRNAI	L1N1	60	n	s	n	na	na	n/a
	2019-03-03	37CRNAI	L1N1	61	n	s	n	na	na	n
	2019-03-03	37CRNAI	L1N1	62	n	s	n	na	na	n/a
	2019-03-03	37CRNAI	L1N1	63	n	s	n	na	na	n/a
	2019-03-03	37CRNAI	L1N1	64	n	s	n	na	na	n/a
	2019-03-03	37CRNAI	L1N1	65	n	s	n	na	na	n/a
	2019-03-03	37CRNAI	L1N1	66	n	s	n	na	na
	2019-03-03	37CRNAI	L1N1	67	n	s	n	na	na	n/a
	2019-03-03	37CRNAI	L1N1	68	n	s	a	y	na
	2019-03-03	37CRNAI	L1N1	69	n	a	na	na	a
	2019-03-03	37CRNAI	L1N1	70	n	s	n	na	na	n/a
	2019-03-03	37CRNAI	L1N1	71	n	s	a	y	na
	2019-03-03	37CRNAI	L1N1	72	n	a	na	na	a
	2019-03-03	37CRNAI	L1N1	73	n	s	n	na	na	n/a
	2019-03-03	37CRNAI	L1N1	74	n	a	na	na	a
	2019-03-03	37CRNAI	L1N1	75	n	s	n	na	na	n/a
	2019-03-03	37CRNAI	L1N1	76	n	s	n	na	na	n
	2019-03-03	37CRNAI	L1N1	77	n	s	n	na	na	n/a
	2019-03-03	37CRNAI	L1N1	78	n	s	a	n	na
	2019-03-03	37CRNAI	L1N1	79	n	s	n	na	na	y
	2019-03-03	37CRNAI	L1N1	80	n	s	n	na	na	n/a
	2019-03-03	37CRNAI	L1N1	81	n	s	n	na	na	n/a
	2019-03-03	37CRNAI	L1N1	82	n	s	n	na	na	n/a
	2019-03-03	37CRNAI	L1N1	83	n	s	n	na	na	n
	2019-03-03	37CRNAI	L1N1	84	n	s	n	na	na	n/a
	2019-03-03	37CRNAI	L1N1	85	n	s	n	na	na	y
	2019-03-03	37CRNAI	L1N1	86	n	s	n	na	na	n/a
	2019-03-03	37CRNAI	L1N1	87	n	s	n	na	na	y
	2019-03-03	37CRNAI	L1N1	88	n	s	a	n	na	n/a
	2019-03-03	37CRNAI	L1N1	89	n	s	a	n	na
	2019-03-03	37CRNAI	L1N1	90	n	s	n	na	na	n/a
	2019-03-03	37CRNAI	L1N1	91	n	s	n	na	na	n/a
	2019-03-03	37CRNAI	L1N1	92	n	s	n	na	na	n
	2019-03-03	37CRNAI	L1N1	93	n	s	a	y	na	n
	2019-03-03	37CRNAI	L1N1	94	n	s	n	na	na	y
	2019-03-03	37CRNAI	L1N1	95	n	s	n	na	na	y
	2019-03-03	37CRNAI	L1N1	96	n	s	n	na	na	n/a
	2019-03-03	37CRNAI	L1N1	97	n	s	n	na	na	n/a
	2019-03-03	37CRNAI	L1N1	98	n	s	n	na	na	n/a
	2019-03-03	37CRNAI	L1N1	99	n	s	a	y	na	n/a
	2019-03-03	37CRNAI	L1N1	100	n	s	a	n	na	n/a
	2019-03-03	37CRNAI	L1N1	101	n	s	a	y	na	n
	2019-03-03	37CRNAI	L1N1	102	n	s	n	na	na	n
	2019-03-03	37CRNAI	L1N1	103	n	s	a	y	na	n/a
	2019-03-03	37CRNAI	L1N1	104	n	s	a	n	na	n/a
	2019-03-03	37CRNAI	L1N1	105	n	s	n	na	na	n/a
	2019-03-03	37CRNAI	L1N1	106	n	s	a	n	na	n/a
	2019-03-03	37CRNAI	L1N1	107	n	s	a	y	na	n/a
	2019-03-03	37CRNAI	L1N1	108	n	s	n	na	na	n/a
	2019-03-03	37CRNAI	L1N1	109	n	s	n	na	na	n/a
	2019-03-03	37CRNAI	L1N1	110	n	s	n	na	na	y
	2019-03-03	37CRNAI	L1N1	111	n	s	n	na	na	n/a
	2019-03-03	37CRNAI	L1N1	112	n	s	a	y	na	n/a
	2019-03-03	37CRNAI	L1N1	113	n	s	n	na	na	n/a
	2019-03-03	37CRNAI	L1N1	114	n	s	n	na	na	n/a
	2019-03-03	37CRNAI	L1N1	115	n	s	a	n	na	n
	2019-03-03	37CRNAI	L1N1	116	n	s	n	na	na	n/a
	2019-03-03	37CRNAI	L1N1	117	n	s	n	na	na	n/a
	2019-03-03	37CRNAI	L1N1	118	n	s	n	na	na	n/a
	2019-03-03	37CRNAI	L1N1	119	n	s	a	y	na	n
	2019-03-03	37CRNAI	L1N1	120	n	s	n	na	na
	2019-03-03	37CRNAI	L1N1	121	n	s	a	n	na	n
	2019-03-03	37CRNAI	L1N1	122	n	s	n	na	na	n
	2019-03-03	37CRNAI	L1N1	123	n	s	n	na	na	n/a
	2019-03-03	37CRNAI	L1N1	124	n	s	n	na	na	n/a
	2019-03-03	37CRNAI	L1N1	125	n	s	n	na	na	y
	2019-03-03	37CRNAI	L1N1	126	n	s	n	na	na	n
	2019-03-03	37CRNAI	L1N1	127	n	s	n	na	na	y
	2019-03-03	37CRNAI	L1N1	128	n	s	n	na	na	n/a
	2019-03-03	37CRNAI	L1N1	129	n	s	n	na	na	y
	2019-03-03	37CRNAI	L1N1	130	n	s	n	na	na	n
	2019-03-03	37CRNAI	L1N1	131	n	s	n	na	na	n/a
	2019-03-03	37CRNAI	L1N1	132	n	s	n	na	na	y
	2019-03-03	37CRNAI	L1N1	133	n	s	n	na	na	y
	2019-03-03	37CRNAI	L1N1	134	n	s	n	na	na	n/a
	2019-03-03	37CRNAI	L1N1	135	n	s	n	na	na	n/a
	2019-03-03	37CRNAI	L1N1	136	n	s	a	n	na	n/a
	2019-03-03	37CRNAI	L1N1	137	n	s	a	n	na	n
	2019-03-03	37CRNAI	L1N1	138	n	s	n	na	na	n/a
	2019-03-03	37CRNAI	L1N1	139	n	s	n	na	na	n/a
	2019-03-03	37CRNAI	L1N1	140	n	s	n	na	na	n/a
	2019-03-03	37CRNAI	L1N1	141	n	s	n	na	na	n/a
	2019-03-03	37CRNAI	L1N1	142	n	s	n	na	na	n/a
	2019-03-03	37CRNAI	L1N1	143	n	s	n	na	na	y
	2019-03-03	37CRNAI	L1N1	144	n	s	n	na	na	n/a
	2019-03-03	37CRNAI	L1N1	145	n	s	n	na	na	n
	2019-03-03	37CRNAI	L1N1	146	n	s	n	na	na	y
	2019-03-03	37CRNAI	L1N1	147	n	s	n	na	na	y
	2019-03-03	37CRNAI	L1N1	148	n	s	n	na	na	n/a
	2019-03-03	37CRNAI	L1N1	149	n	a	na	na	a	n/a
	2019-03-03	37CRNAI	L1N1	150	n	s	n	na	na	n/a
	2019-03-03	37CRNAI	L1N1	151	n	s	n	na	na	n/a
	2019-03-03	37CRNAI	L1N1	152	n	s	n	na	na	n/a
	2019-03-03	37CRNAI	L1N1	153	n	s	a	y	na	n/a
	2019-03-03	37CRNAI	L1N1	154	n	s	n	na	na	n/a
	2019-03-03	37CRNAI	L1N1	155	n	s	n	na	na	y
	2019-03-03	37CRNAI	L1N1	156	n	s	n	na	na	n/a
	2019-03-03	37CRNAI	L1N1	157	n	s	a	y	na	n/a
	2019-03-03	37CRNAI	L1N1	158	n	s	n	na	na	n/a
	2019-03-03	37CRNAI	L1N1	159	n	s	n	na	na	n/a
	2019-03-03	37CRNAI	L1N1	160	n	s	a	n	na	n
	2019-03-03	37CRNAI	L1N1	161	n	s	a	y	na	n/a
	2019-03-03	37CRNAI	L1N1	162	n	s	n	na	na	n/a
	2019-03-03	37CRNAI	L1N1	163	n	s	n	na	na	n/a
	2019-03-03	37CRNAI	L1N1	164	n	s	n	na	na	n/a
	2019-03-03	37CRNAI	L1N1	165	n	s	a	n	na	n/a
	2019-03-03	37CRNAI	L1N1	166	n	s	n	na	na	n/a
	2019-03-03	37CRNAI	L1N1	167	n	s	a	n	na	y
	2019-03-03	37CRNAI	L1N1	168	n	s	n	na	na	y
	2019-03-03	37CRNAI	L1N1	169	n	s	n	na	na	y
	2019-03-03	37CRNAI	L1N1	170	n	a	na	na	a	n/a
	2019-03-03	37CRNAI	L1N1	171	n	s	n	na	na	n/a
	2019-03-03	37CRNAI	L1N1	172	n	s	n	na	na	n/a
	2019-03-03	37CRNAI	L1N1	173	n	s	a	n	na	n/a
	2019-03-03	37CRNAI	L1N1	174	n	s	a	n	na	n/a
	2019-03-03	37CRNAI	L1N1	175	n	s	n	na	na	y
	2019-03-03	37CRNAI	L1N1	176	n	s	n	na	na	n/a
	2019-03-03	37CRNAI	L1N1	177	n	s	n	na	na	n
	2019-03-03	37CRNAI	L1N1	178	n	s	a	y	na	n/a
	2019-03-03	37CRNAI	L1N1	179	n	s	a	n	na	n/a
	2019-03-03	37CRNAI	L1N1	180	n	s	n	na	na	n/a
	2019-03-03	37CRNAI	L1N1	181	n	s	a	n	na	n/a
	2019-03-03	37CRNAI	L1N1	182	n	s	n	na	na	n
	2019-03-03	37CRNAI	L1N1	183	n	s	n	na	na	n/a
	2019-03-03	37CRNAI	L1N1	184	n	s	n	na	na	n/a
	2019-03-03	37CRNAI	L1N1	185	n	s	a	n	na	n/a
	2019-03-03	37CRNAI	L1N1	186	n	s	n	na	na	n/a
	2019-03-03	37CRNAI	L1N1	187	n	s	n	na	na	n
	2019-03-03	37CRNAI	L1N1	188	n	s	n	na	na	n/a
	2019-03-03	37CRNAI	L1N1	189	n	s	n	na	na	n/a
	2019-03-03	37CRNAI	L1N1	190	n	s	n	na	na	n/a
	2019-03-03	37CRNAI	L1N1	191	n	s	n	na	na	y
	2019-03-03	37CRNAI	L1N1	192	n	s	n	na	na	n/a
	2019-03-03	37CRNAI	L1N1	193	n	s	n	na	na	n/a
	2019-03-03	37CRNAI	L1N1	194	n	s	n	na	na	n
	2019-03-03	37CRNAI	L1N1	195	n	s	a	y	na	y
	2019-03-03	37CRNAI	L1N1	196	n	s	a	y	na	n/a
	2019-03-03	37CRNAI	L1N1	197	n	s	a	n	na	y
	2019-03-03	37CRNAI	L1N1	198	n	s	a	n	na	n/a
	2019-03-03	37CRNAI	L1N1	199	n	s	n	na	na	n/a
	2019-03-03	37CRNAI	L1N1	200	n	s	n	na	na	n
	2019-03-03	37CRNAI	L1N1	201	n	s	n	na	na	y

[truncated: 5 more sheets: 29_8_19_L3N1, 29_8_19_L4N1, 29_8_19_L6N1, summary, x]
