# Supplementary material for: Microtubules originate asymmetrically at the somatic golgi and are guided via Kinesin2 to maintain polarity within neurons
Source: eLife. 2020 Jul 13;9:e58943. doi: 10.7554/eLife.58943 (PMC7394546; doi:10.7554/eLife.58943)
Supplement: Figure 7—source data 2. [file elife-58943-fig7-data2.xlsx]

## Sheet: L2N1_9 11 19
	date	RNAi	movie name	comet number	in first frame	origin (soma, dendrite,axon)	approach axon/dendrite/no	enter axon/dendrite	polarity	angle of comet from axon	Turning events?
	2019-11-09	KapRNAI	L2N1	1	n
	2019-11-09	KapRNAI	L2N1	2	n						n
	2019-11-09	KapRNAI	L2N1	3	y	d	na	na	a	na
	2019-11-09	KapRNAI	L2N1	4	y	d	na	na	a	na
	2019-11-09	KapRNAI	L2N1	5	y	d	na	na	a	na
	2019-11-09	KapRNAI	L2N1	6	n	d	na	na	a	na	n
	2019-11-09	KapRNAI	L2N1	7	n	d	na	na	r	na	n/a
	2019-11-09	KapRNAI	L2N1	8	y	s	d	y	na			number	20	15	5
	2019-11-09	KapRNAI	L2N1	9	n	d	na	na	a	na	n/a
	2019-11-09	KapRNAI	L2N1	10	y	d	na	na	r	na
	2019-11-09	KapRNAI	L2N1	11	n	s	d	y	na		n
	2019-11-09	KapRNAI	L2N1	12	n	d	na	na	a	na	n/a
	2019-11-09	KapRNAI	L2N1	13	n	d	na	na	a	na	n/a
	2019-11-09	KapRNAI	L2N1	14	n	d	na	na	a	na	n/a
	2019-11-09	KapRNAI	L2N1	15	n	d	na	na	r	na	n/a
	2019-11-09	KapRNAI	L2N1	16	n	d	na	na	a	na	n/a
	2019-11-09	KapRNAI	L2N1	17	n						n/a
	2019-11-09	KapRNAI	L2N1	18	n	d	na	na	a	na	n/a
	2019-11-09	KapRNAI	L2N1	19	n	d	na	na	a	na	n/a
	2019-11-09	KapRNAI	L2N1	20	n						n/a
	2019-11-09	KapRNAI	L2N1	21	n	d	na	na	a	na	n/a
	2019-11-09	KapRNAI	L2N1	22	n	d	na	na	a	na	n/a
	2019-11-09	KapRNAI	L2N1	23	n	s	d	y	na		n/a
	2019-11-09	KapRNAI	L2N1	24	n	s	d	n	na		y
	2019-11-09	KapRNAI	L2N1	25	n						n/a
	2019-11-09	KapRNAI	L2N1	26	n						y
	2019-11-09	KapRNAI	L2N1	27	n	s	d	y	na		n
	2019-11-09	KapRNAI	L2N1	28	n						n
	2019-11-09	KapRNAI	L2N1	29	n						n
	2019-11-09	KapRNAI	L2N1	30	n						n
	2019-11-09	KapRNAI	L2N1	31	n	s	d	y	na		n
	2019-11-09	KapRNAI	L2N1	32	n	d	na	na	r	na	n/a
	2019-11-09	KapRNAI	L2N1	33	y
	2019-11-09	KapRNAI	L2N1	34	n						n
	2019-11-09	KapRNAI	L2N1	35	n						n
	2019-11-09	KapRNAI	L2N1	36	n						n/a
	2019-11-09	KapRNAI	L2N1	37	y
	2019-11-09	KapRNAI	L2N1	38	y
	2019-11-09	KapRNAI	L2N1	39	n						n/a
	2019-11-09	KapRNAI	L2N1	40	n						n/a
	2019-11-09	KapRNAI	L2N1	41	n						n/a
	2019-11-09	KapRNAI	L2N1	42	n	s	d	n	na		n
	2019-11-09	KapRNAI	L2N1	43	n						n
	2019-11-09	KapRNAI	L2N1	44	y
	2019-11-09	KapRNAI	L2N1	45	n						y
	2019-11-09	KapRNAI	L2N1	46	n						n/a
	2019-11-09	KapRNAI	L2N1	47	n						n/a
	2019-11-09	KapRNAI	L2N1	48	y
	2019-11-09	KapRNAI	L2N1	49	n						n
	2019-11-09	KapRNAI	L2N1	50	n	s	d	n	na		n
	2019-11-09	KapRNAI	L2N1	51	n						n/a
	2019-11-09	KapRNAI	L2N1	52	y
	2019-11-09	KapRNAI	L2N1	53	n						n/a
	2019-11-09	KapRNAI	L2N1	54	n						y
	2019-11-09	KapRNAI	L2N1	55	y	a	na	na	r	na
	2019-11-09	KapRNAI	L2N1	56	y	s	a	y	na
	2019-11-09	KapRNAI	L2N1	57	y	a	na	na	a	na
	2019-11-09	KapRNAI	L2N1	58	y	s	a	n	na
	2019-11-09	KapRNAI	L2N1	59	y	a	na	na	a	na
	2019-11-09	KapRNAI	L2N1	60	y
	2019-11-09	KapRNAI	L2N1	61	n	s	a	y	na		n
	2019-11-09	KapRNAI	L2N1	62	n	s	d	y	na		n
	2019-11-09	KapRNAI	L2N1	63	n	d	na	na	a	na	n/a
	2019-11-09	KapRNAI	L2N1	64	n	d	na	na	r	na	n/a
	2019-11-09	KapRNAI	L2N1	65	n	s	d	y	na		n/a
	2019-11-09	KapRNAI	L2N1	66	y
	2019-11-09	KapRNAI	L2N1	67	n						n
	2019-11-09	KapRNAI	L2N1	68	n						n/a
	2019-11-09	KapRNAI	L2N1	69	n						n/a
	2019-11-09	KapRNAI	L2N1	70	n						n
	2019-11-09	KapRNAI	L2N1	71	n						y
	2019-11-09	KapRNAI	L2N1	72	y	d	na	na	a	na
	2019-11-09	KapRNAI	L2N1	73	y
	2019-11-09	KapRNAI	L2N1	74	n						n
	2019-11-09	KapRNAI	L2N1	75	n						n/a
	2019-11-09	KapRNAI	L2N1	76	y
	2019-11-09	KapRNAI	L2N1	77	n	s	a	y	na		n/a
	2019-11-09	KapRNAI	L2N1	78	n	a	na	na	r	na	n/a
	2019-11-09	KapRNAI	L2N1	79	n						n
	2019-11-09	KapRNAI	L2N1	80	n	s	d	y	na		n/a
	2019-11-09	KapRNAI	L2N1	81	n	s	d	n	na		n
	2019-11-09	KapRNAI	L2N1	82	n	s	d	y	na		n
	2019-11-09	KapRNAI	L2N1	83	n	d	na	na	r	na	n
	2019-11-09	KapRNAI	L2N1	84	n	s	d	n	na		y
	2019-11-09	KapRNAI	L2N1	85	n	d	na	na	a	na	n/a
	2019-11-09	KapRNAI	L2N1	86	n	s	d	y	na		n
	2019-11-09	KapRNAI	L2N1	87	n						n/a
	2019-11-09	KapRNAI	L2N1	88	n						n/a
	2019-11-09	KapRNAI	L2N1	89	n						n/a
	2019-11-09	KapRNAI	L2N1	90	y	s	a	y	na
	2019-11-09	KapRNAI	L2N1	91	n						n/a
	2019-11-09	KapRNAI	L2N1	92	n	a	na	na	a	na	n/a
	2019-11-09	KapRNAI	L2N1	93	y	d	na	na	a	na
	2019-11-09	KapRNAI	L2N1	94	y	d	na	na	a	na
	2019-11-09	KapRNAI	L2N1	95	n	d	na	na	r	na	n/a
	2019-11-09	KapRNAI	L2N1	96	n						n
	2019-11-09	KapRNAI	L2N1	97	n	s	a	y	na		n/a
	2019-11-09	KapRNAI	L2N1	98	y
	2019-11-09	KapRNAI	L2N1	99	n						n
	2019-11-09	KapRNAI	L2N1	100	n						n/a
	2019-11-09	KapRNAI	L2N1	101	n						y
	2019-11-09	KapRNAI	L2N1	102	n	s	a	y	na		n/a
	2019-11-09	KapRNAI	L2N1	103	n						n/a
	2019-11-09	KapRNAI	L2N1	104	n						n
	2019-11-09	KapRNAI	L2N1	105	n	s	a	n	na		n
	2019-11-09	KapRNAI	L2N1	106	n	s	a	n	na		n
	2019-11-09	KapRNAI	L2N1	107	n						y
	2019-11-09	KapRNAI	L2N1	108	n						n/a
	2019-11-09	KapRNAI	L2N1	109	n						n/a
	2019-11-09	KapRNAI	L2N1	110	n						n
	2019-11-09	KapRNAI	L2N1	111	n						n/a
	2019-11-09	KapRNAI	L2N1	112	n						n/a
	2019-11-09	KapRNAI	L2N1	113	n						n/a
	2019-11-09	KapRNAI	L2N1	114	n						n
	2019-11-09	KapRNAI	L2N1	115	n	s	d	y	na		n
	2019-11-09	KapRNAI	L2N1	116	n	s	d	y	na		n
	2019-11-09	KapRNAI	L2N1	117	n	d	na	na	r	na	n
	2019-11-09	KapRNAI	L2N1	118	n	d	na	na	r	na	n/a
	2019-11-09	KapRNAI	L2N1	119	n	s	d	y	na		n
	2019-11-09	KapRNAI	L2N1	120	n						n/a
	2019-11-09	KapRNAI	L2N1	121	n						n/a
	2019-11-09	KapRNAI	L2N1	122	n						n
	2019-11-09	KapRNAI	L2N1	123	n						n
	2019-11-09	KapRNAI	L2N1	124	n						n/a
	2019-11-09	KapRNAI	L2N1	125	n						n/a
	2019-11-09	KapRNAI	L2N1	126	n						n
	2019-11-09	KapRNAI	L2N1	127	n						n
	2019-11-09	KapRNAI	L2N1	128	n
	2019-11-09	KapRNAI	L2N1	129	n						n/a
	2019-11-09	KapRNAI	L2N1	130	n						y
	2019-11-09	KapRNAI	L2N1	131	n						n/a
	2019-11-09	KapRNAI	L2N1	132	n	s	a	y	na		n
	2019-11-09	KapRNAI	L2N1	133	n						n
	2019-11-09	KapRNAI	L2N1	134	n						n
	2019-11-09	KapRNAI	L2N1	135	n						n/a
	2019-11-09	KapRNAI	L2N1	136	n						n/a
	2019-11-09	KapRNAI	L2N1	137	n						n/a
	2019-11-09	KapRNAI	L2N1	138	n						n/a
	2019-11-09	KapRNAI	L2N1	139	n						n
	2019-11-09	KapRNAI	L2N1	140	n	s	a	n	na		n/a
	2019-11-09	KapRNAI	L2N1	141	n						n
	2019-11-09	KapRNAI	L2N1	142	n						n
	2019-11-09	KapRNAI	L2N1	143	n						n/a
	2019-11-09	KapRNAI	L2N1	144	n						n/a
	2019-11-09	KapRNAI	L2N1	145	n	s	a	y	na		n/a
	2019-11-09	KapRNAI	L2N1	146	n						n/a
	2019-11-09	KapRNAI	L2N1	147	n						n/a
	2019-11-09	KapRNAI	L2N1	148	n	s	d	y	na		n
	2019-11-09	KapRNAI	L2N1	149	n	d	na	na	a	na	n/a
	2019-11-09	KapRNAI	L2N1	150	n	d	na	na	r	na	n/a
	2019-11-09	KapRNAI	L2N1	151	n						n/a
	2019-11-09	KapRNAI	L2N1	152	n	d	na	na	a	na	n/a
	2019-11-09	KapRNAI	L2N1	153	n	s	d	y	na		n
	2019-11-09	KapRNAI	L2N1	154	n
	2019-11-09	KapRNAI	L2N1	155	n	d	na	na	r	na	n/a
	2019-11-09	KapRNAI	L2N1	156	n
	2019-11-09	KapRNAI	L2N1	157	n	d	na	na	r	na	n
	2019-11-09	KapRNAI	L2N1	158	n	d	na	na	a	na	n/a
	2019-11-09	KapRNAI	L2N1	159	n
	2019-11-09	KapRNAI	L2N1	160	n	s	n	na	na		n
	2019-11-09	KapRNAI	L2N1	161	n						n/a
	2019-11-09	KapRNAI	L2N1	162	n						y
	2019-11-09	KapRNAI	L2N1	163	n						n
	2019-11-09	KapRNAI	L2N1	164	n						n/a
	2019-11-09	KapRNAI	L2N1	165	n						n/a
	2019-11-09	KapRNAI	L2N1	166	n						n
	2019-11-09	KapRNAI	L2N1	167	n
	2019-11-09	KapRNAI	L2N1	168	n						n
	2019-11-09	KapRNAI	L2N1	169	n
	2019-11-09	KapRNAI	L2N1	170	n	s	a	y	na		y
	2019-11-09	KapRNAI	L2N1	171	n
	2019-11-09	KapRNAI	L2N1	172	n						n/a
	2019-11-09	KapRNAI	L2N1	173	n						n/a
	2019-11-09	KapRNAI	L2N1	174	n						n/a
	2019-11-09	KapRNAI	L2N1	175	n						n/a
	2019-11-09	KapRNAI	L2N1	176	n						n/a
	2019-11-09	KapRNAI	L2N1	177	n						n/a
	2019-11-09	KapRNAI	L2N1	178	n						n/a
	2019-11-09	KapRNAI	L2N1	179	n
	2019-11-09	KapRNAI	L2N1	180	n						n/a
	2019-11-09	KapRNAI	L2N1	181	n
	2019-11-09	KapRNAI	L2N1	182	n						y
	2019-11-09	KapRNAI	L2N1	183	y	a	na	na	a	na
	2019-11-09	KapRNAI	L2N1	184	y	a	na	na	a	na
	2019-11-09	KapRNAI	L2N1	185	y	s	a	n	na
	2019-11-09	KapRNAI	L2N1	186	n	a	na	na	r	na	n/a
	2019-11-09	KapRNAI	L2N1	187	n	a	na	na	a	na	n/a
	2019-11-09	KapRNAI	L2N1	188	n	a	na	na	a	na	n/a
	2019-11-09	KapRNAI	L2N1	189	n	a	na	na	a	na	n/a
	2019-11-09	KapRNAI	L2N1	190	n	s	a	y	na		n/a
	2019-11-09	KapRNAI	L2N1	191	n	s	a	y	na		n
	2019-11-09	KapRNAI	L2N1	192	n						n/a
	2019-11-09	KapRNAI	L2N1	193	n						n/a
	2019-11-09	KapRNAI	L2N1	194	n						n/a
	2019-11-09	KapRNAI	L2N1	195	n						y
	2019-11-09	KapRNAI	L2N1	196	n						n/a
	2019-11-09	KapRNAI	L2N1	197	n						n/a
	2019-11-09	KapRNAI	L2N1	198	n						n/a
	2019-11-09	KapRNAI	L2N1	199	n						n
	2019-11-09	KapRNAI	L2N1	200	n						n/a
	2019-11-09	KapRNAI	L2N1	201	n						n
	2019-11-09	KapRNAI	L2N1	202	n	s	a	y	na		n/a
	2019-11-09	KapRNAI	L2N1	203	n	s	a	y	na		n/a
	2019-11-09	KapRNAI	L2N1	204	n	s	a	n	na		n
	2019-11-09	KapRNAI	L2N1	205	n	s	a	y	na		n
	2019-11-09	KapRNAI	L2N1	206	n						n
	2019-11-09	KapRNAI	L2N1	207	n	s	a	y	na		n
	2019-11-09	KapRNAI	L2N1	208	n						n/a
	2019-11-09	KapRNAI	L2N1	209	n	s	a	y	na		n
	2019-11-09	KapRNAI	L2N1	210	n	s	a	y	na		n
	2019-11-09	KapRNAI	L2N1	211	n						n
	2019-11-09	KapRNAI	L2N1	212	n						n/a
	2019-11-09	KapRNAI	L2N1	213	n						n/a
	2019-11-09	KapRNAI	L2N1	214	n						n
	2019-11-09	KapRNAI	L2N1	215	n						n
	2019-11-09	KapRNAI	L2N1	216	n						n/a
	2019-11-09	KapRNAI	L2N1	217	n	s	a	y	na		n/a
	2019-11-09	KapRNAI	L2N1	218	n						n/a
	2019-11-09	KapRNAI	L2N1	219	n						n
	2019-11-09	KapRNAI	L2N1	220	n						n/a
	2019-11-09	KapRNAI	L2N1	221	n	s	a	y	na		n
	2019-11-09	KapRNAI	L2N1	222	n	s	a	y	na		n
	2019-11-09	KapRNAI	L2N1	223	n						y
	2019-11-09	KapRNAI	L2N1	224	n						n
	2019-11-09	KapRNAI	L2N1	225	n						n
	2019-11-09	KapRNAI	L2N1	226	n	s	a	y	na		n
	2019-11-09	KapRNAI	L2N1	227	n						y
	2019-11-09	KapRNAI	L2N1	228	n	s	a	y	na		n/a
	2019-11-09	KapRNAI	L2N1	229	n
	2019-11-09	KapRNAI	L2N1	230	n						n/a
	2019-11-09	KapRNAI	L2N1	231	n						n/a
	2019-11-09	KapRNAI	L2N1	232	n	s	a	na	na		n/a
	2019-11-09	KapRNAI	L2N1	233	n
	2019-11-09	KapRNAI	L2N1	234	n						n/a
	2019-11-09	KapRNAI	L2N1	235	n	s	a	y	na		n/a
	2019-11-09	KapRNAI	L2N1	236	n						n/a
	2019-11-09	KapRNAI	L2N1	237	n						n/a
	2019-11-09	KapRNAI	L2N1	238	n	s	a	y	na		n
	2019-11-09	KapRNAI	L2N1	239	n	s	a	y	na		n
	2019-11-09	KapRNAI	L2N1	240	n
	2019-11-09	KapRNAI	L2N1	241	n						n/a
	2019-11-09	KapRNAI	L2N1	242	n						n/a
	2019-11-09	KapRNAI	L2N1	243	n
	2019-11-09	KapRNAI	L2N1	244	n						n/a
	2019-11-09	KapRNAI	L2N1	245	n						n/a
	2019-11-09	KapRNAI	L2N1	246	n						n/a
	2019-11-09	KapRNAI	L2N1	247	n						n/a
	2019-11-09	KapRNAI	L2N1	248	n						n/a
	2019-11-09	KapRNAI	L2N1	249	n						n/a
	2019-11-09	KapRNAI	L2N1	250	n						n/a
	2019-11-09	KapRNAI	L2N1	251	n	d	na	na	a	na	n/a

## Sheet: L1N1_7 11 19
	date	RNAi	movie name	comet number	in first frame	origin (soma, dendrite,axon)	approach axon/dendrite/no	enter axon/dendrite	polarity	angle of comet from axon	Turning events
	2019-11-07	KapRNAI	L1N1	1	y	d	na	na	a
	2019-11-07	KapRNAI	L1N1	2	y	d	na	na	a
	2019-11-07	KapRNAI	L1N1	3	y	d	na	na	r
	2019-11-07	KapRNAI	L1N1	4	y	s	n	na	na				dendrites
	2019-11-07	KapRNAI	L1N1	5	y	s	d	n	na				approach	enter	excluded
	2019-11-07	KapRNAI	L1N1	6	y	s	n	na	na			number
	2019-11-07	KapRNAI	L1N1	7	y	s	n	na	na			%	#DIV/0!	#DIV/0!
	2019-11-07	KapRNAI	L1N1	8	y	s	n	na	na
	2019-11-07	KapRNAI	L1N1	9	n	s	n	na	na		n/a
	2019-11-07	KapRNAI	L1N1	10	n	s	d	y	na		n/a
	2019-11-07	KapRNAI	L1N1	11	n	s	d	y	na		n/a
	2019-11-07	KapRNAI	L1N1	12	n	s	n	na	na		n/a
	2019-11-07	KapRNAI	L1N1	13	n	d	na	na	r		n/a
	2019-11-07	KapRNAI	L1N1	14	n	d	na	na	r		n/a
	2019-11-07	KapRNAI	L1N1	15	n	d	na	na	a		n
	2019-11-07	KapRNAI	L1N1	16	n	s	d	y	na		n/a
	2019-11-07	KapRNAI	L1N1	17	n	s	n	na	na		y
	2019-11-07	KapRNAI	L1N1	18	n	s	d	y	na		n/a
	2019-11-07	KapRNAI	L1N1	19	n	s	d	n	na		n/a
	2019-11-07	KapRNAI	L1N1	20	n	s	n	na	na		n/a
	2019-11-07	KapRNAI	L1N1	21	n	s	n	na	na		n/a
	2019-11-07	KapRNAI	L1N1	22	n	s	d	y	na		n/a
	2019-11-07	KapRNAI	L1N1	23	n	d	na	na	r		n/a
	2019-11-07	KapRNAI	L1N1	24	n	s	n	na	na		n/a
	2019-11-07	KapRNAI	L1N1	25	n	s	n	na	na		n/a
	2019-11-07	KapRNAI	L1N1	26	n	s	n	na	na		n/a
	2019-11-07	KapRNAI	L1N1	27	n	s	n	na	na		n/a
	2019-11-07	KapRNAI	L1N1	28	n	s	n	na	na		n
	2019-11-07	KapRNAI	L1N1	29	n	s	n	na	na		n
	2019-11-07	KapRNAI	L1N1	30	n	s	n	na	na		n/a
	2019-11-07	KapRNAI	L1N1	31	n	s	n	na	na		n/a
	2019-11-07	KapRNAI	L1N1	32	n	a	na	na	a		n/a
	2019-11-07	KapRNAI	L1N1	33	n	s	n	na	na		y
	2019-11-07	KapRNAI	L1N1	34	n	s	d	n	na		n
	2019-11-07	KapRNAI	L1N1	35	n	d	na	na	a		n/a
	2019-11-07	KapRNAI	L1N1	36	n	s	d	y	na		n/a
	2019-11-07	KapRNAI	L1N1	37	n	d	na	na	a		n/a
	2019-11-07	KapRNAI	L1N1	38	n	d	na	na	a		n/a
	2019-11-07	KapRNAI	L1N1	39	n	d	na	na	a		n/a
	2019-11-07	KapRNAI	L1N1	40	n	d	na	na	a		n/a
	2019-11-07	KapRNAI	L1N1	41	n	d	na	na	r		n
	2019-11-07	KapRNAI	L1N1	42	n	d	na	na	r		n

## Sheet: L2N1_7 11 19
	date	RNAi	movie name	comet number	in first frame	origin (soma, dendrite,axon)	approach axon/dendrite/no	enter axon/dendrite	polarity	angle of comet from axon	Turning events
	2019-11-07	KapRNAI	L2N1	1	y	a	na	na	a
	2019-11-07	KapRNAI	L2N1	2	y	s	n	na	na
	2019-11-07	KapRNAI	L2N1	3	y	s	a	y	n/a
	2019-11-07	KapRNAI	L2N1	4	y	s	a	n	n/a
	2019-11-07	KapRNAI	L2N1	5	y	s	n	na	na
	2019-11-07	KapRNAI	L2N1	6	n	s	a	y	n/a		n
	2019-11-07	KapRNAI	L2N1	7	n	s	a	y	n/a		n
	2019-11-07	KapRNAI	L2N1	8	y	s	d	n	n/a
	2019-11-07	KapRNAI	L2N1	9	y	s	n	na	na
	2019-11-07	KapRNAI	L2N1	10	y	s	n	na	na
	2019-11-07	KapRNAI	L2N1	11	y	s	n	na	na
	2019-11-07	KapRNAI	L2N1	12	y	s	n	na	na
	2019-11-07	KapRNAI	L2N1	13	n	s	n	na	na		n/a
	2019-11-07	KapRNAI	L2N1	14	n	s	n	na	na		n/a
	2019-11-07	KapRNAI	L2N1	15	n	s	n	na	na		n/a
	2019-11-07	KapRNAI	L2N1	16	n	s	n	na	na		n
	2019-11-07	KapRNAI	L2N1	17	n	s	n	na	na		n
	2019-11-07	KapRNAI	L2N1	18	y	s	n	na	na
	2019-11-07	KapRNAI	L2N1	19	y	s	n	na	na
	2019-11-07	KapRNAI	L2N1	20	n	s	n	na	na		n/a
	2019-11-07	KapRNAI	L2N1	21	n	s	d	n	n/a		n/a
	2019-11-07	KapRNAI	L2N1	22	n	s	n	na	na		n/a
	2019-11-07	KapRNAI	L2N1	23	n	s	n	na	na		n/a
	2019-11-07	KapRNAI	L2N1	24	n	s	n	na	na		n/a
	2019-11-07	KapRNAI	L2N1	25	n	s	a	y	n/a		n/a
	2019-11-07	KapRNAI	L2N1	26	n	s	n	na	na		n/a
	2019-11-07	KapRNAI	L2N1	27	n	s	a	y	n/a		n/a
	2019-11-07	KapRNAI	L2N1	28	n	s	a	y	n/a		n/a
	2019-11-07	KapRNAI	L2N1	29	n	s	n	na	na		n/a
	2019-11-07	KapRNAI	L2N1	30	n	s	a	n	n/a		n/a
	2019-11-07	KapRNAI	L2N1	31	n	s	n	na	na		n/a
	2019-11-07	KapRNAI	L2N1	32	n	s	n	na	na		n/a
	2019-11-07	KapRNAI	L2N1	33	n	s	n	na	na		n/a
	2019-11-07	KapRNAI	L2N1	34	n	s	a	n	n/a		n/a
	2019-11-07	KapRNAI	L2N1	35	n	s	n	na	na		n/a
	2019-11-07	KapRNAI	L2N1	36	n	s	n	na	na		n/a
	2019-11-07	KapRNAI	L2N1	37	n	s	n	na	na		n/a
	2019-11-07	KapRNAI	L2N1	38	n	s	n	na	na		n
	2019-11-07	KapRNAI	L2N1	39	n	s	n	na	na		n/a
	2019-11-07	KapRNAI	L2N1	40	n	s	n	na	na		n/a
	2019-11-07	KapRNAI	L2N1	41	n	s	n	na	na		n/a
	2019-11-07	KapRNAI	L2N1	42	n	s	n	na	na		n
	2019-11-07	KapRNAI	L2N1	43	n	s	a	y	n/a		n/a
	2019-11-07	KapRNAI	L2N1	44	n	s	n	na	na		n
	2019-11-07	KapRNAI	L2N1	45	n	d	na	na	r		n/a
	2019-11-07	KapRNAI	L2N1	46	n	d	na	na	r		n
	2019-11-07	KapRNAI	L2N1	47	n	s	d	y	n/a		n/a
	2019-11-07	KapRNAI	L2N1	48	n	d	na	na	a		n/a
	2019-11-07	KapRNAI	L2N1	49	n	s	n	na	na		n/a
	2019-11-07	KapRNAI	L2N1	50	n	s	d	y	n/a		n
	2019-11-07	KapRNAI	L2N1	51	n	s	d	n	n/a		n/a
	2019-11-07	KapRNAI	L2N1	52	n	d	na	na	a		n/a
	2019-11-07	KapRNAI	L2N1	53	y	s	n	na	na
	2019-11-07	KapRNAI	L2N1	54	y	s	n	na	na
	2019-11-07	KapRNAI	L2N1	55	n	d	na	na	r		n/a
	2019-11-07	KapRNAI	L2N1	56	n	s	n	na	na		n/a
	2019-11-07	KapRNAI	L2N1	57	n	s	d	y	n/a		n/a
	2019-11-07	KapRNAI	L2N1	58	n	d	na	na	a		n/a
	2019-11-07	KapRNAI	L2N1	59	n	d	na	na	a		n/a
	2019-11-07	KapRNAI	L2N1	60	n	d	na	na	r		n/a
	2019-11-07	KapRNAI	L2N1	61	n	d	na	na	a		n/a
	2019-11-07	KapRNAI	L2N1	62	n	s	n	na	na		n/a
	2019-11-07	KapRNAI	L2N1	63	n	s	n	na	na		n/a
	2019-11-07	KapRNAI	L2N1	64	n	s	n	na	na		y
	2019-11-07	KapRNAI	L2N1	65	n	s	n	na	na		n
	2019-11-07	KapRNAI	L2N1	66	n	s	n	na	na		n/a
	2019-11-07	KapRNAI	L2N1	67	n	s	n	na	na		n
	2019-11-07	KapRNAI	L2N1	68	n	s	n	na	na		n/a
	2019-11-07	KapRNAI	L2N1	69	n	s	a	n	n/a		n/a
	2019-11-07	KapRNAI	L2N1	70	n	s	n	na	na		n/a
	2019-11-07	KapRNAI	L2N1	71	n	s	n	na	na		n
	2019-11-07	KapRNAI	L2N1	72	n	s	n	na	na		n
	2019-11-07	KapRNAI	L2N1	73	n	s	n	na	na		n/a
	2019-11-07	KapRNAI	L2N1	74	n	s	n	na	na		n/a
	2019-11-07	KapRNAI	L2N1	75	n	s	n	na	na		n/a
	2019-11-07	KapRNAI	L2N1	76	n	a	na	na	a		n/a
	2019-11-07	KapRNAI	L2N1	77	n	s	n	na	na		n
	2019-11-07	KapRNAI	L2N1	78	n	s	d	n	n/a		n/a
	2019-11-07	KapRNAI	L2N1	79	n	s	n	na	na		n
	2019-11-07	KapRNAI	L2N1	80	n	s	n	na	na		n
	2019-11-07	KapRNAI	L2N1	81	n	d	na	na	a		n/a
	2019-11-07	KapRNAI	L2N1	82	n	d	na	na	r		n
	2019-11-07	KapRNAI	L2N1	83	n	d	na	na	r		n
	2019-11-07	KapRNAI	L2N1	84	n	s	n	na	na		n
	2019-11-07	KapRNAI	L2N1	85	n	s	a	y	n/a		n/a
	2019-11-07	KapRNAI	L2N1	86	n	s	n	na	na		n
	2019-11-07	KapRNAI	L2N1	87	n	s	a	y	n/a		y
	2019-11-07	KapRNAI	L2N1	88	n	s	n	na	na		n
	2019-11-07	KapRNAI	L2N1	89	n	s	n	na	na		n
	2019-11-07	KapRNAI	L2N1	90	n	s	n	na	na		n
	2019-11-07	KapRNAI	L2N1	91	n	s	n	na	na		n/a
	2019-11-07	KapRNAI	L2N1	92	n	s	n	na	na		n
	2019-11-07	KapRNAI	L2N1	93	n	s	n	na	na		n
	2019-11-07	KapRNAI	L2N1	94	n	s	a	y	n/a		n/a
	2019-11-07	KapRNAI	L2N1	95	n	s	n	na	na		n
	2019-11-07	KapRNAI	L2N1	96	n	s	n	na	na		y
	2019-11-07	KapRNAI	L2N1	97	n	s	n	na	na		n/a
	2019-11-07	KapRNAI	L2N1	98	n	d	na	na	a		n/a
	2019-11-07	KapRNAI	L2N1	99	n	s	d	n	n/a		n/a
	2019-11-07	KapRNAI	L2N1	100	n	s	d	n	n/a		n/a
	2019-11-07	KapRNAI	L2N1	101	n	d	na	na	a		n/a
	2019-11-07	KapRNAI	L2N1	102	n	d	na	na	r		n/a
	2019-11-07	KapRNAI	L2N1	103	n	s	n	na	na		n
	2019-11-07	KapRNAI	L2N1	104	n	d	na	na	a		n/a
	2019-11-07	KapRNAI	L2N1	105	n	s	n	na	na		n/a
	2019-11-07	KapRNAI	L2N1	106	n	s	n	na	na		n/a
	2019-11-07	KapRNAI	L2N1	107	n	s	a	y	n/a		n/a
	2019-11-07	KapRNAI	L2N1	108	n	s	a	n	n/a		n/a
	2019-11-07	KapRNAI	L2N1	109	n	s	n	na	na		n/a
	2019-11-07	KapRNAI	L2N1	110	n	s	n	na	na		n
	2019-11-07	KapRNAI	L2N1	111	n	s	n	na	na		n
	2019-11-07	KapRNAI	L2N1	112	n	s	n	na	na		n
	2019-11-07	KapRNAI	L2N1	113	n	s	n	na	na		n/a
	2019-11-07	KapRNAI	L2N1	114	n	s	n	na	na		n/a
	2019-11-07	KapRNAI	L2N1	115	n	s	n	na	na		n/a
	2019-11-07	KapRNAI	L2N1	116	n	d	na	na	r		n/a
	2019-11-07	KapRNAI	L2N1	117	n	s	n	na	na		n/a
	2019-11-07	KapRNAI	L2N1	118	n	d	na	na	r		n
	2019-11-07	KapRNAI	L2N1	119	n	s	n	na	na		n/a
	2019-11-07	KapRNAI	L2N1	120	n	s	n	na	na		n/a
	2019-11-07	KapRNAI	L2N1	121	n	d	na	na	r		n/a
	2019-11-07	KapRNAI	L2N1	122	n	s	n	na	na		n
	2019-11-07	KapRNAI	L2N1	123	n	d	na	na	a		n/a
	2019-11-07	KapRNAI	L2N1	124	n	d	na	na	a		n/a
	2019-11-07	KapRNAI	L2N1	125	n	d	na	na	a		n/a
	2019-11-07	KapRNAI	L2N1	126	n	s	n	na	na		n
	2019-11-07	KapRNAI	L2N1	127	n	s	n	na	na		n/a
	2019-11-07	KapRNAI	L2N1	128	n	s	n	na	na		n/a
	2019-11-07	KapRNAI	L2N1	129	n	s	n	na	na		n/a
	2019-11-07	KapRNAI	L2N1	130	n	s	n	na	na		n/a
	2019-11-07	KapRNAI	L2N1	131	n	d	na	na	r		n/a
	2019-11-07	KapRNAI	L2N1	132	n	s	n	na	na		n/a
	2019-11-07	KapRNAI	L2N1	133	n	d	na	na	a		n/a
	2019-11-07	KapRNAI	L2N1	134	n	d	na	na	r		n/a
	2019-11-07	KapRNAI	L2N1	135	n	s	n	na	na		n/a
	2019-11-07	KapRNAI	L2N1	136	n	d	na	na	r		n/a
	2019-11-07	KapRNAI	L2N1	137	n	s	n	na	na		n/a
	2019-11-07	KapRNAI	L2N1	138	n	s	d	n	n/a		n/a
	2019-11-07	KapRNAI	L2N1	139	n	s	n	na	na		n/a
	2019-11-07	KapRNAI	L2N1	140	n	s	n	na	na		n/a
	2019-11-07	KapRNAI	L2N1	141	n	d	na	na	r		n/a
	2019-11-07	KapRNAI	L2N1	142	n	d	na	na	a		n/a
	2019-11-07	KapRNAI	L2N1	143	n	s	n	na	na		n
	2019-11-07	KapRNAI	L2N1	144	n	d	na	na	a		n/a

## Sheet: L1N1_8 11 19
	date	RNAi	movie name	comet number	in first frame	origin (soma, dendrite,axon)	approach axon/dendrite/no	enter axon/dendrite	polarity	angle of comet from axon	Turning events
	2019-11-08	KapRNAI	L1N1	1	y	s	a	y	na
	2019-11-08	KapRNAI	L1N1	2	y	s	a	y	na
	2019-11-08	KapRNAI	L1N1	3	y	s	n	na	na
	2019-11-08	KapRNAI	L1N1	4	y	s	a	n	na
	2019-11-08	KapRNAI	L1N1	5	y	s	a	n	na
	2019-11-08	KapRNAI	L1N1	6	y	s	a	y	na
	2019-11-08	KapRNAI	L1N1	7	y	s	n	na	na
	2019-11-08	KapRNAI	L1N1	8	y	s	n	na	na
	2019-11-08	KapRNAI	L1N1	9	y	s	n	na	na
	2019-11-08	KapRNAI	L1N1	10	n	s	n	na	na		n/a
	2019-11-08	KapRNAI	L1N1	11	y	s	n	na	na
	2019-11-08	KapRNAI	L1N1	12	y	d	na	na	a
	2019-11-08	KapRNAI	L1N1	13	n	s	n	na	na		n/a
	2019-11-08	KapRNAI	L1N1	14	n	s	n	na	na		y
	2019-11-08	KapRNAI	L1N1	15	n	s	a	y	na		n
	2019-11-08	KapRNAI	L1N1	16	y	s	n	na	na
	2019-11-08	KapRNAI	L1N1	17	n	s	n	na	na		n/a
	2019-11-08	KapRNAI	L1N1	18	n	s	n	na	na		n/a
	2019-11-08	KapRNAI	L1N1	19	y	s	d	n	na
	2019-11-08	KapRNAI	L1N1	20	n	s	n	na	na		n
	2019-11-08	KapRNAI	L1N1	21	n	s	a	y	na		n/a
	2019-11-08	KapRNAI	L1N1	22	y	s	n	na	na
	2019-11-08	KapRNAI	L1N1	23	n	s	n	na	na		n
	2019-11-08	KapRNAI	L1N1	24	n	d	na	na	a		n/a
	2019-11-08	KapRNAI	L1N1	25	y	d	na	na	a
	2019-11-08	KapRNAI	L1N1	26	y	s	n	na	na
	2019-11-08	KapRNAI	L1N1	27	n	d	na	na	r		n/a
	2019-11-08	KapRNAI	L1N1	28	n	d	na	na	r		n
	2019-11-08	KapRNAI	L1N1	29	n	s	d	n	na		n
	2019-11-08	KapRNAI	L1N1	30	n	s	d	n	na		n
	2019-11-08	KapRNAI	L1N1	31	n	s	n	na	na		n/a
	2019-11-08	KapRNAI	L1N1	32	n	s	n	na	na		y
	2019-11-08	KapRNAI	L1N1	33	n	s	n	na	na		n/a
	2019-11-08	KapRNAI	L1N1	34	n	s	d	n	na		n/a
	2019-11-08	KapRNAI	L1N1	35	n	s	n	na	na		n/a
	2019-11-08	KapRNAI	L1N1	36	n	s	n	na	na		n/a
	2019-11-08	KapRNAI	L1N1	37	n	a	na	na	a		n/a
	2019-11-08	KapRNAI	L1N1	38	n	s	n	na	na		n
	2019-11-08	KapRNAI	L1N1	39	n	s	n	na	na		y
	2019-11-08	KapRNAI	L1N1	40	n	s	a	n	na		n
	2019-11-08	KapRNAI	L1N1	41	n	s	n	na	na		n/a
	2019-11-08	KapRNAI	L1N1	42	n	s	n	na	na		n
	2019-11-08	KapRNAI	L1N1	43	n	d	na	na	a		n/a
	2019-11-08	KapRNAI	L1N1	44	n	s	a	n	na		n/a
	2019-11-08	KapRNAI	L1N1	45	n	s	d	y	na		n/a
	2019-11-08	KapRNAI	L1N1	46	n	s	d	n	na		n/a
	2019-11-08	KapRNAI	L1N1	47	n	a	na	na	a		n/a
	2019-11-08	KapRNAI	L1N1	48	n	s	a	y	na		n
	2019-11-08	KapRNAI	L1N1	49	n	s	a	y	na		n
	2019-11-08	KapRNAI	L1N1	50	n	s	n	na	na		n/a
	2019-11-08	KapRNAI	L1N1	51	n	s	n	na	na		n
	2019-11-08	KapRNAI	L1N1	52	n	s	n	na	na		n
	2019-11-08	KapRNAI	L1N1	53	n	s	n	na	na		n
	2019-11-08	KapRNAI	L1N1	54	y	s	n	na	na
	2019-11-08	KapRNAI	L1N1	55	n	s	n	na	na		n
	2019-11-08	KapRNAI	L1N1	56	n	s	n	na	na		n/a
	2019-11-08	KapRNAI	L1N1	57	n	s	a	y	na		n
	2019-11-08	KapRNAI	L1N1	58	n	s	a	y	na		n/a
	2019-11-08	KapRNAI	L1N1	59	n	s	n	na	na		n
	2019-11-08	KapRNAI	L1N1	60	n	a	na	na	r		n/a
	2019-11-08	KapRNAI	L1N1	61	n	s	n	na	na		n
	2019-11-08	KapRNAI	L1N1	62	n	s	d	n	na		n/a
	2019-11-08	KapRNAI	L1N1	63	n	s	n	na	na		n
	2019-11-08	KapRNAI	L1N1	64	n	s	n	na	na		n
	2019-11-08	KapRNAI	L1N1	65	n	s	n	na	na		n/a
	2019-11-08	KapRNAI	L1N1	66	n	s	d	n	na		n/a
	2019-11-08	KapRNAI	L1N1	67	n	d	na	na	r		n/a
	2019-11-08	KapRNAI	L1N1	68	n	s	n	na	na		n
	2019-11-08	KapRNAI	L1N1	69	y	s	n	na	na
	2019-11-08	KapRNAI	L1N1	70	n	s	n	na	na		n
	2019-11-08	KapRNAI	L1N1	71	n	s	n	na	na		n/a
	2019-11-08	KapRNAI	L1N1	72	y	s	n	na	na
	2019-11-08	KapRNAI	L1N1	73	n	s	n	na	na		n
	2019-11-08	KapRNAI	L1N1	74	n	s	n	na	na		n/a
	2019-11-08	KapRNAI	L1N1	75	n	s	n	na	na		n/a
	2019-11-08	KapRNAI	L1N1	76	n	s	n	na	na		n/a
	2019-11-08	KapRNAI	L1N1	77	n	s	n	na	na		n/a
	2019-11-08	KapRNAI	L1N1	78	n	a	na	na	a		n/a
	2019-11-08	KapRNAI	L1N1	79	n	s	d	y	na		n/a
	2019-11-08	KapRNAI	L1N1	80	n	d	na	na	r		n/a
	2019-11-08	KapRNAI	L1N1	81	n	d	na	na	r		n
	2019-11-08	KapRNAI	L1N1	82	n	s	d	y	na		n/a
	2019-11-08	KapRNAI	L1N1	83	n	s	d	n	na		n/a
	2019-11-08	KapRNAI	L1N1	84	n	s	n	na	na		n/a
	2019-11-08	KapRNAI	L1N1	85	n	s	d	y	na		n/a
	2019-11-08	KapRNAI	L1N1	86	n	s	n	na	na		n
	2019-11-08	KapRNAI	L1N1	87	n	s	d	y	na		n/a
	2019-11-08	KapRNAI	L1N1	88	n	s	n	na	na		n/a
	2019-11-08	KapRNAI	L1N1	89	n	s	n	na	na		n
	2019-11-08	KapRNAI	L1N1	90	n	d	na	na	a		n/a
	2019-11-08	KapRNAI	L1N1	91	n	d	na	na	a		n/a
	2019-11-08	KapRNAI	L1N1	92	n	d	na	na	a		n/a
	2019-11-08	KapRNAI	L1N1	93	n	d	na	na	a		n/a
	2019-11-08	KapRNAI	L1N1	94	n	d	na	na	r		n/a
	2019-11-08	KapRNAI	L1N1	95	n	d	na	na	a		n/a
	2019-11-08	KapRNAI	L1N1	96	n	d	na	na	a		n/a
	2019-11-08	KapRNAI	L1N1	97	n	d	na	na	a		n/a
	2019-11-08	KapRNAI	L1N1	98	n	d	na	na	r		n/a
	2019-11-08	KapRNAI	L1N1	99	n	s	n	na	na		n
	2019-11-08	KapRNAI	L1N1	100	n	s	a	y	na		n
	2019-11-08	KapRNAI	L1N1	101	n	s	n	na	na		n
	2019-11-08	KapRNAI	L1N1	102	n	s	n	na	na		n
	2019-11-08	KapRNAI	L1N1	103	n	s	a	y	na		n
	2019-11-08	KapRNAI	L1N1	104	n	s	n	na	na		n
	2019-11-08	KapRNAI	L1N1	105	n	s	n	na	na		n/a
	2019-11-08	KapRNAI	L1N1	106	n	s	a	n	na		n/a
	2019-11-08	KapRNAI	L1N1	107	n	s	n	na	na		n
	2019-11-08	KapRNAI	L1N1	108	n	s	n	na	na		n/a
	2019-11-08	KapRNAI	L1N1	109	n	s	d	n	na		n/a
	2019-11-08	KapRNAI	L1N1	110	n	s	d	n	na		n/a
	2019-11-08	KapRNAI	L1N1	111	n	s	n	na	na		n
	2019-11-08	KapRNAI	L1N1	112	n	s	n	na	na		y
	2019-11-08	KapRNAI	L1N1	113	n	s	n	na	na		n/a
	2019-11-08	KapRNAI	L1N1	114	n	s	n	na	na		n
	2019-11-08	KapRNAI	L1N1	115	n	s	n	na	na		n/a
	2019-11-08	KapRNAI	L1N1	116	n	s	n	na	na		n/a
	2019-11-08	KapRNAI	L1N1	117	n	s	n	na	na		n
	2019-11-08	KapRNAI	L1N1	118	n	s	n	na	na		n
	2019-11-08	KapRNAI	L1N1	119	n	s	n	na	na		n
	2019-11-08	KapRNAI	L1N1	120	n	s	n	na	na		y
	2019-11-08	KapRNAI	L1N1	121	n	s	n	na	na		n/a
	2019-11-08	KapRNAI	L1N1	122	n	s	n	na	na		n
	2019-11-08	KapRNAI	L1N1	123	n	s	n	na	na		n/a
	2019-11-08	KapRNAI	L1N1	124	n	s	n	na	na		n
	2019-11-08	KapRNAI	L1N1	125	n	s	n	na	na		n/a
	2019-11-08	KapRNAI	L1N1	126	n	s	n	na	na		n/a
	2019-11-08	KapRNAI	L1N1	127	n	s	n	na	na		n/a
	2019-11-08	KapRNAI	L1N1	128	n	s	n	na	na		n/a
	2019-11-08	KapRNAI	L1N1	129	n	s	n	na	na		n/a
	2019-11-08	KapRNAI	L1N1	130	n	s	n	na	na		n
	2019-11-08	KapRNAI	L1N1	131	n	s	n	na	na		n
	2019-11-08	KapRNAI	L1N1	132	n	s	n	na	na		n
	2019-11-08	KapRNAI	L1N1	133	n	s	n	na	na		n/a
	2019-11-08	KapRNAI	L1N1	134	n	s	n	na	na		n/a
	2019-11-08	KapRNAI	L1N1	135	n	s	n	na	na		n/a
	2019-11-08	KapRNAI	L1N1	136	n	d	na	na	r		n/a
	2019-11-08	KapRNAI	L1N1	137	n	s	n	na	na		n/a
	2019-11-08	KapRNAI	L1N1	138	n	a	na	na	a		n/a
	2019-11-08	KapRNAI	L1N1	139	n	s	n	na	na		n/a
	2019-11-08	KapRNAI	L1N1	140	n	s	n	na	na		n/a
	2019-11-08	KapRNAI	L1N1	141	n	s	n	na	na		n/a
	2019-11-08	KapRNAI	L1N1	142	n	s	a	y	na		n/a
	2019-11-08	KapRNAI	L1N1	143	n	s	a	y	na		n/a
	2019-11-08	KapRNAI	L1N1	144	n	s	n	na	na		n/a
	2019-11-08	KapRNAI	L1N1	145	n	s	n	na	na		n/a
	2019-11-08	KapRNAI	L1N1	146	n	d	na	na	r		n/a
	2019-11-08	KapRNAI	L1N1	147	n	s	n	na	na		n/a
	2019-11-08	KapRNAI	L1N1	148	n	s	n	na	na		n/a
	2019-11-08	KapRNAI	L1N1	149	n	s	n	na	na		n/a

## Sheet: L1N1_9 11 19
	date	RNAi	movie name	comet number	in first frame	origin (soma, dendrite,axon)	approach axon/dendrite/no	enter axon/dendrite	polarity	angle of comet from axon	Turning events
	2019-11-09	KapRNAI	L1N1	1	y	s	n	n/a	n/a
	2019-11-09	KapRNAI	L1N1	2	y	s	n	n/a	n/a
	2019-11-09	KapRNAI	L1N1	3	y	s	n	n/a	n/a
	2019-11-09	KapRNAI	L1N1	4	y	s	n	n/a	n/a
	2019-11-09	KapRNAI	L1N1	5	y	s	n	n/a	n/a
	2019-11-09	KapRNAI	L1N1	6	y	d	n/a	n/a	a
	2019-11-09	KapRNAI	L1N1	7	y	s	d	n	n/a
	2019-11-09	KapRNAI	L1N1	8	y	s	d	y	n/a
	2019-11-09	KapRNAI	L1N1	9	y	s	n	n/a	n/a
	2019-11-09	KapRNAI	L1N1	10	n	s	n	n/a	n/a		n/a
	2019-11-09	KapRNAI	L1N1	11	n	s	a	n	n/a		n
	2019-11-09	KapRNAI	L1N1	12	y	s	n	n/a	n/a
	2019-11-09	KapRNAI	L1N1	13	y	s	n	n/a	n/a
	2019-11-09	KapRNAI	L1N1	14	y	a	n/a	n/a	a
	2019-11-09	KapRNAI	L1N1	15	n	a	n/a	n/a	a		n/a
	2019-11-09	KapRNAI	L1N1	16	n	a	n/a	n/a	a		n/a
	2019-11-09	KapRNAI	L1N1	17	n	a	n/a	n/a	a		n/a
	2019-11-09	KapRNAI	L1N1	18	n	s	n	n/a	n/a		n
	2019-11-09	KapRNAI	L1N1	19	n	s	n	n/a	n/a		n/a
	2019-11-09	KapRNAI	L1N1	20	n	s	n	n/a	n/a		n/a
	2019-11-09	KapRNAI	L1N1	21	n	s	n	n/a	n/a		n/a
	2019-11-09	KapRNAI	L1N1	22	n	s	n	n/a	n/a		n/a
	2019-11-09	KapRNAI	L1N1	23	n	s	n	n/a	n/a		n
	2019-11-09	KapRNAI	L1N1	24	n	s	d	n	n/a		n
	2019-11-09	KapRNAI	L1N1	25	n	s	n	n/a	n/a		n
	2019-11-09	KapRNAI	L1N1	26	n	s	n	n/a	n/a		n/a
	2019-11-09	KapRNAI	L1N1	27	n	s	a	y	n/a		n
	2019-11-09	KapRNAI	L1N1	28	n	d	n/a	n/a	a		n/a
	2019-11-09	KapRNAI	L1N1	29	y	d	n/a	n/a	r
	2019-11-09	KapRNAI	L1N1	30	n	d	n/a	n/a	a		n/a
	2019-11-09	KapRNAI	L1N1	31	n	d	n/a	n/a	a		n/a
	2019-11-09	KapRNAI	L1N1	32	y	s	d	n	n/a
	2019-11-09	KapRNAI	L1N1	33	y	s	d	n	n/a
	2019-11-09	KapRNAI	L1N1	34	n	s	n	n/a	n/a		n/a
	2019-11-09	KapRNAI	L1N1	35	n	s	n	n/a	n/a		n/a
	2019-11-09	KapRNAI	L1N1	36	n	a	n/a	n/a	a		n/a
	2019-11-09	KapRNAI	L1N1	37	n	s	n	n/a	n/a		n/a
	2019-11-09	KapRNAI	L1N1	38	n	s	n	n/a	n/a		n
	2019-11-09	KapRNAI	L1N1	39	n	s	n	n/a	n/a		n/a
	2019-11-09	KapRNAI	L1N1	40	n	s	n	n/a	n/a		n
	2019-11-09	KapRNAI	L1N1	41	n	s	n	n/a	n/a		n/a
	2019-11-09	KapRNAI	L1N1	42	n	s	n	n/a	n/a		n/a
	2019-11-09	KapRNAI	L1N1	43	n	a	n/a	n/a	a		n/a
	2019-11-09	KapRNAI	L1N1	44	n	a	n/a	n/a	a		n/a
	2019-11-09	KapRNAI	L1N1	45	n	a	n/a	n/a	a		n/a
	2019-11-09	KapRNAI	L1N1	46	n	s	n	n/a	n/a		n/a
	2019-11-09	KapRNAI	L1N1	47	n	s	n	n/a	n/a		n/a
	2019-11-09	KapRNAI	L1N1	48	n	s	n	n/a	n/a		n/a
	2019-11-09	KapRNAI	L1N1	49	n	s	a	n	n/a		n/a
	2019-11-09	KapRNAI	L1N1	50	n	s	n	n/a	n/a		n/a
	2019-11-09	KapRNAI	L1N1	51	n	s	d	n	n/a		n/a
	2019-11-09	KapRNAI	L1N1	52	n	s	n	n/a	n/a		n/a
	2019-11-09	KapRNAI	L1N1	53	n	s	n	n/a	n/a		n/a
	2019-11-09	KapRNAI	L1N1	54	n	s	n	n/a	n/a		n/a
	2019-11-09	KapRNAI	L1N1	55	n	a	n/a	n/a	r		n/a
	2019-11-09	KapRNAI	L1N1	56	n	s	d	y	n/a		n/a
	2019-11-09	KapRNAI	L1N1	57	n	d	n/a	n/a	r		n
	2019-11-09	KapRNAI	L1N1	58	n	s	n	n/a	n/a		n/a
	2019-11-09	KapRNAI	L1N1	59	y	s	n	n/a	n/a
	2019-11-09	KapRNAI	L1N1	60	n	s	n	n/a	n/a		n/a
	2019-11-09	KapRNAI	L1N1	61	n	s	n	n/a	n/a		n/a
	2019-11-09	KapRNAI	L1N1	62	n	s	n	n/a	n/a		n/a
	2019-11-09	KapRNAI	L1N1	63	n	s	n	n/a	n/a		n
	2019-11-09	KapRNAI	L1N1	64	n	s	n	n/a	n/a		n/a
	2019-11-09	KapRNAI	L1N1	65	n	d	n/a	n/a	r		n
	2019-11-09	KapRNAI	L1N1	66	n	s	n	n/a	n/a		n/a
	2019-11-09	KapRNAI	L1N1	67	n	s	n	n/a	n/a		n/a
	2019-11-09	KapRNAI	L1N1	68	n	s	n	n/a	n/a		n/a
	2019-11-09	KapRNAI	L1N1	69	n	s	n	n/a	n/a		n/a
	2019-11-09	KapRNAI	L1N1	70	n	s	d	n	n/a		n/a
	2019-11-09	KapRNAI	L1N1	71	n	s	n	n/a	n/a		n/a
	2019-11-09	KapRNAI	L1N1	72	n	s	n	n/a	n/a		n/a
	2019-11-09	KapRNAI	L1N1	73	n	s	n	n/a	n/a		n
	2019-11-09	KapRNAI	L1N1	74	n	s	n	n/a	n/a		n/a
	2019-11-09	KapRNAI	L1N1	75	n	s	n	n/a	n/a		y
	2019-11-09	KapRNAI	L1N1	76	n	d	n/a	n/a	a		n/a
	2019-11-09	KapRNAI	L1N1	77	n	d	n/a	n/a	a		n/a
	2019-11-09	KapRNAI	L1N1	78	n	s	n	n/a	n/a		n/a
	2019-11-09	KapRNAI	L1N1	79	n	d	n/a	n/a	r		n/a
	2019-11-09	KapRNAI	L1N1	80	n	s	n	n/a	n/a		n/a
	2019-11-09	KapRNAI	L1N1	81	n	s	n	n/a	n/a		n
	2019-11-09	KapRNAI	L1N1	82	n	s	n	n/a	n/a		n/a
	2019-11-09	KapRNAI	L1N1	83	n	s	n	n/a	n/a		n/a
	2019-11-09	KapRNAI	L1N1	84	n	s	d	y	n/a		n
	2019-11-09	KapRNAI	L1N1	85	n	s	n	n/a	n/a		n
	2019-11-09	KapRNAI	L1N1	86	n	s	a	y	n/a		n
	2019-11-09	KapRNAI	L1N1	87	n	d	n/a	n/a	a		n/a
	2019-11-09	KapRNAI	L1N1	88	n	d	n/a	n/a	r		n/a
	2019-11-09	KapRNAI	L1N1	89	n	s	n	n/a	n/a		n
	2019-11-09	KapRNAI	L1N1	90	n	s	a	y	n/a		n
	2019-11-09	KapRNAI	L1N1	91	n	s	n	n/a	n/a		n
	2019-11-09	KapRNAI	L1N1	92	n	s	d	y	n/a		n/a
	2019-11-09	KapRNAI	L1N1	93	n	s	n	n/a	n/a		n/a
	2019-11-09	KapRNAI	L1N1	94	n	s	n	n/a	n/a		n/a
	2019-11-09	KapRNAI	L1N1	95	y	d	n/a	n/a	r
	2019-11-09	KapRNAI	L1N1	96	y	d	n/a	n/a	a
	2019-11-09	KapRNAI	L1N1	97	n	d	n/a	n/a	a		n/a
	2019-11-09	KapRNAI	L1N1	98	n	d	n/a	n/a	r		n
	2019-11-09	KapRNAI	L1N1	99	n	d	n/a	n/a	a		n/a
	2019-11-09	KapRNAI	L1N1	100	n	d	n/a	n/a	r		n/a
	2019-11-09	KapRNAI	L1N1	101	n	d	n/a	n/a	a		n/a
	2019-11-09	KapRNAI	L1N1	102	n	d	n/a	n/a	a		n/a
	2019-11-09	KapRNAI	L1N1	103	n	d	n/a	n/a	a		n/a
	2019-11-09	KapRNAI	L1N1	104	n	d	n/a	n/a	a		n/a
	2019-11-09	KapRNAI	L1N1	105	n	d	n/a	n/a	a		n/a
	2019-11-09	KapRNAI	L1N1	106	n	s	d	y	n/a		n/a
	2019-11-09	KapRNAI	L1N1	107	n	d	n/a	n/a	a		n/a
	2019-11-09	KapRNAI	L1N1	108	n	s	d	y	n/a		n/a
	2019-11-09	KapRNAI	L1N1	109	n	d	n/a	n/a	a		n/a
	2019-11-09	KapRNAI	L1N1	110	n	s	d	y	n/a		n
	2019-11-09	KapRNAI	L1N1	111	n	s	d	y	n/a		n/a
	2019-11-09	KapRNAI	L1N1	112	n	d	n/a	n/a	a		n/a
	2019-11-09	KapRNAI	L1N1	113	n	d	n/a	n/a	a		n/a
	2019-11-09	KapRNAI	L1N1	115	n	d	n/a	n/a	a		n/a
	2019-11-09	KapRNAI	L1N1	116	n	d	n/a	n/a	a		n/a
	2019-11-09	KapRNAI	L1N1	117	n	d	n/a	n/a	a		n/a
	2019-11-09	KapRNAI	L1N1	118	n	s	d	n	n/a		n
	2019-11-09	KapRNAI	L1N1	119	n	s	n	n/a	n/a		n
	2019-11-09	KapRNAI	L1N1	120	n	s	n	n/a	n/a		n/a
	2019-11-09	KapRNAI	L1N1	121	n	d	n/a	n/a	a		n/a
	2019-11-09	KapRNAI	L1N1	122	n	d	n/a	n/a	r		n/a
	2019-11-09	KapRNAI	L1N1	123	n	s	d	y	n/a		n/a
	2019-11-09	KapRNAI	L1N1	124	n	d	n/a	n/a	a		n/a
	2019-11-09	KapRNAI	L1N1	125	n	s	d	y	n/a		n
	2019-11-09	KapRNAI	L1N1	126	n	s	d	n	n/a		n
	2019-11-09	KapRNAI	L1N1	127	n	d	n/a	n/a	a		n/a
	2019-11-09	KapRNAI	L1N1	128	n	a	n/a	n/a	a		n/a
	2019-11-09	KapRNAI	L1N1	129	n	s	n	n/a	n/a		n
	2019-11-09	KapRNAI	L1N1	130	n	a	n/a	n/a	a		n/a
	2019-11-09	KapRNAI	L1N1	131	n	a	n/a	n/a	a		n/a
	2019-11-09	KapRNAI	L1N1	132	n	a	n/a	n/a	a		n/a
	2019-11-09	KapRNAI	L1N1	133	n	s	n	n/a	n/a		n
	2019-11-09	KapRNAI	L1N1	134	n	s	n	n/a	n/a		n
	2019-11-09	KapRNAI	L1N1	135	n	s	n	n/a	n/a		n/a
	2019-11-09	KapRNAI	L1N1	136	n	s	n	n/a	n/a		n
	2019-11-09	KapRNAI	L1N1	137	n	s	n	n/a	n/a		n/a
	2019-11-09	KapRNAI	L1N1	138	n	a	n/a	n/a	a		n/a
	2019-11-09	KapRNAI	L1N1	139	n	a	n/a	n/a	a		n/a
	2019-11-09	KapRNAI	L1N1	140	n	s	n	n/a	n/a		n/a
	2019-11-09	KapRNAI	L1N1	141	n	s	n	n/a	n/a		n/a
	2019-11-09	KapRNAI	L1N1	142	n	s	n	n/a	n/a		n/a
	2019-11-09	KapRNAI	L1N1	143	n	s	n	n/a	n/a		n
	2019-11-09	KapRNAI	L1N1	144	n	s	n	n/a	n/a		n/a
	2019-11-09	KapRNAI	L1N1	145	y	s	d	n	n/a
	2019-11-09	KapRNAI	L1N1	146	n	s	n	n/a	n/a		n/a
	2019-11-09	KapRNAI	L1N1	147	n	s	n	n/a	n/a		n/a
	2019-11-09	KapRNAI	L1N1	148	n	s	n	n/a	n/a		n/a
	2019-11-09	KapRNAI	L1N1	149	n	s	n	n/a	n/a		n/a
	2019-11-09	KapRNAI	L1N1	150	n	s	n	n/a	n/a		n
	2019-11-09	KapRNAI	L1N1	151	n	s	n	n/a	n/a		n/a
	2019-11-09	KapRNAI	L1N1	152	n	s	n	n/a	n/a		n/a
	2019-11-09	KapRNAI	L1N1	153	n	s	n	n/a	n/a		n/a
	2019-11-09	KapRNAI	L1N1	154	n	s	n	n/a	n/a		n/a
	2019-11-09	KapRNAI	L1N1	155	n	s	n	n/a	n/a		n
	2019-11-09	KapRNAI	L1N1	156	n	s	n	n/a	n/a		n
	2019-11-09	KapRNAI	L1N1	157	n	s	n	n/a	n/a		n/a
	2019-11-09	KapRNAI	L1N1	158	n	s	n	n/a	n/a		n/a
	2019-11-09	KapRNAI	L1N1	159	n	s	n	n/a	n/a		n/a
	2019-11-09	KapRNAI	L1N1	160	n	s	n	n/a	n/a		n/a
	2019-11-09	KapRNAI	L1N1	161	n	s	n	n/a	n/a		n
	2019-11-09	KapRNAI	L1N1	162	n	s	n	n/a	n/a		n/a
	2019-11-09	KapRNAI	L1N1	163	n	s	n	n/a	n/a		n/a
	2019-11-09	KapRNAI	L1N1	164	n	s	n	n/a	n/a		n/a
	2019-11-09	KapRNAI	L1N1	165	n	s	n	n/a	n/a		n/a
	2019-11-09	KapRNAI	L1N1	166	n	s	n	n/a	n/a		n/a
	2019-11-09	KapRNAI	L1N1	167	n	s	n	n/a	n/a		n
	2019-11-09	KapRNAI	L1N1	168	n	s	n	n/a	n/a		n/a
	2019-11-09	KapRNAI	L1N1	169	n	s	n	n/a	n/a		n/a
	2019-11-09	KapRNAI	L1N1	170	n	s	n	n/a	n/a		n/a
	2019-11-09	KapRNAI	L1N1	171	n	s	n	n/a	n/a		n/a
	2019-11-09	KapRNAI	L1N1	172	n	s	n	n/a	n/a		n/a
	2019-11-09	KapRNAI	L1N1	173	n	s	n	n/a	n/a		n/a
	2019-11-09	KapRNAI	L1N1	174	n	s	n	n/a	n/a		n/a
	2019-11-09	KapRNAI	L1N1	175	n	s	n	n/a	n/a		n/a
	2019-11-09	KapRNAI	L1N1	176	n	s	n	n/a	n/a		n
	2019-11-09	KapRNAI	L1N1	177	n	s	n	n/a	n/a		n/a
	2019-11-09	KapRNAI	L1N1	178	n	s	n	n/a	n/a		n/a
	2019-11-09	KapRNAI	L1N1	179	n	s	d	n	n/a		n/a
	2019-11-09	KapRNAI	L1N1	180	n	s	n	n/a	n/a		n/a
	2019-11-09	KapRNAI	L1N1	181	n	s	n	n/a	n/a		n/a
	2019-11-09	KapRNAI	L1N1	182	n	s	n	n/a	n/a		n/a

## Sheet: L4N1_1 11 19
	date	RNAi	movie name	comet number	in first frame	origin (soma, dendrite,axon)	approach axon/dendrite/no	enter axon/dendrite	polarity	angle of comet from axon	Turning events
	2019-11-07	KapRNAI	L4N1	1	y	s	d	n	n/a
	2019-11-07	KapRNAI	L4N1	2	y	s	d	y	n/a
	2019-11-07	KapRNAI	L4N1	3	y	s	n	n/a	n/a
	2019-11-07	KapRNAI	L4N1	4	n	s	n	n/a	n/a		n
	2019-11-07	KapRNAI	L4N1	5	y	d	n/a	n/a	a
	2019-11-07	KapRNAI	L4N1	6	y	s	n	n/a	n/a
	2019-11-07	KapRNAI	L4N1	7	n	d	n/a	n/a	r		n
	2019-11-07	KapRNAI	L4N1	8	n	d	n/a	n/a	a		n/a
	2019-11-07	KapRNAI	L4N1	9	y	d	n/a	n/a	r
	2019-11-07	KapRNAI	L4N1	10	n	d	n/a	n/a	a		n/a
	2019-11-07	KapRNAI	L4N1	11	n	d	n/a	n/a	a		n/a
	2019-11-07	KapRNAI	L4N1	12	n	d	n/a	n/a	r		n/a
	2019-11-07	KapRNAI	L4N1	13	n	d	n/a	n/a	r		n/a
	2019-11-07	KapRNAI	L4N1	14	n	s	n	n/a	n/a		n
	2019-11-07	KapRNAI	L4N1	15	n	d	n/a	n/a	r		n/a
	2019-11-07	KapRNAI	L4N1	16	n	s	n	n/a	n/a		n/a
	2019-11-07	KapRNAI	L4N1	17	n	s	n	n/a	n/a		n
	2019-11-07	KapRNAI	L4N1	18	n	s	n	n/a	n/a		n/a
	2019-11-07	KapRNAI	L4N1	19	n	d	n/a	n/a	a		n/a
	2019-11-07	KapRNAI	L4N1	20	n	s	d	y	n/a		n/a
	2019-11-07	KapRNAI	L4N1	21	n	s	d	y	n/a		n/a
	2019-11-07	KapRNAI	L4N1	22	n	s	d	y	n/a		n/a
	2019-11-07	KapRNAI	L4N1	23	n	d	n/a	n/a	r		n/a
	2019-11-07	KapRNAI	L4N1	24	n	d	n/a	n/a	r		n/a
	2019-11-07	KapRNAI	L4N1	25	n	s	d	n	n/a		n/a
	2019-11-07	KapRNAI	L4N1	26	n	s	d	y	n/a		n/a
	2019-11-07	KapRNAI	L4N1	27	n	s	d	y	n/a		n/a
	2019-11-07	KapRNAI	L4N1	28	n	d	n/a	n/a	a		n/a
	2019-11-07	KapRNAI	L4N1	29	n	d	n/a	n/a	a		n/a
	2019-11-07	KapRNAI	L4N1	30	y	d	n/a	n/a	a
	2019-11-07	KapRNAI	L4N1	31	n	d	n/a	n/a	a		n/a
	2019-11-07	KapRNAI	L4N1	32	n	d	n/a	n/a	r		n
	2019-11-07	KapRNAI	L4N1	33	y	s	n	n/a	n/a
	2019-11-07	KapRNAI	L4N1	34	n	s	d	n/a	n/a	end of movie	n/a
	2019-11-07	KapRNAI	L4N1	35	n	d	n/a	n/a	a		n/a
	2019-11-07	KapRNAI	L4N1	36	n	d	n/a	n/a	r		y
	2019-11-07	KapRNAI	L4N1	37	n	s	d	n	n/a		n/a
	2019-11-07	KapRNAI	L4N1	38	y	s	n	n/a	n/a
	2019-11-07	KapRNAI	L4N1	39	n	d	n/a	n/a	a		n/a
	2019-11-07	KapRNAI	L4N1	40	n	d	n/a	n/a	r		n/a
	2019-11-07	KapRNAI	L4N1	41	n	d	n/a	n/a	a		n/a
	2019-11-07	KapRNAI	L4N1	42	n	d	n/a	n/a	r			from frame 1
	2019-11-07	KapRNAI	L4N1	43	n	d	n/a	n/a	r		n/a
	2019-11-07	KapRNAI	L4N1	44	n	d	n/a	n/a	a		n/a
	2019-11-07	KapRNAI	L4N1	45	y	d	n/a	n/a	a
	2019-11-07	KapRNAI	L4N1	46	n	d	n/a	n/a	a		n/a
	2019-11-07	KapRNAI	L4N1	47	n	d	n/a	n/a	a		n/a
	2019-11-07	KapRNAI	L4N1	48	n	d	n/a	n/a	r		n
	2019-11-07	KapRNAI	L4N1	49	n	d	n/a	n/a	r		n/a
	2019-11-07	KapRNAI	L4N1	50	n	s	d	y	n/a		n/a
	2019-11-07	KapRNAI	L4N1	51	n	d	n/a	n/a	a		n/a
	2019-11-07	KapRNAI	L4N1	52	n	s	d	y	n/a		n/a
	2019-11-07	KapRNAI	L4N1	53	n	s	d	n	n/a		n/a
	2019-11-07	KapRNAI	L4N1	54	n	d	n/a	n/a	r		n/a
	2019-11-07	KapRNAI	L4N1	55	n	d	n/a	n/a	a		n/a
	2019-11-07	KapRNAI	L4N1	56	n	d	n/a	n/a	r		n/a
	2019-11-07	KapRNAI	L4N1	57	n	d	n/a	n/a	r		n
	2019-11-07	KapRNAI	L4N1	58	n	d	n/a	n/a	a		n/a
	2019-11-07	KapRNAI	L4N1	59	n	d	n/a	n/a	a		n/a
	2019-11-07	KapRNAI	L4N1	60	n	d	n/a	n/a	a		n/a
	2019-11-07	KapRNAI	L4N1	61	n	d	n/a	n/a	a		n/a
	2019-11-07	KapRNAI	L4N1	62	n	d	n/a	n/a	a		n/a
	2019-11-07	KapRNAI	L4N1	63	n	s	n	n/a	n/a		n
	2019-11-07	KapRNAI	L4N1	64	n	d	n/a	n/a	a		n/a
	2019-11-07	KapRNAI	L4N1	65	n	d	n/a	n/a	r		n/a
	2019-11-07	KapRNAI	L4N1	66	n	s	n	n/a	n/a		n/a
	2019-11-07	KapRNAI	L4N1	67	n	d	n/a	n/a	a		n/a
	2019-11-07	KapRNAI	L4N1	68	n	s	d	y	n/a		n/a
	2019-11-07	KapRNAI	L4N1	69	n	d	n/a	n/a	r		n/a
	2019-11-07	KapRNAI	L4N1	70	n	d	n/a	n/a	r		n/a
	2019-11-07	KapRNAI	L4N1	71	n	d	n/a	n/a	r		n/a
	2019-11-07	KapRNAI	L4N1	72	n	s	n	n/a	n/a		n/a
	2019-11-07	KapRNAI	L4N1	73	n	d	n/a	n/a	r		n/a
	2019-11-07	KapRNAI	L4N1	74	n	s	n	n/a	n/a		n/a
	2019-11-07	KapRNAI	L4N1	75	n	s	n	n/a	n/a		n/a
	2019-11-07	KapRNAI	L4N1	76	n	s	n	n/a	n/a		n/a
	2019-11-07	KapRNAI	L4N1	77	n	s	n	n/a	n/a		n
	2019-11-07	KapRNAI	L4N1	78	n	s	n	n/a	n/a		n/a
	2019-11-07	KapRNAI	L4N1	79	n	d	n/a	n/a	r		n/a
	2019-11-07	KapRNAI	L4N1	80	n	s	n	n/a	n/a		n
	2019-11-07	KapRNAI	L4N1	81	n	s	n	n/a	n/a		n/a
	2019-11-07	KapRNAI	L4N1	82	n	s	n	n/a	n/a		n/a
	2019-11-07	KapRNAI	L4N1	83	n	s	n	n/a	n/a		n/a
	2019-11-07	KapRNAI	L4N1	84	n	d	n	n/a	r		n
	2019-11-07	KapRNAI	L4N1	85	n	s	n	n/a	n/a		n/a
	2019-11-07	KapRNAI	L4N1	86	n	s	n	n/a	n/a		n/a
	2019-11-07	KapRNAI	L4N1	87	n	s	n	n/a	n/a		n/a
	2019-11-07	KapRNAI	L4N1	88	n	d	n/a	n/a	a		n/a
	2019-11-07	KapRNAI	L4N1	89	n	s	d	y	n/a		n/a
	2019-11-07	KapRNAI	L4N1	90	n	d	n/a	n/a	a		n
	2019-11-07	KapRNAI	L4N1	91	n	s	n	n/a	n/a		n/a
	2019-11-07	KapRNAI	L4N1	92	n	s	n	n/a	n/a		n/a
	2019-11-07	KapRNAI	L4N1	93	n	s	n	n/a	n/a		n
	2019-11-07	KapRNAI	L4N1	94	n	s	n	n/a	n/a		n/a
	2019-11-07	KapRNAI	L4N1	95	n	s	n	n/a	n/a		n/a
	2019-11-07	KapRNAI	L4N1	96	n	s	n	n/a	n/a		n/a
	2019-11-07	KapRNAI	L4N1	97	n	s	n	n/a	n/a		n/a
	2019-11-07	KapRNAI	L4N1	98	n	s	n	n/a	n/a		n
	2019-11-07	KapRNAI	L4N1	99	n	s	n	n/a	n/a		n/a
	2019-11-07	KapRNAI	L4N1	100	n	s	n	n/a	n/a		n
	2019-11-07	KapRNAI	L4N1	101	n	s	n	n/a	n/a		n/a
	2019-11-07	KapRNAI	L4N1	102	n	a	n/a	n/a	r		n/a
	2019-11-07	KapRNAI	L4N1	103	n	s	n	n/a	n/a		n/a
	2019-11-07	KapRNAI	L4N1	104	n	a	n/a	n/a	r		y
	2019-11-07	KapRNAI	L4N1	105	n	s	n	n/a	n/a		n/a
	2019-11-07	KapRNAI	L4N1	106	n	s	n	n/a	n/a		n/a
	2019-11-07	KapRNAI	L4N1	107	n	s	a	n	n/a		n
	2019-11-07	KapRNAI	L4N1	108	y	s	d	y	n/a
	2019-11-07	KapRNAI	L4N1	109	n	s	n	n/a	n/a		n/a
	2019-11-07	KapRNAI	L4N1	110	n	s	n	n/a	n/a		n/a
	2019-11-07	KapRNAI	L4N1	111	n	a	n/a	n/a	a		n/a
	2019-11-07	KapRNAI	L4N1	112	n	a	n/a	n/a	a		n/a
	2019-11-07	KapRNAI	L4N1	113	y	a	n/a	n/a	a
	2019-11-07	KapRNAI	L4N1	114	n	s	n	n/a	n/a		n/a
	2019-11-07	KapRNAI	L4N1	115	n	s	a	n	n/a		n/a
	2019-11-07	KapRNAI	L4N1	116	n	s	n	n/a	n/a		n/a
	2019-11-07	KapRNAI	L4N1	117	n	s	n	n/a	n/a		n/a
	2019-11-07	KapRNAI	L4N1	118	n	a	n/a	n/a	r		n/a
	2019-11-07	KapRNAI	L4N1	119	y	s	n	n/a	n/a
	2019-11-07	KapRNAI	L4N1	120	n	s	n	n/a	n/a		n
	2019-11-07	KapRNAI	L4N1	121	n	s	n	n/a	n/a		n
	2019-11-07	KapRNAI	L4N1	122	n	s	a	y	n/a		n/a
	2019-11-07	KapRNAI	L4N1	123	n	s	n	n/a	n/a		n
	2019-11-07	KapRNAI	L4N1	124	n	s	n	n/a	n/a		n/a
	2019-11-07	KapRNAI	L4N1	125	n	a	n/a	n/a	a		n/a
	2019-11-07	KapRNAI	L4N1	126	n	s	n	n/a	n/a		n
	2019-11-07	KapRNAI	L4N1	127	n	s	n	n/a	n/a		n
	2019-11-07	KapRNAI	L4N1	128	n	s	n	n/a	n/a		n/a
	2019-11-07	KapRNAI	L4N1	129	n	s	n	n/a	n/a		n/a
	2019-11-07	KapRNAI	L4N1	130	n	s	n	n/a	n/a		n
	2019-11-07	KapRNAI	L4N1	131	n	s	d	n	n/a		n/a
	2019-11-07	KapRNAI	L4N1	132	y	s	n	n/a	n/a
	2019-11-07	KapRNAI	L4N1	133	y	s	n	n/a	n/a
	2019-11-07	KapRNAI	L4N1	134	n	s	a	n	n/a		n/a
	2019-11-07	KapRNAI	L4N1	135	n	a	n/a	n/a	a		n/a
	2019-11-07	KapRNAI	L4N1	136	n	a	n/a	n/a	r		n/a
	2019-11-07	KapRNAI	L4N1	137	n	a	n/a	n/a	a		n/a
	2019-11-07	KapRNAI	L4N1	138	n	s	n	n/a	n/a		n/a
	2019-11-07	KapRNAI	L4N1	139	n	s	n	n/a	n/a		n/a
	2019-11-07	KapRNAI	L4N1	140	n	s	n	n/a	n/a		n
	2019-11-07	KapRNAI	L4N1	141	n	s	n	n/a	n/a		n/a
	2019-11-07	KapRNAI	L4N1	142	y	s	n	n/a	n/a
	2019-11-07	KapRNAI	L4N1	143	n	s	n	n/a	n/a		n/a
	2019-11-07	KapRNAI	L4N1	144	y	s	n	n/a	n/a
	2019-11-07	KapRNAI	L4N1	145	n	s	n	n/a	n/a		n
	2019-11-07	KapRNAI	L4N1	146	n	s	n	n/a	n/a		n
	2019-11-07	KapRNAI	L4N1	147	n	s	n	n/a	n/a		n
	2019-11-07	KapRNAI	L4N1	148	n	s	n	n/a	n/a		y
	2019-11-07	KapRNAI	L4N1	149	n	s	n	n/a	n/a		n
	2019-11-07	KapRNAI	L4N1	150	n	s	n	n/a	n/a		n
	2019-11-07	KapRNAI	L4N1	151	n	s	n	n/a	n/a		n
	2019-11-07	KapRNAI	L4N1	152	n	s	n	n/a	n/a		n
	2019-11-07	KapRNAI	L4N1	153	n	s	n	n/a	n/a		n/a
	2019-11-07	KapRNAI	L4N1	154	n	s	n	n/a	n/a		n/a
	2019-11-07	KapRNAI	L4N1	155	n	s	n	n/a	n/a		n
	2019-11-07	KapRNAI	L4N1	156	n	s	n	n/a	n/a		n
	2019-11-07	KapRNAI	L4N1	157	n	s	n	n/a	n/a		n
	2019-11-07	KapRNAI	L4N1	158	n	s	n	n/a	n/a		n/a
	2019-11-07	KapRNAI	L4N1	159	n	s	n	n/a	n/a		n
	2019-11-07	KapRNAI	L4N1	160	n	s	n	n/a	n/a		n
	2019-11-07	KapRNAI	L4N1	161	n	s	n	n/a	n/a		n
	2019-11-07	KapRNAI	L4N1	162	n	s	n	n/a	n/a		n/a
	2019-11-07	KapRNAI	L4N1	163	n	s	n	n/a	n/a		n/a
	2019-11-07	KapRNAI	L4N1	164	n	a	n/a	n/a	a		n/a
	2019-11-07	KapRNAI	L4N1	165	n	a	n/a	n/a	r		n/a
	2019-11-07	KapRNAI	L4N1	166	n	s	n	n/a	n/a		n
	2019-11-07	KapRNAI	L4N1	167	n	a	n/a	n/a	r		n/a
	2019-11-07	KapRNAI	L4N1	168	n	s	n	n/a	n/a		n/a
	2019-11-07	KapRNAI	L4N1	169	n	s	n	n/a	n/a		n/a
	2019-11-07	KapRNAI	L4N1	170	n	s	n	n/a	n/a		n/a
	2019-11-07	KapRNAI	L4N1	171	n	s	n	n/a	n/a		n
	2019-11-07	KapRNAI	L4N1	172	n	s	n	n/a	n/a		n/a
	2019-11-07	KapRNAI	L4N1	173	n	s	a	y	n/a		n
	2019-11-07	KapRNAI	L4N1	174	n	s	n	n/a	n/a		n/a
	2019-11-07	KapRNAI	L4N1	175	n	s	n	n/a	n/a		n/a
	2019-11-07	KapRNAI	L4N1	176	n	s	n	n/a	n/a		n/a
	2019-11-07	KapRNAI	L4N1	177	n	s	n	n/a	n/a		n/a
	2019-11-07	KapRNAI	L4N1	178	n	s	n	n/a	n/a		n
	2019-11-07	KapRNAI	L4N1	179	n	s	n	n/a	n/a		n/a
	2019-11-07	KapRNAI	L4N1	180	n	s	n	n/a	n/a		n/a
	2019-11-07	KapRNAI	L4N1	181	n	s	n	n/a	n/a		n
	2019-11-07	KapRNAI	L4N1	182	n	s	n	n/a	n/a		n
	2019-11-07	KapRNAI	L4N1	183	n	s	n	n/a	n/a		n/a
	2019-11-07	KapRNAI	L4N1	184	n	s	n	n/a	n/a		n
	2019-11-07	KapRNAI	L4N1	185	n	s	n	n/a	n/a		n/a
	2019-11-07	KapRNAI	L4N1	186	n	s	n	n/a	n/a		n/a
	2019-11-07	KapRNAI	L4N1	187	n	s	n	n/a	n/a		n/a
	2019-11-07	KapRNAI	L4N1	188	n	s	n	n/a	n/a		n/a
	2019-11-07	KapRNAI	L4N1	189	n	s	n	n/a	n/a		n/a
	2019-11-07	KapRNAI	L4N1	190	n	s	n	n/a	n/a		n/a
	2019-11-07	KapRNAI	L4N1	191	n	s	n	n/a	n/a		n
	2019-11-07	KapRNAI	L4N1	192	n	s	n	n/a	n/a		n
	2019-11-07	KapRNAI	L4N1	193	n	s	n	n/a	n/a		n
	2019-11-07	KapRNAI	L4N1	194	n	s	d	n	n/a		n/a
	2019-11-07	KapRNAI	L4N1	195	n	s	n	n/a	n/a		n/a
	2019-11-07	KapRNAI	L4N1	196	n	s	n	n/a	n/a		n/a
	2019-11-07	KapRNAI	L4N1	197	n	s	n	n/a	n/a		n/a
	2019-11-07	KapRNAI	L4N1	198	n	s	n	n/a	n/a		n/a
	2019-11-07	KapRNAI	L4N1	199	n	s	n	n/a	n/a		n/a
	2019-11-07	KapRNAI	L4N1	200	n	s	n	n/a	n/a		n/a
	2019-11-07	KapRNAI	L4N1	201	n	s	n	n/a	n/a		n/a
	2019-11-07	KapRNAI	L4N1	202	n	s	n	n/a	n/a		n/a
	2019-11-07	KapRNAI	L4N1	203	n	s	n	n/a	n/a		n/a
	2019-11-07	KapRNAI	L4N1	204	n	s	n	n/a	n/a		n/a
	2019-11-07	KapRNAI	L4N1	205	n	s	n	n/a	n/a		n
	2019-11-07	KapRNAI	L4N1	206	n	s	n	n/a	n/a		n/a
	2019-11-07	KapRNAI	L4N1	207	n	s	n	n/a	n/a		n/a
	2019-11-07	KapRNAI	L4N1	208	n	s	n	n/a	n/a		n/a
	2019-11-07	KapRNAI	L4N1	209	n	s	n	n/a	n/a		n/a
	2019-11-07	KapRNAI	L4N1	210	n	s	n	n/a	n/a		n
	2019-11-07	KapRNAI	L4N1	211	n	a	n	n	r		n/a
	2019-11-07	KapRNAI	L4N1	212	n	s	n	n/a	n/a		n/a
	2019-11-07	KapRNAI	L4N1	213	n	a	n/a	n/a	a		n/a
	2019-11-07	KapRNAI	L4N1	214	n	s	n	n/a	n/a		n/a
	2019-11-07	KapRNAI	L4N1	215	n	s	n	n/a	n/a		n/a
	2019-11-07	KapRNAI	L4N1	216	n	s	n	n/a	n/a		n/a
	2019-11-07	KapRNAI	L4N1	217	n	s	n	n/a	n/a		n/a
	2019-11-07	KapRNAI	L4N1	218	n	s	n	n/a	n/a		n/a
	2019-11-07	KapRNAI	L4N1	219	y	a	n/a	n/a	a
	2019-11-07	KapRNAI	L4N1	220	n	a	n/a	n/a	a		n/a
	2019-11-07	KapRNAI	L4N1	221	n	a	n/a	n/a	a		n/a
	2019-11-07	KapRNAI	L4N1	222	n	s	n	n/a	n/a		n/a
	2019-11-07	KapRNAI	L4N1	223	n	a	n/a	n/a	a		n/a
	2019-11-07	KapRNAI	L4N1	224	n	a	n/a	n/a	a		n/a
	2019-11-07	KapRNAI	L4N1	225	n	a	n/a	n/a	a		n/a
	2019-11-07	KapRNAI	L4N1	226	n	a	n/a	n/a	a		n/a
	2019-11-07	KapRNAI	L4N1	227	n	a	n/a	n/a	a		n/a
	2019-11-07	KapRNAI	L4N1	228	n	s	n	n/a	n/a		n
	2019-11-07	KapRNAI	L4N1	229	n	s	n	n/a	n/a		n/a
	2019-11-07	KapRNAI	L4N1	230	n	s	n	n/a	n/a		n
	2019-11-07	KapRNAI	L4N1	231	n	s	n	n/a	n/a		n/a
	2019-11-07	KapRNAI	L4N1	232	n	s	n	n/a	n/a		n
	2019-11-07	KapRNAI	L4N1	233	n	s	n	n/a	n/a		n/a
	2019-11-07	KapRNAI	L4N1	234	n	s	n	n/a	n/a		n
	2019-11-07	KapRNAI	L4N1	235	n	s	n	n/a	n/a		n/a
	2019-11-07	KapRNAI	L4N1	236	n	s	n	n/a	n/a		n/a
	2019-11-07	KapRNAI	L4N1	237	n	s	n	n/a	n/a		n
	2019-11-07	KapRNAI	L4N1	238	n	s	n	n/a	n/a		n/a
	2019-11-07	KapRNAI	L4N1	239	n	s	n	n/a	n/a		n/a
	2019-11-07	KapRNAI	L4N1	240	n	s	n	n/a	n/a		n/a
	2019-11-07	KapRNAI	L4N1	241	n	s	n	n/a	n/a		n
	2019-11-07	KapRNAI	L4N1	242	n	s	a	y	n/a		n/a
	2019-11-07	KapRNAI	L4N1	243	n	s	n	n/a	n/a		n/a
	2019-11-07	KapRNAI	L4N1	244	n	s	a	y	n/a		n/a
	2019-11-07	KapRNAI	L4N1	245	n	s	n	n/a	n/a		n/a
	2019-11-07	KapRNAI	L4N1	246	n	s	n	n/a	n/a		n
	2019-11-07	KapRNAI	L4N1	247	n	s	n	n/a	n/a		n
	2019-11-07	KapRNAI	L4N1	248	n	s	n	n/a	n/a		n/a
	2019-11-07	KapRNAI	L4N1	249	n	s	n	n/a	n/a		n/a
	2019-11-07	KapRNAI	L4N1	250	n	s	n	n/a	n/a		n
	2019-11-07	KapRNAI	L4N1	251	n	s	n	n/a	n/a		n/a
	2019-11-07	KapRNAI	L4N1	252	n	s	n	n/a	n/a		n/a
	2019-11-07	KapRNAI	L4N1	253	n	s	n	n/a	n/a		n
	2019-11-07	KapRNAI	L4N1	254	n	s	n	n/a	n/a		n/a
	2019-11-07	KapRNAI	L4N1	255	n	s	n	n/a	n/a		n/a
	2019-11-07	KapRNAI	L4N1	256	n	s	n	n/a	n/a		n/a
	2019-11-07	KapRNAI	L4N1	257	n	s	n	n/a	n/a		n/a
	2019-11-07	KapRNAI	L4N1	258	n	s	n	n/a	n/a		n/a
	2019-11-07	KapRNAI	L4N1	259	n	d	n/a	n/a	r		n/a
	2019-11-07	KapRNAI	L4N1	260	n	s	d	y	n/a		n/a
	2019-11-07	KapRNAI	L4N1	261	n	s	n	n/a	n/a		n/a
	2019-11-07	KapRNAI	L4N1	262	n	s	n	n/a	n/a		n/a
	2019-11-07	KapRNAI	L4N1	263	n	s	n	n/a	n/a		n/a
	2019-11-07	KapRNAI	L4N1	264	n	s	n	n/a	n/a		n/a
	2019-11-07	KapRNAI	L4N1	265	n	s	n	n/a	n/a		n/a
	2019-11-07	KapRNAI	L4N1	266	n	s	n	n/a	n/a		n/a
	2019-11-07	KapRNAI	L4N1	267	n	s	n	n/a	n/a		n/a
	2019-11-07	KapRNAI	L4N1	268	n	a	n/a	n/a	a		n/a
	2019-11-07	KapRNAI	L4N1	269	n	s	n	n/a	n/a		n/a
	2019-11-07	KapRNAI	L4N1	270	n	a	n/a	n/a	a		n/a
	2019-11-07	KapRNAI	L4N1	271	n	s	n	n/a	n/a		n/a
	2019-11-07	KapRNAI	L4N1	272	n	s	n	n/a	n/a		n/a
	2019-11-07	KapRNAI	L4N1	273	n	s	n	n/a	n/a		n/a
	2019-11-07	KapRNAI	L4N1	274	n	s	d	y	n/a		n/a
	2019-11-07	KapRNAI	L4N1	275	n	s	d	y	n/a		n/a
	2019-11-07	KapRNAI	L4N1	276	n	s	d	n	n/a		n
	2019-11-07	KapRNAI	L4N1	277	n	s	n	n/a	n/a		n/a
	2019-11-07	KapRNAI	L4N1	278	n	s	n	n/a	n/a		n/a
	2019-11-07	KapRNAI	L4N1	279	n	s	n	n/a	n/a		n/a
	2019-11-07	KapRNAI	L4N1	280	n	s	n	n/a	n/a		n
	2019-11-07	KapRNAI	L4N1	281	n	s	n	n/a	n/a		n/a

## Sheet: L1N2_8 11 19
	date	RNAi	movie name	comet number	in first frame	origin (soma, dendrite,axon)	approach axon/dendrite/no	enter axon/dendrite	polarity	angle of comet from axon	Turning events
	2019-11-08	KapRNAI	L1N2	1	Y	a	n/a	n/a	a
	2019-11-08	KapRNAI	L1N2	2	Y	a	n/a	n/a	a
	2019-11-08	KapRNAI	L1N2	3	Y	a	n/a	n/a	a
	2019-11-08	KapRNAI	L1N2	4	Y	a	n/a	n/a	a
	2019-11-08	KapRNAI	L1N2	5	Y	s	n	n/a	n/a
	2019-11-08	KapRNAI	L1N2	6	Y	s	n	n/a	n/a
	2019-11-08	KapRNAI	L1N2	7	Y	s	n	n/a	n/a
	2019-11-08	KapRNAI	L1N2	8	Y	s	n	n/a	n/a
	2019-11-08	KapRNAI	L1N2	9	Y	s	n	n/a	n/a
	2019-11-08	KapRNAI	L1N2	10	Y	s	n	n/a	n/a
	2019-11-08	KapRNAI	L1N2	11	Y	d	n/a	n/a	a
	2019-11-08	KapRNAI	L1N2	12	Y	d	n/a	n/a	a
	2019-11-08	KapRNAI	L1N2	13	Y	d	n/a	n/a	a
	2019-11-08	KapRNAI	L1N2	14	Y	d	n/a	n/a	a
	2019-11-08	KapRNAI	L1N2	15	Y	s	n	n/a	n/a
	2019-11-08	KapRNAI	L1N2	16	Y	d	n/a	n/a	r
	2019-11-08	KapRNAI	L1N2	17	n	s	n	n/a	n/a		n/a
	2019-11-08	KapRNAI	L1N2	18	n	s	n	n/a	n/a		n/a
	2019-11-08	KapRNAI	L1N2	19	n	s	n	n/a	n/a		n
	2019-11-08	KapRNAI	L1N2	20	Y	s	n	n/a	n/a
	2019-11-08	KapRNAI	L1N2	21	n	d	n/a	n/a	r		n/a
	2019-11-08	KapRNAI	L1N2	22	n	a	n/a	n/a	a		n/a
	2019-11-08	KapRNAI	L1N2	23	n	a	n/a	n/a	a		n/a
	2019-11-08	KapRNAI	L1N2	24	n	s	n	n/a	n/a		n/a
	2019-11-08	KapRNAI	L1N2	25	n	s	n	n/a	n/a		n/a
	2019-11-08	KapRNAI	L1N2	26	n	a	n/a	n/a	a		n/a
	2019-11-08	KapRNAI	L1N2	27	n	s	n	n/a	n/a		n
	2019-11-08	KapRNAI	L1N2	28	n	s	a	y	n/a		n/a
	2019-11-08	KapRNAI	L1N2	29	n	s	n	n/a	n/a		n/a
	2019-11-08	KapRNAI	L1N2	30	n	s	n	n/a	n/a		n
	2019-11-08	KapRNAI	L1N2	31	n	s	n	n/a	n/a		n
	2019-11-08	KapRNAI	L1N2	32	n	s	d	y	n/a		n/a
	2019-11-08	KapRNAI	L1N2	33	n	d	n/a	n/a	a		n/a
	2019-11-08	KapRNAI	L1N2	34	n	d	n/a	n/a	r		n/a
	2019-11-08	KapRNAI	L1N2	35	n	s	a	y	n/a		n/a
	2019-11-08	KapRNAI	L1N2	36	n	s	n	n/a	n/a		n/a
	2019-11-08	KapRNAI	L1N2	37	n	s	n	n/a	n/a		n
	2019-11-08	KapRNAI	L1N2	38	n	d	n/a	n/a	a		n/a
	2019-11-08	KapRNAI	L1N2	39	n	s	n	n/a	n/a		n/a
	2019-11-08	KapRNAI	L1N2	40	n	s	n	n/a	n/a		n
	2019-11-08	KapRNAI	L1N2	41	n	s	n	n/a	n/a		n
	2019-11-08	KapRNAI	L1N2	42	n	s	n	n/a	n/a		n/a
	2019-11-08	KapRNAI	L1N2	43	n	s	n	n/a	n/a		n
	2019-11-08	KapRNAI	L1N2	44	n	a	n/a	n/a	a		n/a
	2019-11-08	KapRNAI	L1N2	45	n	s	a	y	n/a		n
	2019-11-08	KapRNAI	L1N2	46	Y	s	d	n	n/a
	2019-11-08	KapRNAI	L1N2	47	n	d	n/a	n/a	r		n/a
	2019-11-08	KapRNAI	L1N2	48	n	d	n/a	n/a	a		n/a
	2019-11-08	KapRNAI	L1N2	49	n	d	n/a	n/a	a		n/a
	2019-11-08	KapRNAI	L1N2	50	n	d	n/a	n/a	a		n/a
	2019-11-08	KapRNAI	L1N2	51	n	s	d	y	n/a		n
	2019-11-08	KapRNAI	L1N2	52	n	d	n/a	n/a	a		n/a
	2019-11-08	KapRNAI	L1N2	53	n	s	d	n	n/a		n
	2019-11-08	KapRNAI	L1N2	54	n	d	n/a	n/a	a		n/a
	2019-11-08	KapRNAI	L1N2	55	n	d	n/a	n/a	r		n/a
	2019-11-08	KapRNAI	L1N2	56	n	d	n/a	n/a	a		n/a
	2019-11-08	KapRNAI	L1N2	57	n	d	n/a	n/a	a		n/a
	2019-11-08	KapRNAI	L1N2	58	n	s	a	y	n/a		n/a
	2019-11-08	KapRNAI	L1N2	59	n	a	n/a	n/a	a		n/a
	2019-11-08	KapRNAI	L1N2	60	n	a	n/a	n/a	a		n/a
	2019-11-08	KapRNAI	L1N2	61	n	s	a	y	n/a		n/a
	2019-11-08	KapRNAI	L1N2	62	n	a	n/a	n/a	a		n/a
	2019-11-08	KapRNAI	L1N2	63	n	s	n	n/a	n/a		n/a
	2019-11-08	KapRNAI	L1N2	64	n	s	n	n/a	n/a		n
	2019-11-08	KapRNAI	L1N2	65	n	s	n	n/a	n/a		n
	2019-11-08	KapRNAI	L1N2	66	n	s	n	n/a	n/a		y
	2019-11-08	KapRNAI	L1N2	67	n	s	n	n/a	n/a		n
	2019-11-08	KapRNAI	L1N2	68	n	s	n	n/a	n/a		n
	2019-11-08	KapRNAI	L1N2	69	n	s	n	n/a	n/a		n/a
	2019-11-08	KapRNAI	L1N2	70	n	s	n	n/a	n/a		n/a
	2019-11-08	KapRNAI	L1N2	71	n	s	n	n/a	n/a		n/a
	2019-11-08	KapRNAI	L1N2	72	n	s	n	n/a	n/a		n/a
	2019-11-08	KapRNAI	L1N2	73	n	s	n	n/a	n/a		n/a
	2019-11-08	KapRNAI	L1N2	74	n	s	n	n/a	n/a		n/a
	2019-11-08	KapRNAI	L1N2	75	n	s	n	n/a	n/a		n/a
	2019-11-08	KapRNAI	L1N2	76	n	s	n	n/a	n/a		n/a
	2019-11-08	KapRNAI	L1N2	77	n	s	n	n/a	n/a		n
	2019-11-08	KapRNAI	L1N2	78	n	s	n	n/a	n/a		n
	2019-11-08	KapRNAI	L1N2	79	n	s	n	n/a	n/a		n/a
	2019-11-08	KapRNAI	L1N2	80	n	s	n	n/a	n/a		n
	2019-11-08	KapRNAI	L1N2	81	n	s	n	n/a	n/a		n
	2019-11-08	KapRNAI	L1N2	82	n	s	n	n/a	n/a		n
	2019-11-08	KapRNAI	L1N2	83	n	s	n	n/a	n/a		n
	2019-11-08	KapRNAI	L1N2	84	n	s	n	n/a	n/a		n
	2019-11-08	KapRNAI	L1N2	85	n	s	n	n/a	n/a		n/a
	2019-11-08	KapRNAI	L1N2	86	n	s	n	n/a	n/a		n

## Sheet: L4N1_9 11 19
	date	RNAi	movie name	comet number	in first frame	origin (soma, dendrite,axon)	approach axon/dendrite/no	enter axon/dendrite	polarity	angle of comet from axon	Turning events
	2019-11-09	KapRNAI	L4N1	1	Y	s	n	n/a	n/a
	2019-11-09	KapRNAI	L4N1	2	n	s	n	n/a	n/a		n
	2019-11-09	KapRNAI	L4N1	3	n	s	n	n/a	n/a		n/a
	2019-11-09	KapRNAI	L4N1	4	Y	s	n	n/a	n/a
	2019-11-09	KapRNAI	L4N1	5	n	s	n	n/a	n/a		n
	2019-11-09	KapRNAI	L4N1	6	n	s	n	n/a	n/a		n/a
	2019-11-09	KapRNAI	L4N1	7	n	a	n/a	n/a	a		n/a
	2019-11-09	KapRNAI	L4N1	8	n	a	n/a	n/a	a		n/a
	2019-11-09	KapRNAI	L4N1	9	n	a	n/a	n/a	a		n/a
	2019-11-09	KapRNAI	L4N1	10	n	a	n/a	n/a	a		n/a
	2019-11-09	KapRNAI	L4N1	11	n	a	n/a	n/a	a		n/a
	2019-11-09	KapRNAI	L4N1	12	n	a	n/a	n/a	a		n/a
	2019-11-09	KapRNAI	L4N1	13	n	s	a	y	n/a		n/a
	2019-11-09	KapRNAI	L4N1	14	n	s	a	y	n/a		y
	2019-11-09	KapRNAI	L4N1	15	n	s	a	y	n/a		n/a
	2019-11-09	KapRNAI	L4N1	16	n	s	a	y	n/a		n/a
	2019-11-09	KapRNAI	L4N1	17	n	s	n	n/a	n/a		n/a
	2019-11-09	KapRNAI	L4N1	18	n	a	n/a	n/a	a		n/a
	2019-11-09	KapRNAI	L4N1	19	n	a	n/a	n/a	a		n/a
	2019-11-09	KapRNAI	L4N1	20	n	a	n/a	n/a	a		n/a
	2019-11-09	KapRNAI	L4N1	21	n	s	a	y	n/a		n/a
	2019-11-09	KapRNAI	L4N1	22	n	s	a	y	n/a		n/a
	2019-11-09	KapRNAI	L4N1	23	n	s	a	y	n/a		n
	2019-11-09	KapRNAI	L4N1	24	n	s	a	y	n/a		n/a
	2019-11-09	KapRNAI	L4N1	25	n	s	n	n/a	n/a		n
	2019-11-09	KapRNAI	L4N1	26	n	s	a	n	n/a		n/a
	2019-11-09	KapRNAI	L4N1	27	n	s	n	n/a	n/a		n/a
	2019-11-09	KapRNAI	L4N1	28	n	a	n/a	n/a	a		n/a
	2019-11-09	KapRNAI	L4N1	29	n	s	a	y	n/a		n/a
	2019-11-09	KapRNAI	L4N1	30	n	s	a	y	n/a		n/a
	2019-11-09	KapRNAI	L4N1	31	n	a	n/a	n/a	a		n/a
	2019-11-09	KapRNAI	L4N1	32	n	a	n/a	n/a	a		n/a
	2019-11-09	KapRNAI	L4N1	33	n	s	n	n/a	n/a		n/a
	2019-11-09	KapRNAI	L4N1	34	n	a	n/a	n/a	a		n/a
	2019-11-09	KapRNAI	L4N1	35	n	a	n/a	n/a	a		n/a
	2019-11-09	KapRNAI	L4N1	36	n	a	n/a	n/a	a		n/a
	2019-11-09	KapRNAI	L4N1	37	n	s	n	n/a	n/a		n/a
	2019-11-09	KapRNAI	L4N1	38	n	s	n	n/a	n/a		n
	2019-11-09	KapRNAI	L4N1	39	n	a	n/a	n/a	a		n/a
	2019-11-09	KapRNAI	L4N1	40	n	a	n/a	n/a	a		n/a
	2019-11-09	KapRNAI	L4N1	41	n	s	a	n	n/a		n/a
	2019-11-09	KapRNAI	L4N1	42	n	s	a	y	n/a		n/a
	2019-11-09	KapRNAI	L4N1	43	n	s	n	n/a	n/a		n/a
	2019-11-09	KapRNAI	L4N1	44	y	s	n	n/a	n/a
	2019-11-09	KapRNAI	L4N1	45	y	s	n	n/a	n/a
	2019-11-09	KapRNAI	L4N1	46	y	d	n/a	n/a	r
	2019-11-09	KapRNAI	L4N1	47	n	s	n	n/a	n/a		n/a
	2019-11-09	KapRNAI	L4N1	48	n	s	n	n/a	n/a		n/a
	2019-11-09	KapRNAI	L4N1	49	y	s	n	n/a	n/a
	2019-11-09	KapRNAI	L4N1	50	n	s	n	n/a	n/a		n
	2019-11-09	KapRNAI	L4N1	51	n	s	n	n/a	n/a		n
	2019-11-09	KapRNAI	L4N1	52	y	s	n	n/a	n/a
	2019-11-09	KapRNAI	L4N1	53	n	d	n/a	n/a	r		n/a
	2019-11-09	KapRNAI	L4N1	54	n	d	n/a	n/a	r		n/a
	2019-11-09	KapRNAI	L4N1	55	n	s	n	n/a	n/a		n/a
	2019-11-09	KapRNAI	L4N1	56	n	d	n/a	n/a	a		n/a
	2019-11-09	KapRNAI	L4N1	57	n	s	d	y	n/a		n/a
	2019-11-09	KapRNAI	L4N1	58	n	d	n/a	n/a	r		n
	2019-11-09	KapRNAI	L4N1	59	n	s	n	n/a	n/a		n
	2019-11-09	KapRNAI	L4N1	60	n	s	n	n/a	n/a		n/a
	2019-11-09	KapRNAI	L4N1	61	n	s	n	n/a	n/a		n/a
	2019-11-09	KapRNAI	L4N1	62	n	s	d	y	n/a		n/a
	2019-11-09	KapRNAI	L4N1	63	n	s	n	n/a	n/a		n/a
	2019-11-09	KapRNAI	L4N1	64	n	s	n	n/a	n/a		n/a
	2019-11-09	KapRNAI	L4N1	65	n	s	n	n/a	n/a		n/a
	2019-11-09	KapRNAI	L4N1	66	n	s	n	n/a	n/a		n
	2019-11-09	KapRNAI	L4N1	67	n	s	n	n/a	n/a		n
	2019-11-09	KapRNAI	L4N1	68	n	s	n	n/a	n/a		n/a
	2019-11-09	KapRNAI	L4N1	69	n	s	n	n/a	n/a		n/a
	2019-11-09	KapRNAI	L4N1	70	n	s	n	n/a	n/a		n/a
	2019-11-09	KapRNAI	L4N1	71	n	s	n	n/a	n/a		n/a
	2019-11-09	KapRNAI	L4N1	72	n	s	n	n/a	n/a		n/a
	2019-11-09	KapRNAI	L4N1	73	n	s	n	n/a	n/a		n/a
	2019-11-09	KapRNAI	L4N1	74	n	s	n	n/a	n/a		n
	2019-11-09	KapRNAI	L4N1	75	n	s	d	n	n/a		n
	2019-11-09	KapRNAI	L4N1	76	n	s	d	n	n/a		n
	2019-11-09	KapRNAI	L4N1	77	n	s	n	n/a	n/a		n/a
	2019-11-09	KapRNAI	L4N1	78	n	d	n/a	n/a	r		n/a
	2019-11-09	KapRNAI	L4N1	79	n	s	d	n	n/a		n
	2019-11-09	KapRNAI	L4N1	80	n	s	d	y	n/a		n/a
	2019-11-09	KapRNAI	L4N1	81	n	s	d	n	n/a		n/a
	2019-11-09	KapRNAI	L4N1	82	n	s	n	n/a	n/a		n
	2019-11-09	KapRNAI	L4N1	83	n	s	n	n/a	n/a		n
	2019-11-09	KapRNAI	L4N1	84	n	s	n	n/a	n/a		n
	2019-11-09	KapRNAI	L4N1	85	n	s	n	n/a	n/a		n/a
	2019-11-09	KapRNAI	L4N1	86	n	s	n	n/a	n/a		n/a
	2019-11-09	KapRNAI	L4N1	87	n	d	n/a	n/a	a		n/a
	2019-11-09	KapRNAI	L4N1	88	n	d	n/a	n/a	r		n/a
	2019-11-09	KapRNAI	L4N1	89	n	d	n/a	n/a	r		n
	2019-11-09	KapRNAI	L4N1	90	n	s	n	n/a	n/a		n/a
	2019-11-09	KapRNAI	L4N1	91	n	s	n	n/a	n/a		n
	2019-11-09	KapRNAI	L4N1	92	n	s	n	n/a	n/a		n/a
	2019-11-09	KapRNAI	L4N1	93	n	d	n/a	n/a	r		n
	2019-11-09	KapRNAI	L4N1	94	n	d	n/a	n/a	r		n/a
	2019-11-09	KapRNAI	L4N1	95	n	s	n	n/a	n/a		n/a

## Sheet: L3N1_9 11 19
	date	RNAi	movie name	comet number	in first frame	origin (soma, dendrite,axon)	approach axon/dendrite/no	enter axon/dendrite	polarity	angle of comet from axon	Turning events
	2019-11-09	KapRNAI	L3N1	1	y	s	n	na	na
	2019-11-09	KapRNAI	L3N1	2	y	s	d	y	na
	2019-11-09	KapRNAI	L3N1	3	y	s	n	na	na
	2019-11-09	KapRNAI	L3N1	4	y	s	n	na	na
	2019-11-09	KapRNAI	L3N1	5	y	s	d	n	na
	2019-11-09	KapRNAI	L3N1	6	y	s	n	na	na
	2019-11-09	KapRNAI	L3N1	7	y	a	na	na	r
	2019-11-09	KapRNAI	L3N1	8	y	s	n	na	na
	2019-11-09	KapRNAI	L3N1	9	y	s	n	na	na
	2019-11-09	KapRNAI	L3N1	10	n	d	na	na	a		n/a
	2019-11-09	KapRNAI	L3N1	11	n	s	d	n	na		n/a
	2019-11-09	KapRNAI	L3N1	12	n	a	na	na	a		n/a
	2019-11-09	KapRNAI	L3N1	13	y	s	n	na	na
	2019-11-09	KapRNAI	L3N1	14	y	s	n	na	na
	2019-11-09	KapRNAI	L3N1	15	y	s	n	na	na
	2019-11-09	KapRNAI	L3N1	16	n	s	n	na	na		n/a
	2019-11-09	KapRNAI	L3N1	17	y	s	a	n	na
	2019-11-09	KapRNAI	L3N1	18	n	s	d	n	na		n/a
	2019-11-09	KapRNAI	L3N1	19	n	s	n	na	na		n/a
	2019-11-09	KapRNAI	L3N1	20	y	d	na	na	r
	2019-11-09	KapRNAI	L3N1	21	n	d	na	na	r		n/a
	2019-11-09	KapRNAI	L3N1	22	y	d	na	na	a
	2019-11-09	KapRNAI	L3N1	23	n	s	n	na	na		n/a
	2019-11-09	KapRNAI	L3N1	24	y	d	na	na	r
	2019-11-09	KapRNAI	L3N1	25	n	d	na	na	a		n/a
	2019-11-09	KapRNAI	L3N1	26	y	d	na	na	a
	2019-11-09	KapRNAI	L3N1	27	y	s	n	na	na
	2019-11-09	KapRNAI	L3N1	28	n	d	na	na	r		n/a
	2019-11-09	KapRNAI	L3N1	29	n	s	d	y	na		n/a
	2019-11-09	KapRNAI	L3N1	30	n	d	na	na	r		n
	2019-11-09	KapRNAI	L3N1	31	y	s	n	na	na
	2019-11-09	KapRNAI	L3N1	32	n	d	na	na	r		n/a
	2019-11-09	KapRNAI	L3N1	33	n	d	na	na	r		n/a
	2019-11-09	KapRNAI	L3N1	34	n	d	na	na	r		n
	2019-11-09	KapRNAI	L3N1	35	n	d	na	na	r		n/a
	2019-11-09	KapRNAI	L3N1	36	n	d	na	na	r		n/a
	2019-11-09	KapRNAI	L3N1	37	n	s	n	na	na		n
	2019-11-09	KapRNAI	L3N1	38	n	d	na	na	r		y
	2019-11-09	KapRNAI	L3N1	39	n	d	na	na	r		n/a
	2019-11-09	KapRNAI	L3N1	40	n	d	na	na	r		n/a
	2019-11-09	KapRNAI	L3N1	41	n	a	na	na	a		n/a
	2019-11-09	KapRNAI	L3N1	42	n	a	na	na	a		n/a
	2019-11-09	KapRNAI	L3N1	43	n	a	na	na	a		n/a
	2019-11-09	KapRNAI	L3N1	44	n	s	a	y	na		n
	2019-11-09	KapRNAI	L3N1	45	n	s	a	y	na		n/a
	2019-11-09	KapRNAI	L3N1	46	n	d	na	na	a		n/a
	2019-11-09	KapRNAI	L3N1	47	n	d	na	na	a		n/a
	2019-11-09	KapRNAI	L3N1	48	n	s	d	n	na		n/a
	2019-11-09	KapRNAI	L3N1	49	n	d	na	na	a		n/a
	2019-11-09	KapRNAI	L3N1	50	n	s	n	na	na		n/a
	2019-11-09	KapRNAI	L3N1	51	n	d	na	na	a		n/a
	2019-11-09	KapRNAI	L3N1	52	n	s	n	na	na		n/a
	2019-11-09	KapRNAI	L3N1	53	n	d	na	na	r		n/a
	2019-11-09	KapRNAI	L3N1	54	n	d	na	na	a		n/a
	2019-11-09	KapRNAI	L3N1	55	n	s	d	y	na		n
	2019-11-09	KapRNAI	L3N1	56	n	s	n	na	na		n/a
	2019-11-09	KapRNAI	L3N1	57	n	s	n	na	na		n/a
	2019-11-09	KapRNAI	L3N1	58	n	d	na	na	r		n/a
	2019-11-09	KapRNAI	L3N1	59	n	s	n	na	na		n
	2019-11-09	KapRNAI	L3N1	60	n	s	d	y	na		n
	2019-11-09	KapRNAI	L3N1	61	y	s	d	y	na
	2019-11-09	KapRNAI	L3N1	62	n	d	na	na	r		n/a
	2019-11-09	KapRNAI	L3N1	63	n	s	d	y	na		n/a
	2019-11-09	KapRNAI	L3N1	64	n	s	n	na	na		n/a
	2019-11-09	KapRNAI	L3N1	65	n	s	d	y	na		n/a
	2019-11-09	KapRNAI	L3N1	66	n	d	na	na	a		n/a
	2019-11-09	KapRNAI	L3N1	67	n	d	na	na	a		n/a
	2019-11-09	KapRNAI	L3N1	68	n	d	na	na	a		n/a
	2019-11-09	KapRNAI	L3N1	69	n	d	na	na	a		n/a
	2019-11-09	KapRNAI	L3N1	70	n	d	na	na	a		n/a
	2019-11-09	KapRNAI	L3N1	71	n	d	na	na	a		n/a
	2019-11-09	KapRNAI	L3N1	72	n	s	d	y	na		n/a
	2019-11-09	KapRNAI	L3N1	73	n	s	n	na	na		n/a
	2019-11-09	KapRNAI	L3N1	74	n	d	na	na	a		n/a
	2019-11-09	KapRNAI	L3N1	75	runs into end of movie						n/a
	2019-11-09	KapRNAI	L3N1	76	n	s	n	na	na		n/a
	2019-11-09	KapRNAI	L3N1	77	n	s	d	n	na		n/a
	2019-11-09	KapRNAI	L3N1	78	n	s	n	na	na		n/a
	2019-11-09	KapRNAI	L3N1	79	n	s	d	n	na		n/a
	2019-11-09	KapRNAI	L3N1	80	n	s	n	na	na		n/a
	2019-11-09	KapRNAI	L3N1	81	n	s	d	n	na		n/a
	2019-11-09	KapRNAI	L3N1	82	n	s	d	n	na		n/a
	2019-11-09	KapRNAI	L3N1	83	n	d	na	na	a		n/a
	2019-11-09	KapRNAI	L3N1	84	n	s	d	y	na		n/a
	2019-11-09	KapRNAI	L3N1	85	n	s	n	na	na		n/a
	2019-11-09	KapRNAI	L3N1	86	n	s	n	na	na		n
	2019-11-09	KapRNAI	L3N1	87	n	s	d	y	na		n/a
	2019-11-09	KapRNAI	L3N1	88	n	s	d	y	na		n/a
	2019-11-09	KapRNAI	L3N1	89	n	s	n	na	na		n
	2019-11-09	KapRNAI	L3N1	90	n	s	n	na	na		n
	2019-11-09	KapRNAI	L3N1	91	n	s	n	na	na		n/a
	2019-11-09	KapRNAI	L3N1	92	n	s	n	na	na		n
	2019-11-09	KapRNAI	L3N1	93	n	s	n	na	na		n/a
	2019-11-09	KapRNAI	L3N1	94	n	s	d	y	na		n/a
	2019-11-09	KapRNAI	L3N1	95	n	s	n	na	na		n/a
	2019-11-09	KapRNAI	L3N1	96	n	s	n	na	na		n/a
	2019-11-09	KapRNAI	L3N1	97	n	s	n	na	na		y
	2019-11-09	KapRNAI	L3N1	98	n	s	n	na	na		n/a
	2019-11-09	KapRNAI	L3N1	99	n	s	n	na	na		n/a
	2019-11-09	KapRNAI	L3N1	100	n	s	n	na	na		n
	2019-11-09	KapRNAI	L3N1	101	y	s	n	na	na
	2019-11-09	KapRNAI	L3N1	102	n	s	n	na	na		n/a
	2019-11-09	KapRNAI	L3N1	103	n	s	n	na	na		n/a
	2019-11-09	KapRNAI	L3N1	104	n	s	n	na	na		n/a
	2019-11-09	KapRNAI	L3N1	105	n	s	n	na	na		n
	2019-11-09	KapRNAI	L3N1	106	n	s	n	na	na		n
	2019-11-09	KapRNAI	L3N1	107	n	s	n	na	na		n
	2019-11-09	KapRNAI	L3N1	108	n	s	a	n	na		n
	2019-11-09	KapRNAI	L3N1	109	n	s	n	na	na		n
	2019-11-09	KapRNAI	L3N1	110	n	s	n	na	na		n/a
	2019-11-09	KapRNAI	L3N1	111	n	s	n	na	na		n/a
	2019-11-09	KapRNAI	L3N1	112	n	s	n	na	na		n/a
	2019-11-09	KapRNAI	L3N1	113	n	s	n	na	na		n/a
	2019-11-09	KapRNAI	L3N1	114	n	s	n	na	na		n/a
	2019-11-09	KapRNAI	L3N1	115	n	s	n	na	na		n
	2019-11-09	KapRNAI	L3N1	116	n	s	n	na	na		n/a
	2019-11-09	KapRNAI	L3N1	117	n	s	n	na	na		n/a
	2019-11-09	KapRNAI	L3N1	118	n	s	n	na	na		n
	2019-11-09	KapRNAI	L3N1	119	n	d	na	na	r		n/a
	2019-11-09	KapRNAI	L3N1	120	n	d	na	na	r		n/a
	2019-11-09	KapRNAI	L3N1	121	n	s	n	na	na		n/a
	2019-11-09	KapRNAI	L3N1	122	n	s	n	na	na		n/a
	2019-11-09	KapRNAI	L3N1	123	n	s	n	na	na		n/a
	2019-11-09	KapRNAI	L3N1	124	n	s	n	na	na		n/a
	2019-11-09	KapRNAI	L3N1	125	n	s	n	na	na		n
	2019-11-09	KapRNAI	L3N1	126	n	s	n	na	na		n
	2019-11-09	KapRNAI	L3N1	127	n	s	n	na	na		n/a
	2019-11-09	KapRNAI	L3N1	128	n	s	n	na	na		n/a
	2019-11-09	KapRNAI	L3N1	130	n	s	n	na	na		n
	2019-11-09	KapRNAI	L3N1	131	n	s	n	na	na		n
	2019-11-09	KapRNAI	L3N1	132	y	s	n	na	na
	2019-11-09	KapRNAI	L3N1	133	n	s	d	y	na		n/a
	2019-11-09	KapRNAI	L3N1	134	n	s	n	na	na		n
	2019-11-09	KapRNAI	L3N1	135	n	s	n	na	na		n/a
	2019-11-09	KapRNAI	L3N1	136	n	s	n	na	na		n
	2019-11-09	KapRNAI	L3N1	137	n	s	n	na	na		n/a
	2019-11-09	KapRNAI	L3N1	138	n	s	n	na	na		n/a
	2019-11-09	KapRNAI	L3N1	139	n	s	n	na	na		n/a
	2019-11-09	KapRNAI	L3N1	140	n	s	n	na	na		n/a
	2019-11-09	KapRNAI	L3N1	141	n	s	n	na	na		n
	2019-11-09	KapRNAI	L3N1	142	n	s	n	na	na		n/a
	2019-11-09	KapRNAI	L3N1	143	n	s	n	na	na		n/a
	2019-11-09	KapRNAI	L3N1	144	n	s	n	na	na		n/a
	2019-11-09	KapRNAI	L3N1	145	n	s	n	na	na		n
	2019-11-09	KapRNAI	L3N1	146	n	s	n	na	na		y
	2019-11-09	KapRNAI	L3N1	147	n	s	n	na	na		n
	2019-11-09	KapRNAI	L3N1	148	n	s	n	na	na		n/a
	2019-11-09	KapRNAI	L3N1	149	n	s	n	na	na		n/a
	2019-11-09	KapRNAI	L3N1	150	n	s	n	na	na		n/a
	2019-11-09	KapRNAI	L3N1	151	n	s	n	na	na		n/a
	2019-11-09	KapRNAI	L3N1	152	n	s	n	na	na		n/a
	2019-11-09	KapRNAI	L3N1	153	n	s	n	na	na		n/a
	2019-11-09	KapRNAI	L3N1	154	n	s	n	na	na		n/a
	2019-11-09	KapRNAI	L3N1	155	n	a	na	na	a		n/a
	2019-11-09	KapRNAI	L3N1	156	n	s	a	n	na		n/a
	2019-11-09	KapRNAI	L3N1	157	n	a	na	na	a		n/a
	2019-11-09	KapRNAI	L3N1	158	n	a	na	na	a		n/a
	2019-11-09	KapRNAI	L3N1	159	n	s	n	na	na		n/a
	2019-11-09	KapRNAI	L3N1	160	n	s	a	n	na		n/a
	2019-11-09	KapRNAI	L3N1	161	n	s	n	na	na		n/a
	2019-11-09	KapRNAI	L3N1	162	n	s	n	na	na		n
	2019-11-09	KapRNAI	L3N1	163	n	s	n	na	na		n/a
	2019-11-09	KapRNAI	L3N1	164	n	s	n	na	na		n/a
	2019-11-09	KapRNAI	L3N1	165	n	s	a	n	na		n/a
	2019-11-09	KapRNAI	L3N1	166	y	a	na	na	a
	2019-11-09	KapRNAI	L3N1	167	n	s	a	n	na		n
	2019-11-09	KapRNAI	L3N1	168	n	s	n	na	na		n/a
	2019-11-09	KapRNAI	L3N1	169	n	s	n	na	na		n/a
	2019-11-09	KapRNAI	L3N1	170	n	s	n	na	na		n
	2019-11-09	KapRNAI	L3N1	171	n	s	n	na	na		n/a
	2019-11-09	KapRNAI	L3N1	172	n	s	n	na	na		n/a
	2019-11-09	KapRNAI	L3N1	173	n	s	n	na	na		n/a
	2019-11-09	KapRNAI	L3N1	174	n	s	n	na	na		n/a
	2019-11-09	KapRNAI	L3N1	175	n	s	n	na	na		n/a
	2019-11-09	KapRNAI	L3N1	176	n	d	na	na	r		n/a
	2019-11-09	KapRNAI	L3N1	177	n	d	na	na	r		n/a
	2019-11-09	KapRNAI	L3N1	178	n	s	n	na	na		n/a
	2019-11-09	KapRNAI	L3N1	179	n	s	n	na	na		n
	2019-11-09	KapRNAI	L3N1	180	n	s	n	na	na		n/a
	2019-11-09	KapRNAI	L3N1	181	n	s	n	na	na		n/a
	2019-11-09	KapRNAI	L3N1	182	n	s	n	na	na		n/a
	2019-11-09	KapRNAI	L3N1	183	n	s	n	na	na		n/a
	2019-11-09	KapRNAI	L3N1	184	n	s	a	n	na		n
	2019-11-09	KapRNAI	L3N1	185	runs into end of movie						n/a
	2019-11-09	KapRNAI	L3N1	186	n	s	n	na	na		n/a
	2019-11-09	KapRNAI	L3N1	187	n	s	n	na	na		n
	2019-11-09	KapRNAI	L3N1	188	n	s	n	na	na		n/a
	2019-11-09	KapRNAI	L3N1	189	n	s	n	na	na		n/a
	2019-11-09	KapRNAI	L3N1	190	n	s	n	na	na		n/a
	2019-11-09	KapRNAI	L3N1	191	n	s	n	na	na		n/a
	2019-11-09	KapRNAI	L3N1	192	n	s	n	na	na		n/a
	2019-11-09	KapRNAI	L3N1	193	n	s	n	na	na		n
	2019-11-09	KapRNAI	L3N1	194	n	s	n	na	na		n/a
	2019-11-09	KapRNAI	L3N1	195	n	s	n	na	na		n/a
	2019-11-09	KapRNAI	L3N1	196	n	s	n	na	na		n
	2019-11-09	KapRNAI	L3N1	197	n	s	n	na	na		n
	2019-11-09	KapRNAI	L3N1	198	n	s	d	n	na		n/a
	2019-11-09	KapRNAI	L3N1	199	n	s	n	na	na		n
	2019-11-09	KapRNAI	L3N1	200	n	s	n	na	na		n
	2019-11-09	KapRNAI	L3N1	201	n	s	n	na	na		n/a
	2019-11-09	KapRNAI	L3N1	202	n	d	na	na	a		n/a
	2019-11-09	KapRNAI	L3N1	203	n	d	na	na	a		n
	2019-11-09	KapRNAI	L3N1	204	n	s	n	na	na		n/a
	2019-11-09	KapRNAI	L3N1	205	n	s	d	n	na		n/a
	2019-11-09	KapRNAI	L3N1	206	n	s	n	na	na		n
	2019-11-09	KapRNAI	L3N1	207	n	s	n	na	na		n/a
	2019-11-09	KapRNAI	L3N1	208	n	s	n	na	na		n
	2019-11-09	KapRNAI	L3N1	209	n	s	n	na	na		n/a
	2019-11-09	KapRNAI	L3N1	210	n	s	n	na	na		n/a
	2019-11-09	KapRNAI	L3N1	211	n	s	n	na	na		n/a
	2019-11-09	KapRNAI	L3N1	212	n	s	n	na	na		n/a
	2019-11-09	KapRNAI	L3N1	213	n	s	n	na	na		n
	2019-11-09	KapRNAI	L3N1	214	n	s	n	na	na		n
	2019-11-09	KapRNAI	L3N1	215	n	s	n	na	na		n
	2019-11-09	KapRNAI	L3N1	216	n	s	n	na	na		n/a
	2019-11-09	KapRNAI	L3N1	217	n	s	n	na	na		n
	2019-11-09	KapRNAI	L3N1	218	n	s	n	na	na		n/a
	2019-11-09	KapRNAI	L3N1	219	n	s	n	na	na		n/a
	2019-11-09	KapRNAI	L3N1	220	n	s	n	na	na		n
	2019-11-09	KapRNAI	L3N1	221	n	s	n	na	na		n/a
	2019-11-09	KapRNAI	L3N1	222	n	s	n	na	na		n/a
	2019-11-09	KapRNAI	L3N1	223	n	s	n	na	na		n/a
	2019-11-09	KapRNAI	L3N1	224	n	s	n	na	na		n
	2019-11-09	KapRNAI	L3N1	225	n	s	n	na	na		n/a
	2019-11-09	KapRNAI	L3N1	226	n	s	n	na	na		n/a
	2019-11-09	KapRNAI	L3N1	227	runs into end of movie						n
	2019-11-09	KapRNAI	L3N1	228	n	s	n	na	na		n/a
	2019-11-09	KapRNAI	L3N1	229	n	s	n	na	na		n
	2019-11-09	KapRNAI	L3N1	230	n	s	n	na	na		n/a
	2019-11-09	KapRNAI	L3N1	231	n	s	n	na	na		n
	2019-11-09	KapRNAI	L3N1	232	n	s	n	na	na		n/a
	2019-11-09	KapRNAI	L3N1	233	n	s	n	na	na		n/a
	2019-11-09	KapRNAI	L3N1	234	n	s	n	na	na		y
	2019-11-09	KapRNAI	L3N1	235	n	s	n	na	na		n/a
	2019-11-09	KapRNAI	L3N1	236	n	s	n	na	na		n/a
	2019-11-09	KapRNAI	L3N1	237	n	s	n	na	na		n/a
	2019-11-09	KapRNAI	L3N1	238	n	s	a	n	na		n/a
	2019-11-09	KapRNAI	L3N1	239	n	s	n	na	na		n/a
	2019-11-09	KapRNAI	L3N1	240	n	s	n	na	na		n/a
	2019-11-09	KapRNAI	L3N1	241	n	s	n	na	na		n/a
	2019-11-09	KapRNAI	L3N1	242	n	s	n	na	na		n
	2019-11-09	KapRNAI	L3N1	243	n	s	n	na	na		n/a
	2019-11-09	KapRNAI	L3N1	244	n	s	n	na	na		n/a
	2019-11-09	KapRNAI	L3N1	245	n	s	n	na	na		n/a
	2019-11-09	KapRNAI	L3N1	246	n	s	n	na	na		n/a
	2019-11-09	KapRNAI	L3N1	247	n	s	n	na	na		n/a
	2019-11-09	KapRNAI	L3N1	248	n	s	n	na	na		n/a
	2019-11-09	KapRNAI	L3N1	249	n	s	n	na	na		n/a
	2019-11-09	KapRNAI	L3N1	250	n	s	n	na	na		n/a
	2019-11-09	KapRNAI	L3N1	251	n	s	n	na	na		n/a
	2019-11-09	KapRNAI	L3N1	252	n	s	a	y	na		n
	2019-11-09	KapRNAI	L3N1	253	n	s	a	n	na		n/a
	2019-11-09	KapRNAI	L3N1	254	n	s	n	na	na		n/a
	2019-11-09	KapRNAI	L3N1	255	n	s	n	na	na		n/a
	2019-11-09	KapRNAI	L3N1	256	n	s	n	na	na		n/a
	2019-11-09	KapRNAI	L3N1	257	n	s	n	na	na		n
	2019-11-09	KapRNAI	L3N1	258	n	s	n	na	na		n/a
	2019-11-09	KapRNAI	L3N1	259	runs into end of movie						n/a
	2019-11-09	KapRNAI	L3N1	260	n	s	n	na	na		n/a
	2019-11-09	KapRNAI	L3N1	261	n	s	n	na	na		n/a
	2019-11-09	KapRNAI	L3N1	262	n	s	n	na	na		n/a
	2019-11-09	KapRNAI	L3N1	263	n	s	n	na	na		n/a
	2019-11-09	KapRNAI	L3N1	264	n	s	n	na	na		n/a
	2019-11-09	KapRNAI	L3N1	265	n	s	n	na	na		n/a
	2019-11-09	KapRNAI	L3N1	266	n	s	n	na	na		n
	2019-11-09	KapRNAI	L3N1	267	n	s	n	na	na		n/a
	2019-11-09	KapRNAI	L3N1	268	n	d	na	na	r		n/a
	2019-11-09	KapRNAI	L3N1	269	n	s	n	na	na		n/a
	2019-11-09	KapRNAI	L3N1	270	n	s	n	na	na		n/a
	2019-11-09	KapRNAI	L3N1	271	n	s	n	na	na		n/a
	2019-11-09	KapRNAI	L3N1	272	n	s	n	na	na		n/a
	2019-11-09	KapRNAI	L3N1	273	n	s	n	na	na		n/a
	2019-11-09	KapRNAI	L3N1	274	runs into end of movie						n/a
	2019-11-09	KapRNAI	L3N1	275	n	s	d	n	na		n/a
	2019-11-09	KapRNAI	L3N1	276	n	s	n	na	na		n/a
	2019-11-09	KapRNAI	L3N1	277	n	s	n	na	na		n/a
	2019-11-09	KapRNAI	L3N1	278	y	d	na	na	a
	2019-11-09	KapRNAI	L3N1	279	n	d	na	na	a		n/a
	2019-11-09	KapRNAI	L3N1	280	n	s	n	na	na		n/a
	2019-11-09	KapRNAI	L3N1	281	n	a	na	na	a		n/a
	2019-11-09	KapRNAI	L3N1	282	n	a	na	na	a		n/a
	2019-11-09	KapRNAI	L3N1	283	n	s	a	y	na		n/a
	2019-11-09	KapRNAI	L3N1	284	n	s	n	na	na		n
	2019-11-09	KapRNAI	L3N1	285	n	s	a	n	na		n/a
	2019-11-09	KapRNAI	L3N1	286	n	s	n	na	na		n/a
	2019-11-09	KapRNAI	L3N1	287	n	s	n	na	na		n/a
	2019-11-09	KapRNAI	L3N1	288	n	d	na	na	r		n/a
	2019-11-09	KapRNAI	L3N1	289	n	d	na	na	r		n/a
	2019-11-09	KapRNAI	L3N1	290	n	s	n	na	na		n/a
	2019-11-09	KapRNAI	L3N1	291	n	s	n	na	na		n/a
	2019-11-09	KapRNAI	L3N1	292	n	d	na	na	r		n/a
	2019-11-09	KapRNAI	L3N1	293	n	s	n	na	na		n/a
	2019-11-09	KapRNAI	L3N1	294	n	s	n	na	na		n/a
	2019-11-09	KapRNAI	L3N1	295	n	d	na	na	r		n/a
	2019-11-09	KapRNAI	L3N1	296	n	s	n	na	na		n/a
	2019-11-09	KapRNAI	L3N1	297	n	s	n	na	na		n/a
	2019-11-09	KapRNAI	L3N1	298	runs into end of movie						n/a
	2019-11-09	KapRNAI	L3N1	299	n	s	n	na	na		n/a
	2019-11-09	KapRNAI	L3N1	300	n	s	n	na	na		n/a
	2019-11-09	KapRNAI	L3N1	301	n	s	n	na	na		n/a
	2019-11-09	KapRNAI	L3N1	302	n	d	na	na	a		n/a
	2019-11-09	KapRNAI	L3N1	303	n	d	na	na	a		n/a
	2019-11-09	KapRNAI	L3N1	304	n	d	na	na	r		n/a
	2019-11-09	KapRNAI	L3N1	305	n	d	na	na	r		n/a
	2019-11-09	KapRNAI	L3N1	306	n	d	na	na	a		n/a
	2019-11-09	KapRNAI	L3N1	307	n	d	na	na	a		n/a
	2019-11-09	KapRNAI	L3N1	308	n	d	na	na	r		n/a
	2019-11-09	KapRNAI	L3N1	309	n	d	na	na	a		n/a
	2019-11-09	KapRNAI	L3N1	310	n	d	na	na	r		n/a
	2019-11-09	KapRNAI	L3N1	311	n	d	na	na	r		n/a
	2019-11-09	KapRNAI	L3N1	312	n	d	na	na	r		n/a
	2019-11-09	KapRNAI	L3N1	313	n	d	na	na	r		n/a
	2019-11-09	KapRNAI	L3N1	314	n	d	na	na	r		n/a
	2019-11-09	KapRNAI	L3N1	315	n	d	na	na	r		n/a
	2019-11-09	KapRNAI	L3N1	316	n	d	na	na	r		n/a
	2019-11-09	KapRNAI	L3N1	317	n	d	na	na	r		n/a

## Sheet: L3N1_8 11 19
	date	RNAi	movie name	comet number	in first frame	origin (soma, dendrite,axon)	approach axon/dendrite/no	enter axon/dendrite	polarity	angle of comet from axon	Turning events
	2019-11-08	KapRNAI	L3N1	1	y	s	n	na	na
	2019-11-08	KapRNAI	L3N1	2	y	s	n	na	na
	2019-11-08	KapRNAI	L3N1	3	y	a	na	na	a
	2019-11-08	KapRNAI	L3N1	4	n	a	na	na	a
	2019-11-08	KapRNAI	L3N1	5	y	a	na	na	a
	2019-11-08	KapRNAI	L3N1	6	y	s	n	na	na
	2019-11-08	KapRNAI	L3N1	7	n	s	n	na	na
	2019-11-08	KapRNAI	L3N1	8	y	s	n	na	na
	2019-11-08	KapRNAI	L3N1	9	n	s	a	y	na
	2019-11-08	KapRNAI	L3N1	10	n	s	a	y	na
	2019-11-08	KapRNAI	L3N1	11	n	s	a	y	na
	2019-11-08	KapRNAI	L3N1	12	n	a	na	na	a
	2019-11-08	KapRNAI	L3N1	13	n	a	na	na	a
	2019-11-08	KapRNAI	L3N1	14	n	s	a	y	na
	2019-11-08	KapRNAI	L3N1	15	n	a	na	na	a
	2019-11-08	KapRNAI	L3N1	16	n	a	na	na	a
	2019-11-08	KapRNAI	L3N1	17	n	a	na	na	a
	2019-11-08	KapRNAI	L3N1	18	n	s	a	y	na
	2019-11-08	KapRNAI	L3N1	19	n	s	n	na	na
	2019-11-08	KapRNAI	L3N1	20	n	s	n	na	na
	2019-11-08	KapRNAI	L3N1	21	n	s	a	y	na
	2019-11-08	KapRNAI	L3N1	22	n	s	d	n	na
	2019-11-08	KapRNAI	L3N1	23	y	d	na	na	r
	2019-11-08	KapRNAI	L3N1	24	y	d	na	na	r
	2019-11-08	KapRNAI	L3N1	25	y	d	na	na	r
	2019-11-08	KapRNAI	L3N1	26	n	d	na	na	a
	2019-11-08	KapRNAI	L3N1	27	n	s	d	n	na
	2019-11-08	KapRNAI	L3N1	28	n	d	na	na	a
	2019-11-08	KapRNAI	L3N1	29	y	d	na	na	r
	2019-11-08	KapRNAI	L3N1	30	n	s	n	na	na
	2019-11-08	KapRNAI	L3N1	31	y	d	na	na	a
	2019-11-08	KapRNAI	L3N1	32	n	s	n	na	na
	2019-11-08	KapRNAI	L3N1	33	n	s	d	y	na
	2019-11-08	KapRNAI	L3N1	34	n	d	na	na	a
	2019-11-08	KapRNAI	L3N1	35	n	s	n	na	na
	2019-11-08	KapRNAI	L3N1	36	y	s	n	na	na
	2019-11-08	KapRNAI	L3N1	37	n	s	d	n	na
	2019-11-08	KapRNAI	L3N1	38	n	s	n	na	na
	2019-11-08	KapRNAI	L3N1	39	n	s	n	na	na
	2019-11-08	KapRNAI	L3N1	40	n	s	a	n	na
	2019-11-08	KapRNAI	L3N1	41	n	s	n	na	na
	2019-11-08	KapRNAI	L3N1	42	n	s	n	na	na
	2019-11-08	KapRNAI	L3N1	43	n	s	n	na	na
	2019-11-08	KapRNAI	L3N1	44	n	s	n	na	na
	2019-11-08	KapRNAI	L3N1	45	n	s	n	na	na
	2019-11-08	KapRNAI	L3N1	46	n	s	n	na	na
	2019-11-08	KapRNAI	L3N1	47	n	s	n	na	na
	2019-11-08	KapRNAI	L3N1	48	n	d	na	na	a
	2019-11-08	KapRNAI	L3N1	49	n	s	n	na	na
	2019-11-08	KapRNAI	L3N1	50	n	s	n	na	na
	2019-11-08	KapRNAI	L3N1	51	n	d	na	na	r
	2019-11-08	KapRNAI	L3N1	52	n	s	n	na	na
	2019-11-08	KapRNAI	L3N1	53	n	d	na	na	a
	2019-11-08	KapRNAI	L3N1	54	n	s	d	n	na
	2019-11-08	KapRNAI	L3N1	55	n	d	na	na	a
	2019-11-08	KapRNAI	L3N1	56	n	d	na	na	r
	2019-11-08	KapRNAI	L3N1	57	n	s	n	na	na
	2019-11-08	KapRNAI	L3N1	58	n	s	n	na	na
	2019-11-08	KapRNAI	L3N1	59	n	s	n	na	na
	2019-11-08	KapRNAI	L3N1	60	n	s	n	na	na
	2019-11-08	KapRNAI	L3N1	61	n	d	na	na	r
	2019-11-08	KapRNAI	L3N1	62	n	d	na	na	a
	2019-11-08	KapRNAI	L3N1	63	n	d	na	na	a
	2019-11-08	KapRNAI	L3N1	64	n	s	n	na	na
	2019-11-08	KapRNAI	L3N1	65	n	d	na	na	r
	2019-11-08	KapRNAI	L3N1	66	n	s	d	n	na
	2019-11-08	KapRNAI	L3N1	67	n	s	d	y	na
	2019-11-08	KapRNAI	L3N1	68	n	d	na	na	a
	2019-11-08	KapRNAI	L3N1	69	n	d	na	na	r
	2019-11-08	KapRNAI	L3N1	70	n	s	n	na	na
	2019-11-08	KapRNAI	L3N1	71	n	s	n	na	na
	2019-11-08	KapRNAI	L3N1	72	n	s	n	na	na
	2019-11-08	KapRNAI	L3N1	73	n	s	n	na	na
	2019-11-08	KapRNAI	L3N1	74	n	s	n	na	na
	2019-11-08	KapRNAI	L3N1	75	n	s	n	na	na
	2019-11-08	KapRNAI	L3N1	76	n	s	d	n	na
	2019-11-08	KapRNAI	L3N1	77	n	s	n	na	na
	2019-11-08	KapRNAI	L3N1	78	n	d	na	na	r
	2019-11-08	KapRNAI	L3N1	79	n	d	na	na	r
	2019-11-08	KapRNAI	L3N1	80	n	s	n	na	na
	2019-11-08	KapRNAI	L3N1	81	n	s	n	na	na
	2019-11-08	KapRNAI	L3N1	82	n	s	n	na	na
	2019-11-08	KapRNAI	L3N1	83	n	s	d	n	na
	2019-11-08	KapRNAI	L3N1	84	n	s	d	n	na
	2019-11-08	KapRNAI	L3N1	85	n	s	a	n	na
	2019-11-08	KapRNAI	L3N1	86	n	s	a	y	na
	2019-11-08	KapRNAI	L3N1	87	n	s	d	n	na
	2019-11-08	KapRNAI	L3N1	88	n	a	na	na	a
	2019-11-08	KapRNAI	L3N1	89	n	s	n	na	na
	2019-11-08	KapRNAI	L3N1	90	n	s	n	na	na
	2019-11-08	KapRNAI	L3N1	91	n	s	n	na	na
	2019-11-08	KapRNAI	L3N1	92	n	s	n	na	na
	2019-11-08	KapRNAI	L3N1	93	n	s	n	na	na
	2019-11-08	KapRNAI	L3N1	94	n	s	n	na	na
	2019-11-08	KapRNAI	L3N1	95	n	s	n	na	na
	2019-11-08	KapRNAI	L3N1	96	n	s	n	na	na
	2019-11-08	KapRNAI	L3N1	97	n	s	n	na	na
	2019-11-08	KapRNAI	L3N1	98	n	s	n	na	na
	2019-11-08	KapRNAI	L3N1	99	n	s	n	na	na
	2019-11-08	KapRNAI	L3N1	100	n	s	n	na	na
	2019-11-08	KapRNAI	L3N1	101	n	s	n	na	na
	2019-11-08	KapRNAI	L3N1	102	n	a	na	na	a
	2019-11-08	KapRNAI	L3N1	103	n	s	n	na	na
	2019-11-08	KapRNAI	L3N1	104	n	a	na	na	a
	2019-11-08	KapRNAI	L3N1	105	n	s	n	na	na
	2019-11-08	KapRNAI	L3N1	106	n	s	n	na	na
	2019-11-08	KapRNAI	L3N1	107	n	d	na	na	r
	2019-11-08	KapRNAI	L3N1	108	n	d	na	na	r
	2019-11-08	KapRNAI	L3N1	109	n	s	n	na	na
	2019-11-08	KapRNAI	L3N1	110	n	s	n	na	na
	2019-11-08	KapRNAI	L3N1	111	n	s	n	na	na
	2019-11-08	KapRNAI	L3N1	112	n	s	a	y	na
	2019-11-08	KapRNAI	L3N1	113	n	s	a	n	na
	2019-11-08	KapRNAI	L3N1	114	n	s	n	na	na
	2019-11-08	KapRNAI	L3N1	115	n	s	n	na	na
	2019-11-08	KapRNAI	L3N1	116	n	s	n	na	na
	2019-11-08	KapRNAI	L3N1	117	n	d	na	na	r
	2019-11-08	KapRNAI	L3N1	118	n	s	n	na	na
	2019-11-08	KapRNAI	L3N1	119	n	s	n	na	na
	2019-11-08	KapRNAI	L3N1	120	n	s	n	na	na
	2019-11-08	KapRNAI	L3N1	121	n	s	a	n	na
	2019-11-08	KapRNAI	L3N1	122	n	s	n	na	na
	2019-11-08	KapRNAI	L3N1	123	n	s	n	na	na
	2019-11-08	KapRNAI	L3N1	124	n	s	n	na	na
	2019-11-08	KapRNAI	L3N1	125	n	s	n	na	na
	2019-11-08	KapRNAI	L3N1	126	n	s	n	na	na
	2019-11-08	KapRNAI	L3N1	127	n	s	n	na	na
	2019-11-08	KapRNAI	L3N1	128	n	s	n	na	na
	2019-11-08	KapRNAI	L3N1	129	n	s	n	na	na
	2019-11-08	KapRNAI	L3N1	130	n	d	na	na	r
	2019-11-08	KapRNAI	L3N1	131	n	s	n	na	na
	2019-11-08	KapRNAI	L3N1	132	n	s	n	na	na

[truncated: 1 more sheets: summary]
