# Supplementary material for: Microtubules originate asymmetrically at the somatic golgi and are guided via Kinesin2 to maintain polarity within neurons
Source: eLife. 2020 Jul 13;9:e58943. doi: 10.7554/eLife.58943 (PMC7394546; doi:10.7554/eLife.58943)
Supplement: Figure 7—source data 3. [file elife-58943-fig7-data3.xlsx]

## Sheet: Klp64D_RNAi
	We have 10 movies for Klp64D RNAi
	Perform a quick quantification by just looking at % of comets that enter dendrites
	comets approach	comets enter
L1N1_3_3_20	3	2
L2N1_3_3_20	13	7
L3N1_3_3_20	3	3
L4N1_3_3_20	15	10
L5N1_3_3_20	6	5
L6N1_3_3_20	7	6
L7N1_3_3_20	4	2
L1N1_5_3_20	7	6
L2N1_5_3_20	9	5
L3N1_5_3_20	13	10
	80	56
		70
